# Supplementary material for: LOw-dose CT Or Lung UltraSonography versus standard of care based-strategies for the diagnosis of pneumonia in the elderly: protocol for a multicentre randomised controlled trial (OCTOPLUS)
Source: PubMed Central journal article supplement — BMJ Open. 2022 May 6;12(5):e055869. doi: 10.1136/bmjopen-2021-055869 (PMC9083386; doi:10.1136/bmjopen-2021-055869), 2022-05-06
Supplement: bmjopen-2021-055869.draft_revisions.pdf [file bmjopen-2021-055869.draft_revisions.pdf]

# BMJ Open

BMJ Open is committed to open peer review. As part of this commitment we make the peer review history of every article we publish publicly available.

When an article is published we post the peer reviewers' comments and the authors' responses online. We also post the versions of the paper that were used during peer review. These are the versions that the peer review comments apply to.

The versions of the paper that follow are the versions that were submitted during the peer review process. They are not the versions of record or the final published versions. They should not be cited or distributed as the published version of this manuscript.

BMJ Open is an open access journal and the full, final, typeset and author-corrected version of record of the manuscript is available on our site with no access controls, subscription charges or pay-per-view fees (<http://bmjopen.bmj.com>).

If you have any questions on BMJ Open's open peer review process please email [info.bmjopen@bmj.com](mailto:info.bmjopen@bmj.com)

# BMJ Open

## LOW-dose CT cOmPared to Lung UltraSonography vs standard of care based-strategies for the diagnosis of pneumonia in the elderly: a multicentre randomised controlled trial (OCTOPLUS)

|                               |                                                                                                                                                                                                                                                                                                                                                                                                                                                                                                                                                                                                                                                                                                                                                                                                                                                                                                                                            |
|-------------------------------|--------------------------------------------------------------------------------------------------------------------------------------------------------------------------------------------------------------------------------------------------------------------------------------------------------------------------------------------------------------------------------------------------------------------------------------------------------------------------------------------------------------------------------------------------------------------------------------------------------------------------------------------------------------------------------------------------------------------------------------------------------------------------------------------------------------------------------------------------------------------------------------------------------------------------------------------|
| Journal:                      | <i>BMJ Open</i>                                                                                                                                                                                                                                                                                                                                                                                                                                                                                                                                                                                                                                                                                                                                                                                                                                                                                                                            |
| Manuscript ID                 | bmjopen-2021-055869                                                                                                                                                                                                                                                                                                                                                                                                                                                                                                                                                                                                                                                                                                                                                                                                                                                                                                                        |
| Article Type:                 | Protocol                                                                                                                                                                                                                                                                                                                                                                                                                                                                                                                                                                                                                                                                                                                                                                                                                                                                                                                                   |
| Date Submitted by the Author: | 16-Aug-2021                                                                                                                                                                                                                                                                                                                                                                                                                                                                                                                                                                                                                                                                                                                                                                                                                                                                                                                                |
| Complete List of Authors:     | Prendki, Virginie; Geneva University Hospitals, Division of Internal Medicine for the Aged; Geneva University Hospitals, Division of Infectious Diseases<br>Garin, Nicolas; Riviera Chablais Hospitals, Division of General Internal Medicine; Geneva University Hospitals, Department of Internal Medicine Specialties<br>Stirnemann, Jerome; Geneva University Hospitals, Department of Internal Medicine Specialties<br>Christophe, Combescure; University Hospitals of Geneva Department of Internal Medicine, Department of Health and Community Medicine<br>Platon, Alexandra; Geneva University Hospitals, Diagnostic Department, Division of Radiology<br>Bernasconi, Enos; Lugano Regional Hospital Civico Site, Division of Infectious Diseases<br>Sauter, Thomas; Inselspital University Hospital Bern, Department of Emergency Medicine<br>Hautz, Wolf; Inselspital University Hospital Bern, Department of Emergency Medicine |
| Keywords:                     | Thoracic medicine < INTERNAL MEDICINE, Respiratory infections < THORACIC MEDICINE, GERIATRIC MEDICINE                                                                                                                                                                                                                                                                                                                                                                                                                                                                                                                                                                                                                                                                                                                                                                                                                                      |
|                               |                                                                                                                                                                                                                                                                                                                                                                                                                                                                                                                                                                                                                                                                                                                                                                                                                                                                                                                                            |

SCHOLARONE™  
Manuscripts

1  
2  
3 **LOw-dose CT cOmPared to Lung UltraSonography vs standard of care based-strategies for the**  
4 **diagnosis of pneumonia in the elderly: a multicentre randomised controlled trial (OCTOPLUS)**  
5

6 Virginie Prendki<sup>1,2</sup>, Nicolas Garin<sup>3,4</sup>, Jerome Stirnemann<sup>4</sup>, Christophe Combescure<sup>5</sup>, Alexandra Platon<sup>6</sup>,  
7 Enos Bernasconi<sup>7</sup>, Thomas C. Sauter<sup>8</sup>, Wolf E. Hautz<sup>8</sup> and the OCTOPLUS study group  
8  
9

10 1 Division of Internal Medicine for the Aged, Geneva University Hospitals, Thônex, Switzerland  
11

12 2 Division of Infectious Diseases, Geneva University Hospitals, Geneva, Switzerland  
13

14 3 Division of General Internal Medicine, Riviera Chablais Hospitals, Rennaz, Switzerland  
15

16 4 Department of Internal Medicine Specialties, Geneva University Hospitals, Geneva, Switzerland  
17

18 5 Department of Health and Community Medicine, University Hospitals of Geneva, Geneva, Switzerland  
19

20 6 Diagnostic Department, Division of Radiology, Geneva University Hospitals, Geneva, Switzerland  
21

22 7 Division of Infectious Diseases, Regional Hospital Lugano, University of Southern Switzerland,  
23 Lugano, Switzerland  
24

25 8 Department of Emergency Medicine, Inselspital University Hospital Bern, Bern, Switzerland  
26  
27  
28  
29  
30  
31

32 **Correspondence**  
33

34 Virginie Prendki, MD  
35

36 Division of Internal Medicine for the Aged, and Division of Infectious Diseases, Geneva University  
37 Hospitals and University of Geneva  
38

39 Hôpital des Trois-Chêne, Chemin du Pont-Bochet 3, 1226 Thônex-Genève, Switzerland  
40

41 Tel: +41795538308  
42

43 Email: virginie.prendki@hcuge.ch  
44  
45  
46  
47  
48  
49  
50  
51  
52  
53  
54  
55  
56  
57  
58  
59  
60

## Structured abstract

**Introduction:** Pneumonia is a leading cause of mortality and a common indication for antibiotic in elderly patients. However, its diagnosis is often inaccurate. We aim to compare the diagnostic accuracy, the clinical and cost outcomes and the use of antibiotics associated with three imaging strategies in patients >65 years old with suspected pneumonia in the emergency room (ER): Chest-X ray (CXR, standard of care), low-dose CT scan (LDCT) or lung US (LUS).

**Methods and analysis:** This is a multicenter randomized superiority clinical trial with three parallel arms. Patients will be allocated in the ER to a diagnostic strategy based on either CXR, LDCT, or LUS. All three imaging modalities will be performed but the results of two of them will be masked during 5 days to the patients, the physicians in charge of the patients and the investigators according to random allocation. The primary objective is to compare the accuracy of LDCT vs.CXR- based strategies. As secondary objectives, antibiotics prescriptions, clinical and cost outcomes will be compared, and the same analyses repeated to compare the LUS and CXR strategies. The reference diagnosis will be established *a posteriori* by a panel of experts. Based on a previous study, we expect an improvement of 16% of the accuracy of pneumonia diagnosis using LDCT instead of CXR. Under this assumption, and accounting for 10% of drop out, the enrolment of 495 patients is needed to prove the superiority of LDCT over CRX (alpha error =0.05, beta error=0.10).

**Impact of the study:** Superiority of the LDCT or LUS strategy over CXR would affect recommendations for the diagnosis of pneumonia in elderly patients. A higher accuracy of one of the strategies may decrease antibiotics overuse and lead to better outcomes and reduced costs.

**Ethics and dissemination:** Ethical approval: CER Geneva 2019-01288. Trial registration number: NCT04978116.

## Strengths and limitations of this study

- To our knowledge, no randomized trial ever compared head to head the accuracy of CXR-, LDCT- and LUS-based strategies in the diagnosis of pneumonia.
- This study will add knowledge on the accuracy of pneumonia diagnosis in elderly patients, an understudied population.
- To minimize information bias, CXR, LDCT and LUS images and interpretations will be available for each patient and taken into consideration by the panel of experts adjudicating the reference diagnosis.
- LUS realization will be standardized in participating centres in order to minimize heterogeneity.

## INTRODUCTION

By 2050, one in four people in Europa and Northern America will be aged 65 years or over according to demographic projections.<sup>1</sup> Pneumonia principally affects older people, with two thirds of patients hospitalized for pneumonia aged more than 70 years.<sup>2</sup> Accordingly, the burden of pneumonia on health and economic outcomes is expected to increase. Pneumonia is also the most frequent cause of antimicrobial therapy prescription in this population.<sup>3 4</sup> However, studies specifically investigating the elderly are scarce.

### Diagnosis of pneumonia

According to international guidelines, the diagnosis of pneumonia is based on suggestive clinical signs and symptoms and the presence of a new infiltrate on chest X-ray (CXR).<sup>5 6</sup> However, signs and symptoms of pneumonia have poor sensitivity and specificity in older patients who often present with unspecific complaints. There is a significant overlap in the clinical presentation between pneumonia and other respiratory or infectious conditions frequently present in the elderly like acute heart failure, chronic obstructive pulmonary disease exacerbation, and non-respiratory sepsis. As for the radiologic demonstration of an acute lung infiltrate, the elderly have a higher prevalence of pre-existing cardiac, pulmonary, and thoracic wall diseases complicating the interpretation of radiologic studies. Moreover, several diseases can simultaneously affect the same individual.<sup>7 8</sup> Obtaining good quality radiographs can be challenging in this population and CXR also lacks sensitivity to detect pneumonia, which exposes patients to the risk of late initiation of appropriate antibiotic treatment.<sup>9</sup> All these issues may lead to a high prevalence of diagnostic errors, delays in the correct management of patients' conditions, overprescription of antimicrobial drugs and finally poor patients' outcome.<sup>10-18</sup> This translates in a positive predictive value of only 60% to 75% for an initial diagnosis of community-acquired pneumonia in hospitalized patients when compared with the final diagnosis.<sup>19 20</sup> Misdiagnosis of pneumonia may translate in harmful delays in the correct management of the real cause of patients' symptoms, an understudied issue. Alternative imaging strategies have been proposed to surpass the acknowledged drawbacks of the current diagnostic work-up of pneumonia.

### Thoracic computed tomography scan

The use of computed tomography (CT) scan is sometimes recommended when standard imaging is inconclusive.<sup>9 21</sup> In a cohort of 319 adult patients with suspected pneumonia, Claessens et al reported that early CT scan changed the diagnostic classification of pneumonia in 59%.<sup>22</sup> Modification of pneumonia probability (mostly, but not only, downgrading of the probability of pneumonia) was concordant with the final classification of an adjudication committee in 80%. The absolute Net Reclassification Improvement was 60/319 (18%). The authors also demonstrated the feasibility of rapidly obtaining a CT scan in the emergency room (ER) settings for patients suspected of pneumonia.

Similar results were obtained with elderly patients in the PneumO-LD-CT cohort.<sup>23</sup> Among 200 patients (median age 84 years, IQR: 79-90) with suspected pneumonia, performing a low-dose CT-scan immediately after admission led to Net Reclassification Improvement in 16/200 patients (8%) (reference diagnosis adjudicated *a posteriori* by a panel of experts). Correct reclassification was mainly observed

1  
2  
3 in patients not having pneumonia, suggesting that low-dose CT (LDCT) would mainly reduce the  
4 overdiagnosis of pneumonia in this population.<sup>24</sup>  
5

6 The advantages of a CT scan-based strategy could be greater in elderly patients as it can be challenging  
7 to obtain good quality CXR and, as mentioned above, pneumonia can be difficult to distinguish from  
8 other frequent conditions. Native LDCT is appropriate to study the lung fields, is free of risks associated  
9 with contrast medium injection, and the irradiation burden is low.  
10  
11

### 12 13 **Lung ultrasonography**

14  
15 Lung ultrasonography (LUS) is another imaging modality under investigation for the diagnosis of  
16 pneumonia. LUS has significant advantages, being increasingly available, non-irradiating, easy to  
17 perform directly at the bedside, and is increasingly done by trained emergency physicians. LUS  
18 realization can be taught quickly.<sup>25</sup> Its main drawback is the operator-dependent accuracy. Diagnostic  
19 studies evaluating LUS have reported a sensitivity of 80% to 90% and a specificity of 70% to 90% in  
20 pneumonia, using various reference standards.<sup>26-29</sup> In studies using CT scan as the reference standard,  
21 LUS showed a higher sensitivity than CXR, with similar specificity.<sup>29 30</sup> However, LUS has never been  
22 compared with CXR and LDCT for the diagnosis of pneumonia in a randomized controlled study, and  
23 data on its performance in elderly patients are scarce.<sup>31 32</sup>  
24  
25  
26  
27  
28

### 29 **Rationale for the study**

30  
31 On these premises, a LDCT or LUS-based work-up for suspected pneumonia may have significant  
32 advantages over a standard CXR-based strategy. Superior diagnostic accuracy of either modality may  
33 lead to better short-term outcomes through early appropriate management of the disease causing the  
34 symptoms; to more appropriate antibiotic prescription; and to less additional diagnostic tests ordered.  
35 However, the impacts of reduced false positive and false negative diagnoses on costs, prognosis and  
36 quality of life should be assessed, along with costs associated with the three imaging modalities. Only  
37 a randomized trial comparing each diagnostic strategy head to head can allow for a reliable comparison  
38 of strategies' performance.  
39  
40  
41  
42

43 Based on the results of our previous study, we hypothesize that a LDCT-based diagnostic strategy will  
44 have better accuracy than the standard of care CXR-based strategy for the diagnosis of pneumonia in  
45 elderly patients admitted to the ER. This could translate in better clinical and cost outcomes and less  
46 inappropriate use of antibiotics. The same could be true if a LUS-based strategy is more accurate than  
47 the CXR-based strategy.  
48  
49

## 50 **METHODS AND ANALYSIS**

### 51 **Setting**

52  
53 This study will be conducted in three academic hospitals and one tertiary care hospital in Switzerland:  
54 Geneva University Hospitals, Geneva; Inselspital, Bern; Regional Hospital Lugano, Lugano and Riviera  
55 Chablais Hospital, Rennaz.  
56  
57  
58  
59

### 60 **Study design**

1  
2  
3 We used the Standard Protocol Items: Recommendations for Interventional Trials (SPIRIT) checklist  
4 when writing our protocol.<sup>33</sup>  
5

6 This is a multicenter randomized superiority clinical trial with three parallel arms aiming to compare the  
7 accuracy of imaging-based strategies for diagnosis of pneumonia in elderly patients admitted to the ER  
8 (figure 1).  
9

10  
11 Each patient will be randomly allocated in the ER to one of the three imaging examination (CXR, LDCT  
12 or LUS), which will be immediately performed, interpreted by one of two independent radiologists (one  
13 for CXR and one for LDCT) or by an independent emergency physician trained in ultrasonography (LUS)  
14 and reported in a standardized form. The physician in charge of the patient will have access to the  
15 imaging examination and the corresponding report, in addition to usual clinical and biological data  
16 obtained in the diagnostic work-up of suspected pneumonia; he will be asked to assess the probability  
17 of pneumonia before the patient is discharged from the ER.  
18  
19

20  
21  
22 For each patient, the two other imaging examinations will also be performed and interpreted as  
23 described above, but the physician in charge of the patient will be blinded to these results. The results  
24 of all three imaging examinations and the interpretation will however be available to the panel of experts,  
25 whose final diagnosis of pneumonia will be the reference diagnosis for the study.  
26  
27

28 All enrolled patients will be followed up by study staff during hospitalization and by phone at month 1  
29 and 3.  
30

### 31 **Sample size**

32  
33 The sample size calculation was based on the accuracy of diagnostic strategies for pneumonia  
34 assessed in the PneumO-LD-CT cohort (unpublished results, table 1 bis in appendix). In this study, the  
35 accuracy of the clinician's diagnosis was 68% when based on CXR and 84% when based on LDCT.  
36  
37

38  
39 With an expected improvement of 16% of the accuracy using LDCT instead of CXR, 150 patients will  
40 be required in each arm to demonstrate the superiority of LDCT over CXR with a two-sided alpha error  
41 of 0.05 and a power of 90%. Allowing for a 10% dropout after randomization, the final recruitment  
42 objective is 165 patients in each arm, for a total of 495 patients.  
43  
44  
45  
46  
47  
48  
49  
50  
51  
52  
53  
54  
55  
56  
57  
58  
59  
60

## Patient population

Patients aged >65 years consulting in the ER with suspected community acquired pneumonia (CAP) or nursing-home acquired pneumonia.

## Eligibility criteria

Eligible patients will be patients aged >65 years consulting in the ER with suspected pneumonia. At least one respiratory symptom and one sign or laboratory finding compatible with infection are required (details in table 1). In the oldest old (patients aged 80 years or older), the presence of acute delirium or unexplained acute fall can substitute for the presence of either the respiratory or the infectious symptoms.

Inclusion and exclusion criteria are listed in details in table 1.

**Table 1. Eligibility criteria**

| <b>Inclusion criteria</b>                                                                                                                                                                                                                                                                                                                                                                                                                                                                                      |
|----------------------------------------------------------------------------------------------------------------------------------------------------------------------------------------------------------------------------------------------------------------------------------------------------------------------------------------------------------------------------------------------------------------------------------------------------------------------------------------------------------------|
| Age >65 years                                                                                                                                                                                                                                                                                                                                                                                                                                                                                                  |
| Suspected community acquired pneumonia (CAP) or nursing-home acquired pneumonia with :<br>-At least one respiratory symptom (new or increasing cough or dyspnoea, purulent sputum, pleuritic chest pain, respiratory rate >20/min, focal auscultatory findings or oxygen saturation <90% on room air)<br>-AND at least one sign or laboratory finding compatible with an infection (temperature >37.8°C or <36.0°C, CRP >10 mg/L, PCT >0.25 µg/L, leukocyte count >10G/L with >85% neutrophils or band forms). |
| Signed informed consent                                                                                                                                                                                                                                                                                                                                                                                                                                                                                        |
| In the oldest old (patients aged 80 years or older), the presence of acute delirium or unexplained acute fall can substitute for the presence of either the respiratory or the infectious symptom                                                                                                                                                                                                                                                                                                              |
| <b>Exclusion criteria</b>                                                                                                                                                                                                                                                                                                                                                                                                                                                                                      |
| Immediate admission to the intensive care unit (ICU)                                                                                                                                                                                                                                                                                                                                                                                                                                                           |
| Pneumonia in the past 3 months                                                                                                                                                                                                                                                                                                                                                                                                                                                                                 |
| positive PCR for SARS-CoV-2 or antigenic test within 3 past weeks and before the arrival in the ER                                                                                                                                                                                                                                                                                                                                                                                                             |
| Transfer from another hospital with a diagnosis of pneumonia                                                                                                                                                                                                                                                                                                                                                                                                                                                   |
| Thoracic CXR or CT scan or US during the present episode                                                                                                                                                                                                                                                                                                                                                                                                                                                       |
| Immediate contrast-enhanced thoracic CT scan needed                                                                                                                                                                                                                                                                                                                                                                                                                                                            |
| Advanced care planning limiting therapy to comfort care only                                                                                                                                                                                                                                                                                                                                                                                                                                                   |
| Prisoners                                                                                                                                                                                                                                                                                                                                                                                                                                                                                                      |
| Patients with known uncontrolled psychiatric disorders                                                                                                                                                                                                                                                                                                                                                                                                                                                         |
| Previous enrollment into the current study                                                                                                                                                                                                                                                                                                                                                                                                                                                                     |



## Recruitment

At the ER of each recruiting site, dedicated research staff will screen admissions and ask suitable patients for participation in the study. In addition, triage nurses and physicians working at the ER will be asked to call research staff when identifying any potential participant.

Due to the high complexity of the inclusion process and of the simultaneous realisation of three imaging modalities, the patients will only be included during working hours. We expect a recruitment duration of 2 years. If the enrolment goals are not met, the study duration may be extended.

## Randomisation

Patients will be randomised using Research Electronic Data Capture (REDCap®) tool, a secured web-based application designed to support data capture and randomisation for research studies. Randomization will be done immediately after inclusion, stratified by centre and using permuted block sizes.

## Interventions

Standard of care: CXR will be done preferentially standing and with 2 incidences, which is the recommended and most commonly used diagnostic imaging modality for pneumonia in guidelines.<sup>5 6</sup>

LDCT scan will be obtained without administration of intra-venous contrast. LDCT performance lasts 10 minutes. Mean radiation exposure is 1.5 +/- 0.47 mSv, to be compared with a mean exposure of 0.05 +/- 0.03 mSv for conventional CXR, 7 mSv for a full-dose CT scan, and to Switzerland's natural background radiation level of 4mSv/year.<sup>34</sup> LDCT and CXR will be interpreted by two independent radiologists who will not be allowed to communicate.<sup>22</sup>

LUS will be performed at bedside by a trained physician not involved in management of the patient, using the device available in the corresponding ER (models and commercial brand may differ between different ER). All physicians performing the LUS (thereafter: ultrasonographers) will be board-certified in the realization of Point-Of-Care Ultrasonography. To enhance homogeneity of ultrasonographers reporting, they will be trained to use the standardized report form before the beginning of the inclusions.

## Blinding/unblinding procedure

The two masked radiological examinations will be concealed to the physicians caring for the patients during 5 days. Emergency unblinding will be allowed in case of identification of an immediately life-threatening finding (table 2). In this occurrence, the radiologist or ultrasonographer will make an emergent call to the investigator before communicating the results to the clinician.

The clinician in charge of the patient will be allowed to prescribe any new imaging deemed necessary in case of later clinical deterioration (eg. full dose chest CT scan with intravenous contrast for suspected pulmonary embolism).

At day 5, the research staff will ensure that the two blinded radiological examinations along with the standardized reports are made accessible again on the patient's medical record.

**Table 2. Causes of emergency unblinding**

|                                                         |
|---------------------------------------------------------|
| Pneumothorax                                            |
| Haemothorax                                             |
| Indirect signs of aortic dissection                     |
| Indirect signs of aneurysmal rupture (haemomediastinum) |
| Massive pericardial effusion                            |
| Tracheal foreign body                                   |
| Pneumoperitoneum                                        |
| Pneumomediastinum                                       |
| Malignant airway obstruction                            |
| Suspected acute tuberculosis                            |

**Reference diagnosis**

A panel of experts composed of senior clinicians, including internists, geriatricians, infectious diseases specialists and radiologists, blinded to the allocation arm and the probability of pneumonia estimated by the clinician in charge, will rate *a posteriori* the probability of pneumonia. They will have access to all available but de-identified patient data present in the medical records at 1 month, including the images of CXR, LDCT, and LUS and corresponding reports. They will be trained before the adjudication process and asked to follow international guidelines for the diagnosis of pneumonia. A Delphi method will be used to obtain a consensus about the diagnosis of pneumonia.

**Data safety monitoring board**

A safety analysis will be performed after 200 patients have completed the 1-month follow-up. Safety outcomes will be: unplanned transfer to the ICU and 1-month mortality. Based on this analysis, the data safety monitoring board can recommend to discontinue one arm or all arms of the trial. No interim analysis for futility or superiority is planned.

**OBJECTIVES****Comparison between CXR- and LDCT-based diagnostic strategies for:**

- Diagnostic performance, including accuracy (**primary outcome**), sensitivity, specificity, positive and negative predictive value and likelihood ratio
- Treatment and management (antibiotic prescriptions and additional imaging)
- Clinical outcomes (including length of stay, mortality, quality of life)
- Cost per patient

Other secondary objectives:

- The same objectives for the comparison between CXR- and LUS-based diagnostic strategies

- 1  
2  
3 - Association between biomarkers and imaging-based diagnosis  
4  
5 - Association between characteristics of clinicians and accuracy of imaging-based strategies  
6  
7  
8

9 **OUTCOMES**

10  
11 Primary outcome: diagnostic accuracy of imaging-based strategies at the end of the ER evaluation,  
12 using the expert panel as the reference standard.

13  
14  
15 Secondary outcomes are developed in table 3.  
16  
17

18  
19 **Table 3. Secondary outcomes**

20  
21  
22

| <b>Diagnostic outcomes parameters and measurement</b>                                                                   |                                                                                                                     |
|-------------------------------------------------------------------------------------------------------------------------|---------------------------------------------------------------------------------------------------------------------|
| Sensitivity and specificity of imaging-based strategies                                                                 | Using panel of experts as reference                                                                                 |
| Unmasked imaging modalities in emergency                                                                                | Number of unmasked imaging results (reasons shown in table 2)                                                       |
| Alternative diagnoses                                                                                                   | Standardized report at the ER                                                                                       |
| Additional imaging studies ordered                                                                                      | Number of additional CXR, thoracic CT scan and US prescribed by the clinician during the acute setting              |
| Biological markers                                                                                                      | C-reactive protein, Procalcitonin at admission                                                                      |
| <b>Treatment outcomes parameters and measurement</b>                                                                    |                                                                                                                     |
| Antibiotic free days at day 30                                                                                          | By phone or patient record                                                                                          |
| <b>Clinical outcomes parameters and measurement</b>                                                                     |                                                                                                                     |
| Quality of life                                                                                                         | EQ-5D-3L questionnaire and CAP score questionnaire <sup>35</sup> (pneumonia-specific quality of life questionnaire) |
| Length of hospital stay                                                                                                 | Patient record                                                                                                      |
| Transfer to rehabilitation or long term care facility                                                                   | Patient record                                                                                                      |
| Transfer to the intensive care unit                                                                                     | Patient record                                                                                                      |
| All cause mortality and readmission                                                                                     | Patient record, follow-up                                                                                           |
| <b>Cost outcomes parameters and measurement</b>                                                                         |                                                                                                                     |
| Cost (of care, physician, imaging, laboratory, treatment and others per patient), unit of work consumption per hospital | Hospital financial database                                                                                         |

23  
24  
25  
26  
27  
28  
29  
30  
31  
32  
33  
34  
35  
36  
37  
38  
39  
40  
41  
42  
43  
44  
45  
46  
47  
48  
49  
50  
51  
52  
53  
54  
55  
56  
57  
58  
59  
60

## Outcome assessment

### Primary outcome

The primary outcome is the accuracy of the clinician's diagnosis using the experts' diagnosis as reference. The probability of pneumonia will be rated by the clinician, before the patient is discharged from the ER, on a 3-level Likert scale ("low", "intermediate" or "high"). The probability of pneumonia will be rated by the panel of experts *a posteriori* on the same scale. For the primary outcome, a diagnosis of pneumonia will be positive if the probability is rated "intermediate" or "high" and negative if the probability is rated "low". The accuracy will be the proportion of patients with a clinician's diagnosis (either negative or positive) matching with the panel of experts' diagnosis which is considered as the reference. Grouping the levels "intermediate" or "high" makes sense from a medical decision making perspective since a patient rated "intermediate" will be treated with antibiotics in the same way as a patient rated "high". In a secondary analysis, the diagnosis of pneumonia will be considered positive only if the probability is rated "high".

## STATISTICAL METHODS

We hypothesize that the diagnostic accuracy will be higher with the LDCT-based strategy than with CXR-based strategy. The null hypothesis that will be tested in the primary analysis is the equality of accuracy with these two strategies.

### Population analysis

The analysis will follow the intention to treat principle. A sensitivity analysis will be conducted on the per protocol population (i.e. excluding patients for whom an imaging or its standardized report which should have been masked has been available to the clinician who assesses the probability of pneumonia at the ER).

### Primary analysis

The proportions of correctly classified patients in the LDCT and CXR arms will be calculated with 95% Clopper-Pearson confidence intervals (CIs), and will be compared with a logistic regression model adjusted for sites to account for the stratified randomization. The statistical test will be two-sided and the significance threshold will be 0.05.

### Secondary analyses

#### 1) Analyses related to diagnostic outcomes:

- a. The primary analysis will be repeated to compare CXR- and LUS-based strategies
- b. Sensitivity, specificity, predictive values and likelihood ratios will be assessed by arm. Sensitivity (respectively specificity) will be compared between strategies (logistic regression model).
- c. The proportions of imaging results needing unmasking and of additional radiological studies (and invasive procedures) during the hospitalisation will be compared between strategies (logistic regression model).

- d. The proportion of patients with an alternative diagnosis consistent between clinicians and experts will be compared between strategies (logistic regression model).
- e. Interagreement rate for the probability of pneumonia rated on a 3-level Likert scale: the agreement between raters participating to the trial and a consensus of experts in thoracic imaging will be investigated by using kappa statistics.
- f. The association between biological markers (CRP and PCT) and infiltrates will be assessed with multiple linear regression models. Transformations on markers will be applied if needed. Similar methods will be used to investigate the association between markers and the probability of pneumonia rated on the 3-level scale. The analyses will be conducted for each arm.

2) Analyses related to the treatment outcome:

- a. The cumulative incidence of antibiotic free patients will be investigated over 30 days by using a non-parametric competing risk model with death before antibiotic intake as a competing event and will be compared between arms (CXR- versus LDCT-based strategies and CXR- and LUS-based strategies).

3) Analyses related to clinical outcomes:

- a. Quality of life: it will be compared between the strategies by using a linear regression model
- b. Clinical stability: the time to clinical stability over 15 days will be assessed by Kaplan-Meier's survival curve in each arm and compared between arms with a log-rank test. Patients who die in the first 2 weeks will be censored at day 15 (i.e. considered has never reaching clinical stability).
- c. Length of stay: if appropriate the length of hospital stay will be compared between the strategies by using a linear regression.
- d. Transfer: the proportion of patients with an unplanned transfer to the ICU will be compared between arms (logistic regression model)
- e. Mortality and readmission: All-cause mortality during the 3-month follow-up will be investigated with Kaplan Meier's survival curves, and compared between the arms using a log-rank test stratified on sites. Readmissions during the 3-month follow-up will be investigated using survival models with competing risk. Death before readmission will be the competing event.

4) Cost outcomes: Mean cost per patient will be assessed and compared between arms using multiple linear regression models. Reweighted estimators will be used to account for censoring.

All relevant proportions (sensitivity, specificity, predictive values...) will be reported with the exact 95% confidence intervals assess by Clopper-Pearson method. All regression models will be adjusted for sites and tests for comparison of survival or cumulative incidence will be stratified on sites to account for the stratified randomisation. All statistical tests will two-sided with a level of 5%.

Sensitivity analyses :

- 1) As a sensitivity analysis, the primary analysis and the secondary analyses 1a) and 1b) will be repeated, whereby only the level “high” on the Likert scale is regarded as positive diagnosis (clinician’s diagnoses and reference diagnoses).
- 2) As a sensitivity analysis, the secondary analysis 2a) will be repeated excluding exacerbation of COPD, where the need for antibiotic therapy is still debated.

#### Interim and safety analyses

There will be no comparative analysis for efficacy or futility. An initial safety analysis will be performed after 200 patients have reached the 1-month follow-up. The study’s data manager will ensure that the data will be exported with “scrambled” allocation labels and that study investigators do not have access to the data. The results will be transmitted to the principal investigators and the safety monitoring board. The latter will be free to lift the blind if deemed necessary, and will be asked to make the final decision on the continuation of the study without modification, or terminating the study.

#### Sub-group analyses

The primary analysis and the secondary analyses related to the assessment of diagnostic performances (secondary analyses 1) to 4)) will be conducted in sub-groups of patients: 1) patients aged less than 80 years versus patients aged over 80 years, 2) patients with a positive PCR (i.e. detection of a virus, including SARS CoV-2) at the beginning of the study versus patients with a negative PCR.

#### Handling of missing data and drop-outs

Some patients will be discharged from the ED, but they won’t be considered as dropout patients as the diagnosis of pneumonia will be made before the discharge, and follow-up will be done by phone. Missing data that cannot be avoided will be excluded from the primary analysis (complete case analysis) and signalled as such. In addition, multiple imputation will be performed if more than 10% of data of the outcome are missing. R (R Foundation for Statistical Computing, Vienna, Austria) will be used for statistical analyses.

#### **Data management**

Data will be collected by using electronic case record forms in REDCap® software, and will be securely stored for 10 years.

#### **PATIENT AND PUBLIC INVOLVEMENT**

No patients or public have been included in the study design.

#### **ETHICS AND DISSEMINATION**

OCTOPLUS will be carried out in accordance to the research plan and the Declaration of Helsinki, the Swiss Law and Swiss regulatory authority's requirements as applicable.<sup>36 37</sup> The application has been approved by the lead committee, i.e. the ethic committee of Geneva (CEC, number 2019-01288).

Vulnerable participants will be included. Indeed, clinical studies in elderly patients are scarce, in part because informed consent is difficult to obtain due to acute confusion or permanent cognitive impairment. If the patient has his/her ability to consent in the ER, he/she will be invited to participate to the study. In case of acceptance, he/she will be asked to read and to sign the standard consent for participant. In case of absence of capacity to consent in the ER, a physician independent of the study will be sought to defend the interest of the patient and will decide if the patient will participate to the study. If appropriate, he will sign the dedicated written confirmation.

When the patient recovers his capacity during hospitalization, he will sign the standard consent for participant. Otherwise his/her the relative/legal representative will sign the dedicated consent. Consents and written confirmation of the physician independent of the study are found in appendix.

Data storage will be handled according to international standards. The CEC will receive annual safety and interim reports and be informed about study stop/end in agreement with local requirements. Risk-based monitoring will be performed by the Clinical Trial Unit, Geneva (Switzerland).

The results of the study will be disseminated through conference presentations in national and international conferences and peer-reviewed manuscripts published in open-access journals. Trial findings will be integrated into national and international guidelines. As described in the data management plan, data will be shared according to FAIR data principles and thus in a FAIR-compliant data repository.

## **DISCUSSION AND IMPLICATIONS**

The results will have an important impact for emergency medicine, general practice, and internal medicine, as the issue of the superiority of LDCT over CXR in diagnosing pneumonia in the elderly will be addressed. Confirmed superiority could profoundly affect recommendations for the diagnosis of pneumonia in elderly patients, and LDCT could become the preferred diagnostic option over CXR. This could also apply to superiority of LUS over CXR, with the added benefit of being more easily available and non-irradiating compared with LDCT.

## Acknowledgments

We thank all members of OCTOPLUS study group and the Clinical Research Center of Hôpitaux Universitaires de Genève (HUG).

## Contributors

VP has the primary responsibility for the final content.

Study concept and design : VP, WH, NG, JS, TS, AP, CC, EB.

Draft of manuscript and statistical analysis: VP, WH, NG, TS, JS, CC.

Revision of manuscript: all authors read and approved the manuscript for final publication.

Complete membership of the OCTOPLUS study group:

The leader of the group is Virginie Prendki (principal investigator).

Other members: Nicolas Garin, Christophe Combescure and in alphabetical order: Gianluca Argentieri, Christine Baumgartner, Tanja Birrenbach, Clémence Cuvelier, Olivier Groscurin, François Herrmann, Alessandro Jessula, Laurent Kaiser, Beat Lehmann, Antonio Leidi, Christophe Marti, Andrea Orlandini, Thibault Parent, Jean-Luc Reny, Xavier Roux, Frédéric Rouyer, Thomas Ruder, Max Scheffler, Guillaume Soret, Catherine Vindret, Dina Zekry, Enrico Zucconi.

Sponsor: VP (HUG)

## Funding

This study is funded by the Swiss National Science Foundation (grant number 32003B\_197398) and by the Ligue Pulmonaire Genevoise (no grant number).

**Competing interests:** None declared

**Patient and public involvement:** Patients and/or the public were not involved in the design, or conduct, or reporting or dissemination plans of this research.

**Patient consent for publication:** Not required

**Ethics approval:** Ethical approval has been obtained by the Competent Ethics Committee (CER-GE 2019-01288)



## REFERENCES

1. Kucera J. Vieillissement actif. *wwwbfsadminch/bfs/fr/homehtml* 2008
2. Ewig S, Klapdor B, Pletz MW, et al. Nursing-home-acquired pneumonia in Germany: an 8-year prospective multicentre study. *Thorax* 2012;67(2):132-8. doi: 10.1136/thoraxjnl-2011-200630 [published Online First: 2011/11/08]
3. Chami K, Gavazzi G, Carrat F, et al. Burden of infections among 44,869 elderly in nursing homes: a cross-sectional cluster nationwide survey. *J Hosp Infect* 2011;79(3):254-9. doi: 10.1016/j.jhin.2011.08.003 [published Online First: 2011/09/09]
4. Wroe PC, Finkelstein JA, Ray GT, et al. Aging population and future burden of pneumococcal pneumonia in the United States. *J Infect Dis* 2012;205(10):1589-92. doi: 10.1093/infdis/jis240 [published Online First: 2012/03/27]
5. Mandell LA, Wunderink RG, Anzueto A, et al. Infectious Diseases Society of America/American Thoracic Society consensus guidelines on the management of community-acquired pneumonia in adults. *Clinical infectious diseases : an official publication of the Infectious Diseases Society of America* 2007;44 Suppl 2:S27-72. doi: 10.1086/511159 [published Online First: 2007/02/06]
6. Woodhead M, Blasi F, Ewig S, et al. Guidelines for the management of adult lower respiratory tract infections--full version. *Clinical microbiology and infection : the official publication of the European Society of Clinical Microbiology and Infectious Diseases* 2011;17 Suppl 6:E1-59. doi: 10.1111/j.1469-0691.2011.03672.x [published Online First: 2011/11/02]
7. Aliberti S, Brambilla AM, Chalmers JD, et al. Phenotyping community-acquired pneumonia according to the presence of acute respiratory failure and severe sepsis. *Respiratory research* 2014;15:27. doi: 10.1186/1465-9921-15-27 [published Online First: 2014/03/07]
8. Black AD. Non-infectious mimics of community-acquired pneumonia. *Pneumonia (Nathan)* 2016;8:2. doi: 10.1186/s41479-016-0002-1 [published Online First: 2016/04/12]
9. Syrjala H, Broas M, Suramo I, et al. High-resolution computed tomography for the diagnosis of community-acquired pneumonia. *Clinical infectious diseases : an official publication of the Infectious Diseases Society of America* 1998;27(2):358-63. [published Online First: 1998/08/26]
10. Albaum MN, Hill LC, Murphy M, et al. Interobserver reliability of the chest radiograph in community-acquired pneumonia. PORT Investigators. *Chest* 1996;110(2):343-50. [published Online First: 1996/08/01]
11. Faverio P, Aliberti S, Bellelli G, et al. The management of community-acquired pneumonia in the elderly. *European journal of internal medicine* 2014;25(4):312-9. doi: 10.1016/j.ejim.2013.12.001 [published Online First: 2013/12/24]
12. Fernandez-Sabe N, Carratala J, Roson B, et al. Community-acquired pneumonia in very elderly patients: causative organisms, clinical characteristics, and outcomes. *Medicine* 2003;82(3):159-69. doi: 10.1097/01.md.0000076005.64510.87 [published Online First: 2003/06/07]
13. Haga T, Fukuoka M, Morita M, et al. Computed Tomography for the Diagnosis and Evaluation of the Severity of Community-acquired Pneumonia in the Elderly. *Internal medicine (Tokyo, Japan)* 2016;55(5):437-41. doi: 10.2169/internalmedicine.55.5556 [published Online First: 2016/03/05]

14. Loeb M, Carusone SC, Goeree R, et al. Effect of a clinical pathway to reduce hospitalizations in nursing home residents with pneumonia: a randomized controlled trial. *Jama* 2006;295(21):2503-10. doi: 10.1001/jama.295.21.2503 [published Online First: 2006/06/08]
15. Metlay JP, Schulz R, Li YH, et al. Influence of age on symptoms at presentation in patients with community-acquired pneumonia. *Archives of internal medicine* 1997;157(13):1453-9. [published Online First: 1997/07/14]
16. Sauter TC, Capaldo G, Hoffmann M, et al. Non-specific complaints at emergency department presentation result in unclear diagnoses and lengthened hospitalization: a prospective observational study. *Scandinavian Journal of Trauma, Resuscitation and Emergency Medicine* 2018;26(1):60. doi: 10.1186/s13049-018-0526-x
17. Hautz WE, Kämmer JE, Hautz SC, et al. Diagnostic error increases mortality and length of hospital stay in patients presenting through the emergency room. *Scandinavian Journal of Trauma, Resuscitation and Emergency Medicine* 2019;27(1):54. doi: 10.1186/s13049-019-0629-z
18. Mattsson B, Ertman D, Exadaktylos AK, et al. Now you see me: a pragmatic cohort study comparing first and final radiological diagnoses in the emergency department. *BMJ open* 2018;8(1):e020230. doi: 10.1136/bmjopen-2017-020230
19. Chandra A, Nicks B, Maniago E, et al. A multicenter analysis of the ED diagnosis of pneumonia. *The American journal of emergency medicine* 2010;28(8):862-5. doi: 10.1016/j.ajem.2009.04.014 [published Online First: 2010/10/05]
20. Kanwar M, Brar N, Khatib R, et al. Misdiagnosis of community-acquired pneumonia and inappropriate utilization of antibiotics: side effects of the 4-h antibiotic administration rule. *Chest* 2007;131(6):1865-9. doi: 10.1378/chest.07-0164 [published Online First: 2007/04/03]
21. Waterer GW. The Diagnosis of Community-acquired Pneumonia. Do We Need to Take a Big Step Backward? *American journal of respiratory and critical care medicine* 2015;192(8):912-3. doi: 10.1164/rccm.201507-1460ED [published Online First: 2015/10/16]
22. Claessens YE, Debray MP, Tubach F, et al. Early Chest Computed Tomography Scan to Assist Diagnosis and Guide Treatment Decision for Suspected Community-acquired Pneumonia. *American journal of respiratory and critical care medicine* 2015;192(8):974-82. doi: 10.1164/rccm.201501-0017OC [published Online First: 2015/07/15]
23. Prendki V, Scheffler M, Huttner B, et al. Low-dose computed tomography for the diagnosis of pneumonia in elderly patients: a prospective, interventional cohort study. *Eur Resp J* 2018;51(5) doi: 10.1183/13993003.02375-2017
24. Garin N, Marti C, Scheffler M, et al. Computed tomography scan contribution to the diagnosis of community-acquired pneumonia. *Curr Opin Pulm Med* 2019;25(3):242-48. doi: 10.1097/mcp.0000000000000567 [published Online First: 2019/02/08]
25. Soldati G, Smargiassi A, Inchingolo R, et al. Is there a role for lung ultrasound during the COVID-19 pandemic? *Journal of ultrasound in medicine : official journal of the American Institute of Ultrasound in Medicine* 2020 doi: 10.1002/jum.15284 [published Online First: 2020/03/22]

- 1
- 2
- 3 26. Llamas-Alvarez AM, Tenza-Lozano EM, Latour-Perez J. Accuracy of Lung Ultrasonography in the
- 4 Diagnosis of Pneumonia in Adults: Systematic Review and Meta-Analysis. *Chest*
- 5 2017;151(2):374-82. doi: 10.1016/j.chest.2016.10.039 [published Online First: 2016/11/08]
- 6
- 7 27. Xia Y, Ying Y, Wang S, et al. Effectiveness of lung ultrasonography for diagnosis of pneumonia in
- 8 adults: a systematic review and meta-analysis. *J Thorac Dis* 2016;8(10):2822-31. doi:
- 9 10.21037/jtd.2016.09.38 [published Online First: 2016/11/22]
- 10
- 11 28. Liu XL, Lian R, Tao YK, et al. Lung ultrasonography: an effective way to diagnose community-
- 12 acquired pneumonia. *Emergency medicine journal : EMJ* 2015;32(6):433-8. doi:
- 13 10.1136/emered-2013-203039 [published Online First: 2014/08/22]
- 14
- 15 29. Nazerian P, Volpicelli G, Vanni S, et al. Accuracy of lung ultrasound for the diagnosis of
- 16 consolidations when compared to chest computed tomography. *The American journal of*
- 17 *emergency medicine* 2015;33(5):620-5. doi: 10.1016/j.ajem.2015.01.035 [published Online
- 18 First: 2015/03/12]
- 19
- 20 30. Amatya Y, Rupp J, Russell FM, et al. Diagnostic use of lung ultrasound compared to chest
- 21 radiograph for suspected pneumonia in a resource-limited setting. *Int J Emerg Med*
- 22 2018;11(1):8. doi: 10.1186/s12245-018-0170-2 [published Online First: 2018/03/13]
- 23
- 24 31. Staub LJ, Mazzali Biscaro RR, Kaszubowski E, et al. Lung Ultrasound for the Emergency Diagnosis
- 25 of Pneumonia, Acute Heart Failure, and Exacerbations of Chronic Obstructive Pulmonary
- 26 Disease/Asthma in Adults: A Systematic Review and Meta-analysis. *The Journal of emergency*
- 27 *medicine* 2019;56(1):53-69. doi: 10.1016/j.jemermed.2018.09.009 [published Online First:
- 28 2018/10/14]
- 29
- 30 32. Ticinesi A, Lauretani F, Nouvenne A, et al. Lung ultrasound and chest x-ray for detecting pneumonia
- 31 in an acute geriatric ward. *Medicine* 2016;95(27):e4153. doi: 10.1097/md.0000000000004153
- 32 [published Online First: 2016/07/12]
- 33
- 34 33. Chan AW, Tetzlaff JM, Gøtzsche PC, et al. SPIRIT 2013 explanation and elaboration: guidance for
- 35 protocols of clinical trials. *BMJ (Clinical research ed)* 2013;346:e7586. doi: 10.1136/bmj.e7586
- 36 [published Online First: 2013/01/11]
- 37
- 38 34. Larke FJ, Kruger RL, Cagnon CH, et al. Estimated radiation dose associated with low-dose chest
- 39 CT of average-size participants in the National Lung Screening Trial. *AJR American journal of*
- 40 *roentgenology* 2011;197(5):1165-9. doi: 10.2214/ajr.11.6533 [published Online First:
- 41 2011/10/25]
- 42
- 43 35. El Moussaoui R, Opmeer BC, Bossuyt PMM, et al. Development and validation of a short
- 44 questionnaire in community acquired pneumonia. *Thorax* 2004;59(7):591-95. doi:
- 45 10.1136/thx.2003.015107
- 46
- 47 36. Declaration of Helsinki, version October, 2013. Available: [http://www.wma.net/en/](http://www.wma.net/en/30publications/10policies/b3/index.html)
- 48 [30publications/10policies/b3/index.html](http://www.wma.net/en/30publications/10policies/b3/index.html).
- 49
- 50 37. Humanforschungsgesetz, HFG Bundesgesetz über die Forschung am Menschen (Bundesgesetz
- 51 über die Forschung am Menschen, HFG) vom 30. September 2011/ Loi fédérale relative la
- 52 recherche sur l'être humain (loi relative la recherche sur l'être humain, LRH) du 30 septembre
- 53
- 54
- 55
- 56
- 57
- 58
- 59
- 60

1  
2  
3 2011. Available: <https://www.bag.admin.ch/bag/fr/home/medizin-und-forschung/forschung-am->  
4 [menschen.html](https://www.bag.admin.ch/bag/fr/home/medizin-und-forschung/forschung-am-)  
5  
6  
7  
8  
9  
10  
11  
12  
13  
14  
15  
16  
17  
18  
19  
20  
21  
22  
23  
24  
25  
26  
27  
28  
29  
30  
31  
32  
33  
34  
35  
36  
37  
38  
39  
40  
41  
42  
43  
44  
45  
46  
47  
48  
49  
50  
51  
52  
53  
54  
55  
56  
57  
58  
59  
60

For peer review only

1  
2  
3  
4  
5  
6  
7  
8  
9  
10  
11  
12  
13  
14  
15  
16  
17  
18  
19  
20  
21  
22  
23  
24  
25  
26  
27  
28  
29  
30  
31  
32  
33  
34  
35  
36  
37  
38  
39  
40  
41  
42  
43  
44  
45  
46  
47  
48  
49  
50  
51  
52  
53  
54  
55  
56  
57  
58  
59  
60

**Tables and figures**

**Table 1. Eligibility criteria**

**Table 2. Causes of unblinding in emergency**

**Table 3. Secondary outcome**

**Figure 1. Study design**

For peer review only

Figure 1.

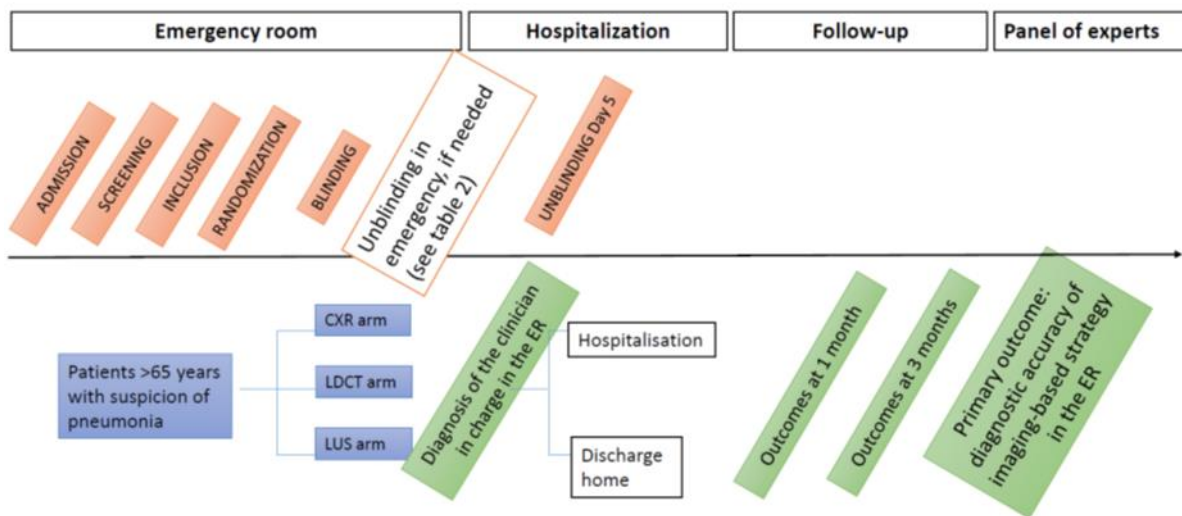

CXR = chest x-ray, LDCT = low-dose CT scan, LUS = lung ultrasonography

**Table 1 bis. Findings of the PneumO-LD-CT cohort (unpublished results). For each of the 200 participants, the probability of pneumonia was assessed by a clinician before and after LDCT. A committee of experts adjudicated the diagnosis of pneumonia.**

| <i>Clinician's estimates of the probability of pneumonia based on CXR (before LDCT)</i> | <i>Clinician's estimates of the probability of pneumonia after LDCT</i> |                    |            |
|-----------------------------------------------------------------------------------------|-------------------------------------------------------------------------|--------------------|------------|
| <b>Patients with pneumonia according to an adjudication committee (n=131)</b>           |                                                                         |                    |            |
|                                                                                         | Low                                                                     | Intermediate/ high | TOTAL      |
| Low                                                                                     | <b>1</b>                                                                | <b>6</b>           | <b>7</b>   |
| Intermediate/ high                                                                      | <b>10</b>                                                               | <b>116</b>         | <b>126</b> |
| TOTAL                                                                                   | <b>11</b>                                                               | <b>122</b>         | <b>133</b> |
| <b>Patients without pneumonia according to an adjudication committee (n=67)</b>         |                                                                         |                    |            |
|                                                                                         | Low                                                                     | Intermediate/ high | TOTAL      |
| Low                                                                                     | <b>9</b>                                                                | <b>1</b>           | <b>10</b>  |
| Intermediate/ high                                                                      | <b>37</b>                                                               | <b>20</b>          | <b>57</b>  |
| TOTAL                                                                                   | <b>46</b>                                                               | <b>21</b>          | <b>67</b>  |
| <b>Total patients (n=200)</b>                                                           |                                                                         |                    |            |

In this adjudication, the panel of experts had access to the results of LDCT to rate their probability of pneumonia, on the contrary of previous published results<sup>23</sup>.

The accuracy of clinician's diagnosis before LDCT was  $(126+10)/(133+67) = 0.68$ .

The accuracy of clinician's diagnosis after LDCT was  $(122+46)/(133+67) = 0.84$ .

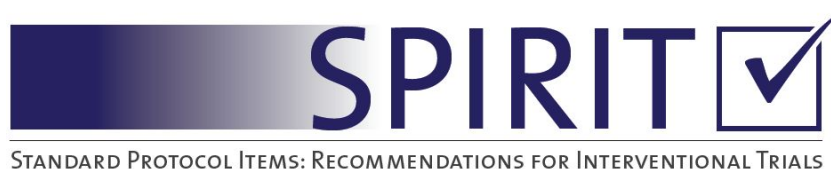

SPIRIT 2013 Checklist: Recommended items to address in a clinical trial protocol and related documents\*

| Section/item                      | Item No | Description                                                                                                                                                                                                                                                                                                |
|-----------------------------------|---------|------------------------------------------------------------------------------------------------------------------------------------------------------------------------------------------------------------------------------------------------------------------------------------------------------------|
| <b>Administrative information</b> |         |                                                                                                                                                                                                                                                                                                            |
| Title                             | 1       | Descriptive title identifying the study design, population, interventions, and, if applicable, trial acronym<br><b>Page 1</b>                                                                                                                                                                              |
| Trial registration                | 2a      | Trial identifier and registry name. If not yet registered, name of intended registry<br><b>Page 2</b>                                                                                                                                                                                                      |
|                                   | 2b      | All items from the World Health Organization Trial Registration Data Set                                                                                                                                                                                                                                   |
| Protocol version                  | 3       | Date and version identifier<br><b>Page 14 (Acknowledgments)</b>                                                                                                                                                                                                                                            |
| Funding                           | 4       | Sources and types of financial, material, and other support<br><b>Page 14</b>                                                                                                                                                                                                                              |
| Roles and responsibilities        | 5a      | Names, affiliations, and roles of protocol contributors<br><b>Page 1, 14</b>                                                                                                                                                                                                                               |
|                                   | 5b      | Name and contact information for the trial sponsor<br><b>Page 14</b>                                                                                                                                                                                                                                       |
|                                   | 5c      | Role of study sponsor and funders, if any, in study design; collection, management, analysis, and interpretation of data; writing of the report; and the decision to submit the report for publication, including whether they will have ultimate authority over any of these activities<br><b>Page 14</b> |
|                                   | 5d      | Composition, roles, and responsibilities of the coordinating centre, steering committee, endpoint adjudication committee, data management team, and other individuals or groups overseeing the trial, if applicable (see Item 21a for data monitoring committee)<br><b>Page 8</b>                          |

**Introduction**



|    |                                                           |     |                                                                               |
|----|-----------------------------------------------------------|-----|-------------------------------------------------------------------------------|
| 1  |                                                           |     |                                                                               |
| 2  | Background and                                            | 6a  | Description of research question and justification for undertaking the        |
| 3  | rationale                                                 |     | trial, including summary of relevant studies (published and                   |
| 4  |                                                           |     | unpublished) examining benefits and harms for each intervention               |
| 5  |                                                           |     | <b>Page 2</b>                                                                 |
| 6  |                                                           |     |                                                                               |
| 7  |                                                           | 6b  | Explanation for choice of comparators                                         |
| 8  |                                                           |     | <b>Page 2, 3 and 4</b>                                                        |
| 9  |                                                           |     |                                                                               |
| 10 | Objectives                                                | 7   | Specific objectives or hypotheses                                             |
| 11 |                                                           |     | <b>Page 4</b>                                                                 |
| 12 |                                                           |     |                                                                               |
| 13 | Trial design                                              | 8   | Description of trial design including type of trial (eg, parallel group,      |
| 14 |                                                           |     | crossover, factorial, single group), allocation ratio, and framework (eg,     |
| 15 |                                                           |     | superiority, equivalence, noninferiority, exploratory)                        |
| 16 |                                                           |     | <b>Page 5</b>                                                                 |
| 17 |                                                           |     |                                                                               |
| 18 |                                                           |     |                                                                               |
| 19 |                                                           |     |                                                                               |
| 20 | <b>Methods: Participants, interventions, and outcomes</b> |     |                                                                               |
| 21 |                                                           |     |                                                                               |
| 22 | Study setting                                             | 9   | Description of study settings (eg, community clinic, academic hospital)       |
| 23 |                                                           |     | and list of countries where data will be collected. Reference to where        |
| 24 |                                                           |     | list of study sites can be obtained                                           |
| 25 |                                                           |     | <b>Page 4 and 5</b>                                                           |
| 26 |                                                           |     |                                                                               |
| 27 | Eligibility criteria                                      | 10  | Inclusion and exclusion criteria for participants. If applicable, eligibility |
| 28 |                                                           |     | criteria for study centres and individuals who will perform the               |
| 29 |                                                           |     | interventions (eg, surgeons, psychotherapists)                                |
| 30 |                                                           |     | <b>Page 6 to 8</b>                                                            |
| 31 |                                                           |     |                                                                               |
| 32 |                                                           |     |                                                                               |
| 33 | Interventions                                             | 11a | Interventions for each group with sufficient detail to allow replication,     |
| 34 |                                                           |     | including how and when they will be administered                              |
| 35 |                                                           |     | <b>Page 7 and 8</b>                                                           |
| 36 |                                                           |     |                                                                               |
| 37 |                                                           |     |                                                                               |
| 38 |                                                           | 11b | Criteria for discontinuing or modifying allocated interventions for a         |
| 39 |                                                           |     | given trial participant (eg, drug dose change in response to harms,           |
| 40 |                                                           |     | participant request, or improving/worsening disease)                          |
| 41 |                                                           |     | <b>Page 27</b>                                                                |
| 42 |                                                           |     |                                                                               |
| 43 |                                                           |     |                                                                               |
| 44 |                                                           | 11c | Strategies to improve adherence to intervention protocols, and any            |
| 45 |                                                           |     | procedures for monitoring adherence (eg, drug tablet return,                  |
| 46 |                                                           |     | laboratory tests)                                                             |
| 47 |                                                           |     | <b>Page 7 (recruitment)</b>                                                   |
| 48 |                                                           |     |                                                                               |
| 49 |                                                           | 11d | Relevant concomitant care and interventions that are permitted or             |
| 50 |                                                           |     | prohibited during the trial                                                   |
| 51 |                                                           |     | <b>Page 8</b>                                                                 |
| 52 |                                                           |     |                                                                               |
| 53 |                                                           |     |                                                                               |
| 54 |                                                           |     |                                                                               |
| 55 |                                                           |     |                                                                               |
| 56 |                                                           |     |                                                                               |
| 57 |                                                           |     |                                                                               |
| 58 |                                                           |     |                                                                               |
| 59 |                                                           |     |                                                                               |
| 60 |                                                           |     |                                                                               |

|    |                      |    |                                                                                                                                                                                                                                                                                                                                                                                |
|----|----------------------|----|--------------------------------------------------------------------------------------------------------------------------------------------------------------------------------------------------------------------------------------------------------------------------------------------------------------------------------------------------------------------------------|
| 1  |                      |    |                                                                                                                                                                                                                                                                                                                                                                                |
| 2  | Outcomes             | 12 | Primary, secondary, and other outcomes, including the specific measurement variable (eg, systolic blood pressure), analysis metric (eg, change from baseline, final value, time to event), method of aggregation (eg, median, proportion), and time point for each outcome. Explanation of the clinical relevance of chosen efficacy and harm outcomes is strongly recommended |
| 3  |                      |    | <b>Page 9 and 10</b>                                                                                                                                                                                                                                                                                                                                                           |
| 4  |                      |    |                                                                                                                                                                                                                                                                                                                                                                                |
| 5  |                      |    |                                                                                                                                                                                                                                                                                                                                                                                |
| 6  |                      |    |                                                                                                                                                                                                                                                                                                                                                                                |
| 7  |                      |    |                                                                                                                                                                                                                                                                                                                                                                                |
| 8  |                      |    |                                                                                                                                                                                                                                                                                                                                                                                |
| 9  |                      |    |                                                                                                                                                                                                                                                                                                                                                                                |
| 10 |                      |    |                                                                                                                                                                                                                                                                                                                                                                                |
| 11 | Participant timeline | 13 | Time schedule of enrolment, interventions (including any run-ins and washouts), assessments, and visits for participants. A schematic diagram is highly recommended (see Figure)                                                                                                                                                                                               |
| 12 |                      |    | <b>Page 5 and 6</b>                                                                                                                                                                                                                                                                                                                                                            |
| 13 |                      |    |                                                                                                                                                                                                                                                                                                                                                                                |
| 14 |                      |    |                                                                                                                                                                                                                                                                                                                                                                                |
| 15 |                      |    |                                                                                                                                                                                                                                                                                                                                                                                |
| 16 |                      |    |                                                                                                                                                                                                                                                                                                                                                                                |
| 17 | Sample size          | 14 | Estimated number of participants needed to achieve study objectives and how it was determined, including clinical and statistical assumptions supporting any sample size calculations                                                                                                                                                                                          |
| 18 |                      |    | <b>Page 5</b>                                                                                                                                                                                                                                                                                                                                                                  |
| 19 |                      |    |                                                                                                                                                                                                                                                                                                                                                                                |
| 20 |                      |    |                                                                                                                                                                                                                                                                                                                                                                                |
| 21 |                      |    |                                                                                                                                                                                                                                                                                                                                                                                |
| 22 |                      |    |                                                                                                                                                                                                                                                                                                                                                                                |
| 23 | Recruitment          | 15 | Strategies for achieving adequate participant enrolment to reach target sample size                                                                                                                                                                                                                                                                                            |
| 24 |                      |    | <b>Page 7</b>                                                                                                                                                                                                                                                                                                                                                                  |
| 25 |                      |    |                                                                                                                                                                                                                                                                                                                                                                                |
| 26 |                      |    |                                                                                                                                                                                                                                                                                                                                                                                |

### Methods: Assignment of interventions (for controlled trials)

#### Allocation:

|    |                                  |     |                                                                                                                                                                                                                                                                                                                                                          |
|----|----------------------------------|-----|----------------------------------------------------------------------------------------------------------------------------------------------------------------------------------------------------------------------------------------------------------------------------------------------------------------------------------------------------------|
| 27 |                                  |     |                                                                                                                                                                                                                                                                                                                                                          |
| 28 |                                  |     |                                                                                                                                                                                                                                                                                                                                                          |
| 29 |                                  |     |                                                                                                                                                                                                                                                                                                                                                          |
| 30 |                                  |     |                                                                                                                                                                                                                                                                                                                                                          |
| 31 | Sequence generation              | 16a | Method of generating the allocation sequence (eg, computer-generated random numbers), and list of any factors for stratification. To reduce predictability of a random sequence, details of any planned restriction (eg, blocking) should be provided in a separate document that is unavailable to those who enrol participants or assign interventions |
| 32 |                                  |     | <b>Page 7 (randomisation)</b>                                                                                                                                                                                                                                                                                                                            |
| 33 |                                  |     |                                                                                                                                                                                                                                                                                                                                                          |
| 34 |                                  |     |                                                                                                                                                                                                                                                                                                                                                          |
| 35 |                                  |     |                                                                                                                                                                                                                                                                                                                                                          |
| 36 |                                  |     |                                                                                                                                                                                                                                                                                                                                                          |
| 37 |                                  |     |                                                                                                                                                                                                                                                                                                                                                          |
| 38 |                                  |     |                                                                                                                                                                                                                                                                                                                                                          |
| 39 |                                  |     |                                                                                                                                                                                                                                                                                                                                                          |
| 40 | Allocation concealment mechanism | 16b | Mechanism of implementing the allocation sequence (eg, central telephone; sequentially numbered, opaque, sealed envelopes), describing any steps to conceal the sequence until interventions are assigned                                                                                                                                                |
| 41 |                                  |     | <b>Page 7 (randomisation)</b>                                                                                                                                                                                                                                                                                                                            |
| 42 |                                  |     |                                                                                                                                                                                                                                                                                                                                                          |
| 43 |                                  |     |                                                                                                                                                                                                                                                                                                                                                          |
| 44 |                                  |     |                                                                                                                                                                                                                                                                                                                                                          |
| 45 |                                  |     |                                                                                                                                                                                                                                                                                                                                                          |
| 46 |                                  |     |                                                                                                                                                                                                                                                                                                                                                          |
| 47 | Implementation                   | 16c | Who will generate the allocation sequence, who will enrol participants, and who will assign participants to interventions                                                                                                                                                                                                                                |
| 48 |                                  |     | <b>Page 7 (randomisation)</b>                                                                                                                                                                                                                                                                                                                            |
| 49 |                                  |     |                                                                                                                                                                                                                                                                                                                                                          |
| 50 |                                  |     |                                                                                                                                                                                                                                                                                                                                                          |
| 51 |                                  |     |                                                                                                                                                                                                                                                                                                                                                          |
| 52 | Blinding (masking)               | 17a | Who will be blinded after assignment to interventions (eg, trial participants, care providers, outcome assessors, data analysts), and how                                                                                                                                                                                                                |
| 53 |                                  |     | <b>Page 5</b>                                                                                                                                                                                                                                                                                                                                            |
| 54 |                                  |     |                                                                                                                                                                                                                                                                                                                                                          |
| 55 |                                  |     |                                                                                                                                                                                                                                                                                                                                                          |
| 56 |                                  |     |                                                                                                                                                                                                                                                                                                                                                          |
| 57 |                                  |     |                                                                                                                                                                                                                                                                                                                                                          |
| 58 |                                  |     |                                                                                                                                                                                                                                                                                                                                                          |
| 59 |                                  |     |                                                                                                                                                                                                                                                                                                                                                          |
| 60 |                                  |     |                                                                                                                                                                                                                                                                                                                                                          |

- 1  
2  
3  
4  
5  
6  
7  
8  
9  
10  
11  
12  
13  
14  
15  
16  
17  
18  
19  
20  
21  
22  
23  
24  
25  
26  
27  
28  
29  
30  
31  
32  
33  
34  
35  
36  
37  
38  
39  
40  
41  
42  
43  
44  
45  
46  
47  
48  
49  
50  
51  
52  
53  
54  
55  
56  
57  
58  
59  
60
- 17b If blinded, circumstances under which unblinding is permissible, and procedure for revealing a participant's allocated intervention during the trial

**Page 8 (blinding)**

**Methods: Data collection, management, and analysis**

Data collection methods 18a Plans for assessment and collection of outcome, baseline, and other trial data, including any related processes to promote data quality (eg, duplicate measurements, training of assessors) and a description of study instruments (eg, questionnaires, laboratory tests) along with their reliability and validity, if known. Reference to where data collection forms can be found, if not in the protocol

**Page 9 and 10**

- 18b Plans to promote participant retention and complete follow-up, including list of any outcome data to be collected for participants who discontinue or deviate from intervention protocols

**Protocol page 27**

Data management 19 Plans for data entry, coding, security, and storage, including any related processes to promote data quality (eg, double data entry; range checks for data values). Reference to where details of data management procedures can be found, if not in the protocol

**Protocol page 13, 32 and 33**

Statistical methods 20a Statistical methods for analysing primary and secondary outcomes. Reference to where other details of the statistical analysis plan can be found, if not in the protocol

**Page 11 and 12**

- 20b Methods for any additional analyses (eg, subgroup and adjusted analyses)

**Page 12**

- 20c Definition of analysis population relating to protocol non-adherence (eg, as randomised analysis), and any statistical methods to handle missing data (eg, multiple imputation)

**Top of page 11**

**Methods: Monitoring**

Data monitoring 21a Composition of data monitoring committee (DMC); summary of its role and reporting structure; statement of whether it is independent from the sponsor and competing interests; and reference to where further details about its charter can be found, if not in the protocol.

Alternatively, an explanation of why a DMC is not needed

**Protocol page 35**

|    |                                 |     |                                                                               |
|----|---------------------------------|-----|-------------------------------------------------------------------------------|
| 1  |                                 |     |                                                                               |
| 2  |                                 | 21b | Description of any interim analyses and stopping guidelines, including        |
| 3  |                                 |     | who will have access to these interim results and make the final              |
| 4  |                                 |     | decision to terminate the trial                                               |
| 5  |                                 |     | <b>Data Safety Monitoring Board page 8</b>                                    |
| 6  |                                 |     |                                                                               |
| 7  | Harms                           | 22  | Plans for collecting, assessing, reporting, and managing solicited and        |
| 8  |                                 |     | spontaneously reported adverse events and other unintended effects            |
| 9  |                                 |     | of trial interventions or trial conduct                                       |
| 10 |                                 |     | <b>Protocol page 29 and 30</b>                                                |
| 11 |                                 |     |                                                                               |
| 12 |                                 |     |                                                                               |
| 13 | Auditing                        | 23  | Frequency and procedures for auditing trial conduct, if any, and              |
| 14 |                                 |     | whether the process will be independent from investigators and the            |
| 15 |                                 |     | sponsor                                                                       |
| 16 |                                 |     | <b>Page 35</b>                                                                |
| 17 |                                 |     |                                                                               |
| 18 |                                 |     |                                                                               |
| 19 | <b>Ethics and dissemination</b> |     |                                                                               |
| 20 |                                 |     |                                                                               |
| 21 | Research ethics                 | 24  | Plans for seeking research ethics committee/institutional review board        |
| 22 | approval                        |     | (REC/IRB) approval                                                            |
| 23 |                                 |     | <b>Page 13 and 14</b>                                                         |
| 24 |                                 |     |                                                                               |
| 25 | Protocol                        | 25  | Plans for communicating important protocol modifications (eg,                 |
| 26 | amendments                      |     | changes to eligibility criteria, outcomes, analyses) to relevant parties      |
| 27 |                                 |     | (eg, investigators, REC/IRBs, trial participants, trial registries, journals, |
| 28 |                                 |     | regulators)                                                                   |
| 29 |                                 |     | <b>Protocol page 30</b>                                                       |
| 30 |                                 |     |                                                                               |
| 31 |                                 |     |                                                                               |
| 32 | Consent or assent               | 26a | Who will obtain informed consent or assent from potential trial               |
| 33 |                                 |     | participants or authorised surrogates, and how (see Item 32)                  |
| 34 |                                 |     | <b>Page 13</b>                                                                |
| 35 |                                 |     |                                                                               |
| 36 |                                 |     |                                                                               |
| 37 |                                 | 26b | Additional consent provisions for collection and use of participant data      |
| 38 |                                 |     | and biological specimens in ancillary studies, if applicable                  |
| 39 |                                 |     | <b>Appendix</b>                                                               |
| 40 |                                 |     |                                                                               |
| 41 | Confidentiality                 | 27  | How personal information about potential and enrolled participants will       |
| 42 |                                 |     | be collected, shared, and maintained in order to protect confidentiality      |
| 43 |                                 |     | before, during, and after the trial                                           |
| 44 |                                 |     | <b>Protocol page 31</b>                                                       |
| 45 |                                 |     |                                                                               |
| 46 |                                 |     |                                                                               |
| 47 | Declaration of                  | 28  | Financial and other competing interests for principal investigators for       |
| 48 | interests                       |     | the overall trial and each study site                                         |
| 49 |                                 |     | <b>Page 14</b>                                                                |
| 50 |                                 |     |                                                                               |
| 51 | Access to data                  | 29  | Statement of who will have access to the final trial dataset, and             |
| 52 |                                 |     | disclosure of contractual agreements that limit such access for               |
| 53 |                                 |     | investigators                                                                 |
| 54 |                                 |     | <b>Protocol page 33</b>                                                       |
| 55 |                                 |     |                                                                               |
| 56 |                                 |     |                                                                               |
| 57 |                                 |     |                                                                               |
| 58 |                                 |     |                                                                               |
| 59 |                                 |     |                                                                               |
| 60 |                                 |     |                                                                               |

|    |                   |     |                                                                              |
|----|-------------------|-----|------------------------------------------------------------------------------|
| 1  |                   |     |                                                                              |
| 2  | Ancillary and     | 30  | Provisions, if any, for ancillary and post-trial care, and for               |
| 3  | post-trial care   |     | compensation to those who suffer harm from trial participation               |
| 4  |                   |     | <b>Protocol page 32</b>                                                      |
| 5  |                   |     |                                                                              |
| 6  | Dissemination     | 31a | Plans for investigators and sponsor to communicate trial results to          |
| 7  | policy            |     | participants, healthcare professionals, the public, and other relevant       |
| 8  |                   |     | groups (eg, via publication, reporting in results databases, or other        |
| 9  |                   |     | data sharing arrangements), including any publication restrictions           |
| 10 |                   |     | <b>Page 13</b>                                                               |
| 11 |                   |     |                                                                              |
| 12 |                   |     |                                                                              |
| 13 |                   | 31b | Authorship eligibility guidelines and any intended use of professional       |
| 14 |                   |     | writers                                                                      |
| 15 |                   |     | <b>Page 14</b>                                                               |
| 16 |                   |     |                                                                              |
| 17 |                   |     |                                                                              |
| 18 |                   | 31c | Plans, if any, for granting public access to the full protocol, participant- |
| 19 |                   |     | level dataset, and statistical code                                          |
| 20 |                   |     | <b>Page 13</b>                                                               |
| 21 |                   |     |                                                                              |
| 22 |                   |     |                                                                              |
| 23 | <b>Appendices</b> |     |                                                                              |
| 24 | Informed consent  | 32  | Model consent form and other related documentation given to                  |
| 25 | materials         |     | participants and authorised surrogates                                       |
| 26 |                   |     | <b>Uploaded (versions in French)</b>                                         |
| 27 |                   |     |                                                                              |
| 28 |                   |     |                                                                              |
| 29 | Biological        | 33  | Plans for collection, laboratory evaluation, and storage of biological       |
| 30 | specimens         |     | specimens for genetic or molecular analysis in the current trial and for     |
| 31 |                   |     | future use in ancillary studies, if applicable                               |
| 32 |                   |     | <b>Protocol page 24, 25 and 26</b>                                           |
| 33 |                   |     |                                                                              |

---

\*It is strongly recommended that this checklist be read in conjunction with the SPIRIT 2013 Explanation & Elaboration for important clarification on the items. Amendments to the protocol should be tracked and dated. The SPIRIT checklist is copyrighted by the SPIRIT Group under the Creative Commons "[Attribution-NonCommercial-NoDerivs 3.0 Unported](https://creativecommons.org/licenses/by-nc-nd/3.0/)" license.

# BMJ Open

## Low-dose CT cOmPared to Lung UltraSonography vs standard of care based-strategies for the diagnosis of pneumonia in the elderly: a multicentre randomised controlled trial (OCTOPLUS)

|                                 |                                                                                                                                                                                                                                                                                                                                                                                                                                                                                                                                                                                                                                                                                                                                                                                                                                                            |
|---------------------------------|------------------------------------------------------------------------------------------------------------------------------------------------------------------------------------------------------------------------------------------------------------------------------------------------------------------------------------------------------------------------------------------------------------------------------------------------------------------------------------------------------------------------------------------------------------------------------------------------------------------------------------------------------------------------------------------------------------------------------------------------------------------------------------------------------------------------------------------------------------|
| Journal:                        | <i>BMJ Open</i>                                                                                                                                                                                                                                                                                                                                                                                                                                                                                                                                                                                                                                                                                                                                                                                                                                            |
| Manuscript ID                   | bmjopen-2021-055869.R1                                                                                                                                                                                                                                                                                                                                                                                                                                                                                                                                                                                                                                                                                                                                                                                                                                     |
| Article Type:                   | Protocol                                                                                                                                                                                                                                                                                                                                                                                                                                                                                                                                                                                                                                                                                                                                                                                                                                                   |
| Date Submitted by the Author:   | 25-Jan-2022                                                                                                                                                                                                                                                                                                                                                                                                                                                                                                                                                                                                                                                                                                                                                                                                                                                |
| Complete List of Authors:       | Prendki, Virginie; Geneva University Hospitals, Division of Internal Medicine for the Aged; Geneva University Hospitals, Division of Infectious Diseases<br>Garin, Nicolas; Riviera Chablais Hospitals, Division of General Internal Medicine; Geneva University Hospitals, Department of Internal Medicine Specialties<br>Stirnemann, Jerome; Geneva University Hospitals, Department of Internal Medicine Specialties<br>Christophe, Combescure; Geneva University Hospitals<br>Platon, Alexandra; Geneva University Hospitals, Diagnostic Department, Division of Radiology<br>Bernasconi, Enos; Lugano Regional Hospital Civico Site, Division of Infectious Diseases<br>Sauter, Thomas; Inselspital University Hospital Bern, Department of Emergency Medicine<br>Hautz, Wolf; Inselspital University Hospital Bern, Department of Emergency Medicine |
| <b>Primary Subject Heading</b>: | Emergency medicine                                                                                                                                                                                                                                                                                                                                                                                                                                                                                                                                                                                                                                                                                                                                                                                                                                         |
| Secondary Subject Heading:      | Medical management, Emergency medicine, Diagnostics, Infectious diseases, Geriatric medicine                                                                                                                                                                                                                                                                                                                                                                                                                                                                                                                                                                                                                                                                                                                                                               |
| Keywords:                       | Thoracic medicine < INTERNAL MEDICINE, Respiratory infections < THORACIC MEDICINE, GERIATRIC MEDICINE                                                                                                                                                                                                                                                                                                                                                                                                                                                                                                                                                                                                                                                                                                                                                      |
|                                 |                                                                                                                                                                                                                                                                                                                                                                                                                                                                                                                                                                                                                                                                                                                                                                                                                                                            |

SCHOLARONE™  
Manuscripts

1  
2  
3 **LOw-dose CT cOmPared to Lung UltraSonography vs standard of care based-strategies for the**  
4 **diagnosis of pneumonia in the elderly: a multicentre randomised controlled trial (OCTOPLUS)**  
5

6 Virginie Prendki<sup>1,2</sup>, Nicolas Garin<sup>3,4</sup>, Jerome Stirnemann<sup>4</sup>, Christophe Combescure<sup>5</sup>, Alexandra Platon<sup>6</sup>,  
7 Enos Bernasconi<sup>7</sup>, Thomas C. Sauter<sup>8</sup>, Wolf E. Hautz<sup>8</sup> and the OCTOPLUS study group  
8  
9

10 1 Division of Internal Medicine for the Aged, Geneva University Hospitals, Thônex, Switzerland  
11

12 2 Division of Infectious Diseases, Geneva University Hospitals, Geneva, Switzerland  
13

14 3 Division of General Internal Medicine, Riviera Chablais Hospitals, Rennaz, Switzerland  
15

16 4 Department of Internal Medicine Specialties, Geneva University Hospitals, Geneva, Switzerland  
17

18 5 Department of Health and Community Medicine, University Hospitals of Geneva, Geneva, Switzerland  
19

20 6 Diagnostic Department, Division of Radiology, Geneva University Hospitals, Geneva, Switzerland  
21

22 7 Division of Infectious Diseases, Regional Hospital Lugano, University of Southern Switzerland,  
23 Lugano, Switzerland  
24

25 8 Department of Emergency Medicine, Inselspital University Hospital Bern, Bern, Switzerland  
26  
27  
28  
29  
30  
31

32 **Correspondence**  
33

34 Virginie Prendki, MD  
35

36 Division of Internal Medicine for the Aged, and Division of Infectious Diseases, Geneva University  
37 Hospitals and University of Geneva  
38

39 Hôpital des Trois-Chêne, Chemin du Pont-Bochet 3, 1226 Thônex-Genève, Switzerland  
40

41 Tel: +41795538308  
42

43 Email: virginie.prendki@hcuge.ch  
44  
45  
46  
47  
48  
49  
50  
51  
52  
53  
54  
55  
56  
57  
58  
59  
60

## Structured abstract

**Introduction:** Pneumonia is a leading cause of mortality and a common indication for antibiotic in elderly patients. However, its diagnosis is often inaccurate. We aim to compare the diagnostic accuracy, the clinical and cost outcomes and the use of antibiotics associated with three imaging strategies in patients >65 years old with suspected pneumonia in the emergency room (ER): Chest-X ray (CXR, standard of care), low-dose CT scan (LDCT) or lung US (LUS).

**Methods and analysis:** This is a multicenter randomized superiority clinical trial with three parallel arms. Patients will be allocated in the ER to a diagnostic strategy based on either CXR, LDCT, or LUS. All three imaging modalities will be performed but the results of two of them will be masked during 5 days to the patients, the physicians in charge of the patients and the investigators according to random allocation. The primary objective is to compare the accuracy of LDCT vs CXR- based strategies. As secondary objectives, antibiotics prescription, clinical and cost outcomes will be compared, and the same analyses repeated to compare the LUS and CXR strategies. The reference diagnosis will be established *a posteriori* by a panel of experts. Based on a previous study, we expect an improvement of 16% of the accuracy of pneumonia diagnosis using LDCT instead of CXR. Under this assumption, and accounting for 10% of drop out, the enrolment of 495 patients is needed to prove the superiority of LDCT over CRX (alpha error =0.05, beta error=0.10).

**Impact of the study:** Superiority of the LDCT or LUS strategy over CXR would affect recommendations for the diagnosis of pneumonia in elderly patients. A higher accuracy of one of the strategies may decrease antibiotics overuse and lead to better outcomes and reduced costs.

**Ethics and dissemination:** Ethical approval: CER Geneva 2019-01288. Trial registration number: NCT04978116.

## Strengths and limitations of this study

### Strengths:

-Direct comparison of chest X-ray-, low-dose CT scanner- and ultrasound-based strategies for the diagnosis of pneumonia in a randomized trial

-All three imaging modalities obtained in all patients irrespective of randomization arm, thus minimizing information bias

-Standardization of ultrasound conduct and interpretation

### Weakness:

The primary outcome (difference in accuracy) is not a clinical outcome.



## INTRODUCTION

By 2050, one in four people in Europa and Northern America will be aged 65 years or over according to demographic projections.<sup>1</sup> Pneumonia principally affects older people, with two thirds of patients hospitalized for pneumonia aged more than 70 years.<sup>2</sup> Accordingly, the burden of pneumonia on health and economic outcomes is expected to increase. Pneumonia is also the most frequent cause of antimicrobial therapy prescription in this population.<sup>3 4</sup> However, studies specifically investigating the elderly are scarce.

### Diagnosis of pneumonia

According to international guidelines, the diagnosis of pneumonia is based on suggestive clinical signs and symptoms and the presence of a new infiltrate on chest X-ray (CXR).<sup>5 6</sup> However, signs and symptoms of pneumonia have poor sensitivity and specificity in older patients who often present with unspecific complaints. There is a significant overlap in the clinical presentation between pneumonia and other respiratory or infectious conditions frequently present in the elderly like acute heart failure, chronic obstructive pulmonary disease exacerbation, and non-respiratory sepsis. As for the radiologic demonstration of an acute lung infiltrate, the elderly have a higher prevalence of pre-existing cardiac, pulmonary, and thoracic wall diseases complicating the interpretation of radiologic studies. Moreover, several diseases can simultaneously affect the same individual.<sup>7 8</sup> Obtaining good quality radiographs can be challenging in this population and CXR also lacks sensitivity to detect pneumonia, which exposes patients to the risk of late initiation of appropriate antibiotic treatment.<sup>9</sup> All these issues may lead to a high prevalence of diagnostic errors, delays in the correct management of patients' conditions, overprescription of antimicrobial drugs and finally poor patients' outcome.<sup>10-18</sup> This translates in a positive predictive value of only 60% to 75% for an initial diagnosis of community-acquired pneumonia in hospitalized patients when compared with the final diagnosis.<sup>19 20</sup> Misdiagnosis of pneumonia may translate in harmful delays in the correct management of the real cause of patients' symptoms, an understudied issue. Alternative imaging strategies have been proposed to surpass the acknowledged drawbacks of the current diagnostic work-up of pneumonia.

### Thoracic computed tomography scan

The use of computed tomography (CT) scan is sometimes recommended when standard imaging is inconclusive.<sup>9 21</sup> In a cohort of 319 adult patients with suspected pneumonia, Claessens et al reported that early CT scan changed the diagnostic classification of pneumonia in 59%.<sup>22</sup> Modification of pneumonia probability (mostly, but not only, downgrading of the probability of pneumonia) was concordant with the final classification of an adjudication committee in 80%. The absolute Net Reclassification Improvement was 60/319 (18%). The authors also demonstrated the feasibility of rapidly obtaining a CT scan in the emergency room (ER) settings for patients suspected of pneumonia.

Similar results were obtained for elderly patients in the monocentric PneumO-LD-CT cohort, which included patients aged 65 years and older with suspected pneumonia treated with antibiotics.<sup>23</sup> All of them had a CXR followed by a low-dose CT-scan. The clinician in charge of the patients assessed the probability of pneumonia before and after the LDCT. The main outcome was the difference of probability

1  
2  
3 of pneumonia according to the clinician in charge before and after LDCT. Among 200 patients (median  
4 age 84 years, IQR: 79-90), performing an LDCT immediately after admission led to Net Reclassification  
5 Improvement in 16/200 patients (8%) (reference diagnosis adjudicated *a posteriori* by a panel of experts,  
6 blinded for the results of LDCT). Correct reclassification was mainly observed in patients not having  
7 pneumonia, suggesting that low-dose CT (LDCT) would mainly reduce the overdiagnosis of pneumonia  
8 in this population.<sup>24</sup>  
9  
10

11  
12 The advantages of a CT scan-based strategy could be greater in elderly patients as it can be challenging  
13 to obtain good quality CXR and, as mentioned above, pneumonia can be difficult to distinguish from  
14 other frequent conditions. Native LDCT is appropriate to study the lung fields, is free of risks associated  
15 with contrast medium injection, and the irradiation burden is low.  
16  
17

### 18 **Lung ultrasonography**

19  
20 Lung ultrasonography (LUS) is another imaging modality under investigation for the diagnosis of  
21 pneumonia. LUS has significant advantages, being increasingly available, non-irradiating, easy to  
22 perform directly at the bedside, and is increasingly done by trained emergency physicians. LUS  
23 realisation can be taught quickly.<sup>25</sup> Its main drawback is the operator-dependent accuracy. Diagnostic  
24 studies evaluating LUS have reported a sensitivity of 80% to 90% and a specificity of 70% to 90% in  
25 pneumonia, using various reference standards.<sup>26-29</sup> In studies using CT scan as the reference standard,  
26 LUS showed a higher sensitivity than CXR, with similar specificity.<sup>29 30</sup> However, LUS has never been  
27 compared with CXR and LDCT for the diagnosis of pneumonia in a randomized controlled study, and  
28 data on its performance in elderly patients are scarce.<sup>31 32</sup> In a non-randomized monocentric study  
29 including patients hospitalized for a pneumonia in an acute geriatric ward, Ticinesi and colleagues  
30 showed that LUS was more accurate than CXR (AUC of 0.90, 95% confidence interval [CI] 0.83–0.96  
31 vs 0.67, 95%CI 0.60–0.74, P<0.001), particularly in frail patients.<sup>32</sup> A recent review emphasized the  
32 possible advantages of LUS in geriatrics, including the fact that it is little affected by age-related changes  
33 of lower respiratory tract and mobility limitations. The authors further emphasised the urgent need to  
34 perform studies focused on elderly patients.<sup>33</sup>  
35  
36  
37  
38  
39  
40  
41  
42

### 43 **Rationale for the study**

44  
45 On these premises, a LDCT or LUS-based work-up for suspected pneumonia may have significant  
46 advantages over a standard CXR-based strategy. Superior diagnostic accuracy of either modality may  
47 lead to better short-term outcomes through early appropriate management of the disease causing the  
48 symptoms; to more appropriate antibiotic prescription; and to less additional diagnostic tests ordered.  
49 However, the impacts of reduced false positive and false negative diagnoses on costs, prognosis and  
50 quality of life should be assessed, along with costs associated with the three imaging modalities. Only  
51 a randomized trial comparing each diagnostic strategy head to head can allow for a reliable comparison  
52 of strategies' performance.  
53  
54  
55  
56

57 Based on the results of our previous PneumO-LD-CT study, we hypothesize that a LDCT-based  
58 diagnostic strategy will have better accuracy than the standard of care CXR-based strategy for the  
59 diagnosis of pneumonia in elderly patients admitted to the ER.<sup>23</sup> This could translate in better clinical  
60

1  
2  
3 and cost outcomes and less inappropriate use of antibiotics. The same could be true if a LUS-based  
4 strategy is more accurate than the CXR-based strategy.  
5

## 6 **METHODS AND ANALYSIS**

### 7 **Setting**

8  
9  
10 This study will be conducted in three academic hospitals and one tertiary care hospital in Switzerland:  
11 Geneva University Hospitals, Geneva; Inselspital, Bern; Regional Hospital Lugano, Lugano; and Riviera  
12 Chablais Hospital, Rennaz.  
13  
14

### 15 **Study design**

16  
17  
18 We used the Standard Protocol Items: Recommendations for Interventional Trials (SPIRIT) checklist  
19 when writing our protocol.<sup>34</sup>  
20

21 This is a multicenter randomized superiority clinical trial with three parallel arms aiming to compare the  
22 accuracy of imaging-based strategies for diagnosis of pneumonia in elderly patients admitted to the ER  
23 (figure 1).  
24

25  
26 Each patient will be randomly allocated in the ER to one of the three imaging examination (CXR, LDCT  
27 or LUS), which will be immediately performed, interpreted by one of two independent radiologists (one  
28 for CXR and one for LDCT) or by an independent emergency physician trained in ultrasonography (LUS)  
29 and reported in a standardized form. The physician in charge of the patient will have access to the  
30 imaging examination and the corresponding report, in addition to usual clinical and biological data  
31 obtained in the diagnostic work-up of suspected pneumonia; he/she will be asked to assess the  
32 probability of pneumonia before the patient is discharged from the ER.  
33  
34  
35  
36

37 For each patient, the two other imaging examinations will also be performed and interpreted as  
38 described above, but the physician in charge of the patient will be blinded to these results. The results  
39 of all three imaging examinations and the interpretation will however be available to the panel of experts,  
40 whose final diagnosis of pneumonia will be the reference diagnosis for the study.  
41  
42

43 This study is carried out in an emergency setting. Pneumonia is a major cause of morbidity and mortality,  
44 and diagnosing and the decision of treating the patient consulting the ED must be performed within the  
45 first hours. Indeed international guidelines recommend treating the patient for a suspicion of pneumonia  
46 while he/she is still in the ED.  
47  
48

49 All enrolled patients will be followed up by study staff during hospitalization and by phone at month 1  
50 and 3.  
51  
52

### 53 **Sample size**

54  
55 The sample size calculation was based on the accuracy of diagnostic strategies for pneumonia  
56 assessed in the PneumO-LD-CT cohort (unpublished results, supplementary file 1). In this study, the  
57 accuracy of the clinician's diagnosis was 68% when based on CXR and 84% when based on LDCT.  
58  
59  
60

1  
2  
3 With an expected improvement of 16% of the accuracy using LDCT instead of CXR, 150 patients will  
4 be required in each arm to demonstrate the superiority of LDCT over CXR with a two-sided alpha error  
5 of 0.05 and a power of 90%. Allowing for a 10% dropout after randomization, the final recruitment  
6 objective is 165 patients in each arm, for a total of 495 patients.  
7  
8  
9  
10  
11  
12  
13  
14  
15  
16  
17  
18  
19  
20  
21  
22  
23  
24  
25  
26  
27  
28  
29  
30  
31  
32  
33  
34  
35  
36  
37  
38  
39  
40  
41  
42  
43  
44  
45  
46  
47  
48  
49  
50  
51  
52  
53  
54  
55  
56  
57  
58  
59  
60

For peer review only

## Patient population

Patients aged >65 years consulting in the ER with suspected community acquired pneumonia (CAP) or nursing-home acquired pneumonia. Any patients admitted to the ER will be included in the study if eligible according pre-specified criteria. They may be referred by a doctor, an ambulance, a relative, or come on their own initiative.

## Eligibility criteria

Eligible patients will be patients aged >65 years consulting in the ER with suspected pneumonia. At least one respiratory symptom and one sign or laboratory finding compatible with infection are required (details in table 1). In the oldest old (patients aged 80 years or older), the presence of acute delirium or unexplained acute fall can substitute for the presence of either the respiratory or the infectious symptoms.

Inclusion and exclusion criteria are listed in details in table 1.

Patients with suspicion of bacterial, viral or aspiration pneumonia will be included on a non-preferential basis. Patients with a current diagnosis of pneumonia or a chest imaging obtained during the recent episode will be excluded, as well as those with a recent diagnosis of COVID-19 -to minimize the overrepresentation of COVID cases in the cohort-. Patients with hospital-acquired pneumonia will be excluded.

**Table 1. Eligibility criteria**

| <b>Inclusion criteria</b>                                                                                                                                                                                                                                                                                                                                                                                                                                                                                       |
|-----------------------------------------------------------------------------------------------------------------------------------------------------------------------------------------------------------------------------------------------------------------------------------------------------------------------------------------------------------------------------------------------------------------------------------------------------------------------------------------------------------------|
| Age >65 years                                                                                                                                                                                                                                                                                                                                                                                                                                                                                                   |
| Suspected community acquired pneumonia (CAP) or nursing-home acquired pneumonia with :<br>-At least one respiratory symptom (new or increasing cough or dyspnoea, purulent sputum, pleuritic chest pain, respiratory rate >20/min, focal auscultatory findings or oxygen saturation <90% on room air)<br>-AND at least one sign or laboratory finding compatible with an infection (temperature >37.8°C or <36.0°C, CRP >10 mg/L, PCT >0.25 µg/L, leukocyte count >10 G/L with >85% neutrophils or band forms). |
| Signed informed consent                                                                                                                                                                                                                                                                                                                                                                                                                                                                                         |
| In the oldest old (patients aged 80 years or older), the presence of acute delirium or unexplained acute fall can substitute for the presence of either the respiratory or the infectious symptom                                                                                                                                                                                                                                                                                                               |
| <b>Exclusion criteria</b>                                                                                                                                                                                                                                                                                                                                                                                                                                                                                       |
| Immediate admission to the intensive care unit (ICU)                                                                                                                                                                                                                                                                                                                                                                                                                                                            |
| Pneumonia in the past 3 months                                                                                                                                                                                                                                                                                                                                                                                                                                                                                  |
| Positive PCR for SARS-CoV-2 or antigenic test within 3 past weeks and at the arrival in the ER                                                                                                                                                                                                                                                                                                                                                                                                                  |
| Transfer from another hospital with a diagnosis of pneumonia                                                                                                                                                                                                                                                                                                                                                                                                                                                    |

|    |                                                              |
|----|--------------------------------------------------------------|
| 1  | Thoracic CXR or CT scan or US during the present episode     |
| 2  |                                                              |
| 3  | Immediate contrast-enhanced thoracic CT scan needed          |
| 4  |                                                              |
| 5  | Advanced care planning limiting therapy to comfort care only |
| 6  |                                                              |
| 7  | Prisoners                                                    |
| 8  |                                                              |
| 9  | Patients with known uncontrolled psychiatric disorders       |
| 10 |                                                              |
| 11 | Previous enrollment into the current study                   |
| 12 |                                                              |

### 13 Recruitment

14 At the ER of each recruiting site, dedicated research staff will screen admissions and ask suitable  
15 patients for participation in the study. In addition, triage nurses and physicians working at the ER will be  
16 asked to call research staff when identifying any potential participant.

17 Due to the high complexity of the inclusion process and of the simultaneous realisation of three imaging  
18 modalities, the patients will only be included during working hours.

19 The inclusions began on June 2021 and in the study is planned to last until August 2023. However,  
20 recruitment may be extended if necessary, in particular in view of the COVID-19 pandemic interfering  
21 with inclusions in times of high demands on emergency departments.

### 22 Randomisation

23 Patients will be randomised using Research Electronic Data Capture (REDCap®) tool, a secured web-  
24 based application designed to support data capture and randomisation for research studies.  
25 Randomization will be done immediately after inclusion, stratified by centre and using permuted block  
26 sizes.

### 27 Interventions

28 The 3 images can be performed in random order and order will depend on the availability of the clinician  
29 practicing LUS. However, images will be obtained in the shortest time possible to avoid any significant  
30 impact on patient's care.

31 Standard of care: CXR will be done preferentially standing and with 2 incidences, which is the  
32 recommended and most commonly used diagnostic imaging modality for pneumonia in guidelines.<sup>5 6</sup>

33 LDCT scan will be obtained without administration of intra-venous contrast. Its performance lasts 10  
34 minutes. Mean radiation exposure is 1.5 +/- 0.47 mSv, to be compared with a mean exposure of 0.05  
35 +/- 0.03 mSv for conventional CXR, 7 mSv for a full-dose CT scan, and to Switzerland's natural  
36 background radiation level of 4 mSv/year.<sup>35</sup> LDCT and CXR will be interpreted by two independent  
37 radiologists who will not be allowed to communicate.<sup>22</sup>

38 LUS will be performed at bedside by a trained physician not involved in management of the patient,  
39 using the device available in the corresponding ER (models and commercial brand may differ between  
40 different ER). All physicians performing the LUS (thereafter: sonographers) will be board-certified in the  
41 realization of Point-Of-Care Ultrasonography (POCUS). To enhance homogeneity of LUS reporting,  
42

1  
2  
3 physicians performing LUS will be trained to use the standardized report form before the beginning of  
4 inclusions, using a common protocol agreed upon by all site investigators. All examiners will have  
5 participated in a joint POCUS workshop to standardize the use of the study protocol and practice and  
6 their years of practice will be recorded.  
7  
8

### 9 **Blinding/unblinding procedure**

10  
11 The two masked radiological examinations will be concealed to the physicians caring for the patients  
12 during 5 days.  
13

14  
15 As soon as the randomization has been conducted, research staff will know which tests to blind. Those  
16 will be sent to a research PACS instead of the electronic health records with the help of the local IT  
17 team. Furthermore, the radiologists or sonographer who perform/interpret the tests will be asked not to  
18 communicate with each other. Research staff will be present throughout the process to ensure a smooth  
19 conduct of the study.  
20  
21

22  
23 Emergency unblinding will be allowed in case of identification of an immediately life-threatening finding  
24 (table 2). In this occurrence, the radiologist or ultrasonographer will make an emergent call to the  
25 investigator before communicating the results to the clinician.  
26

27  
28 The clinician in charge of the patient will be allowed to prescribe any new imaging deemed necessary  
29 in case of later clinical deterioration (eg. full dose chest CT scan with intravenous contrast for suspected  
30 pulmonary embolism).  
31

32  
33 At day 5, research staff will unmask all radiological examinations along with the standardized reports in  
34 the patient's medical record.  
35  
36

37 **Table 2. Reasons for emergency unblinding**

|                                                            |
|------------------------------------------------------------|
| 38 Pneumothorax                                            |
| 39 Haemothorax                                             |
| 40 Indirect signs of aortic dissection                     |
| 41 Indirect signs of aneurysmal rupture (haemomediastinum) |
| 42 Massive pericardial effusion                            |
| 43 Tracheal foreign body                                   |
| 44 Pneumoperitoneum                                        |
| 45 Pneumomediastinum                                       |
| 46 Malignant airway obstruction                            |
| 47 Suspected acute tuberculosis                            |

### 48 **Reference diagnosis**

49  
50 A panel of experts composed of senior clinicians and board-certified specialists, including internists,  
51 geriatricians, infectious diseases specialists and radiologists, blinded to the allocation arm and the  
52 probability of pneumonia estimated by the clinician in charge, will rate prospectively and *a posteriori* the  
53  
54  
55  
56  
57  
58  
59  
60

1  
2  
3 probability of pneumonia. They will be trained before the adjudication process and asked to follow  
4 international guidelines for the diagnosis of pneumonia. They will have access to all available but de-  
5 identified patient data present in the medical records, including clinical data, biological, microbiological  
6 data –as results of PCR viral detection on naso-pharyngeal swabs- and images of CXR, LDCT, LUS  
7 and corresponding reports, hospital notes, and the final medical report. Each patient's diagnosis of  
8 pneumonia will be analysed using a Delphi method as follows: each expert will give an individual opinion  
9 on the probability of pneumonia on a 3-point Likert scale (low, intermediate, high). Next, each expert will  
10 re-examine the cases where there was a disagreement between expert ratings, in full knowledge of the  
11 other experts' first decisions. Finally, the adjudication committee will make consensus decisions in a  
12 plenary session and in the presence of a radiologist. The adjudication committee's final decision will be  
13 considered as the reference diagnosis.  
14  
15  
16  
17  
18

### 19 **Data safety monitoring board**

20  
21 A safety analysis will be performed after 200 patients have completed the 1-month follow-up. Safety  
22 outcomes will be: unplanned transfer to the ICU and 1-month mortality. Based on this analysis, the data  
23 safety monitoring board can recommend to discontinue one arm or all arms of the trial. No interim  
24 analysis for futility or superiority is planned.  
25  
26  
27  
28  
29

## 30 **OBJECTIVES**

### 31 **Comparison between CXR- and LDCT-based diagnostic strategies for:**

- 32 - Diagnostic performance, including accuracy (**primary outcome**), sensitivity, specificity, positive and  
33 negative predictive value and likelihood ratio
- 34 - Treatment and management (antibiotic prescription and additional imaging)
- 35 - Clinical outcomes (including length of stay, mortality, quality of life)
- 36 - Cost per patient:

37  
38  
39  
40  
41  
42  
43  
44 Cost outcomes are defined as costs within the hospital calculated using a Swiss standard called  
45 REKOLE (<https://rekole.hplus.ch/fr/produkt/rekole-comptabilite-analytique-a-lhopital/>).

46  
47  
48 The main costs components are: nursing care, physician, imaging, laboratory, treatment (including  
49 antibiotic therapy) and others per patient during hospitalization, health related quality of life at 3 months;  
50 unit of work consumption per hospital (number of minutes of care, physician, laboratory and imaging  
51 points) up to 3 months.  
52  
53

### 54 **Comparison between CXR- and LUS-based diagnostic strategies (secondary objectives) for the 55 same outcomes as above**

### 56 **Comparison between LDCT- and LUS based diagnostic strategies (secondary objectives) for the 57 same outcomes as above**



Other secondary objectives:

- Association between biomarkers and imaging-based diagnosis
- Factors of the physician (such as experience or gender), of the patient (such as urgency or presenting complaint) and of the context such as daytime affecting physician confidence in their diagnosis (CIRCUS substudy for Calibration of reasoning confidence in uncertain situations).
- Calibration of physician confidence with their actual diagnostic accuracy (CIRCUS)

## OUTCOMES

Primary outcome: diagnostic accuracy of imaging-based strategies, CXR, LDCT and LUS, at the end of the ER evaluation, using the expert panel as the reference standard.

Secondary outcomes are summarized in table 3.

**Table 3. Secondary outcomes**

| <b>Diagnostic outcomes parameters and measurement</b>                       |                                                                                                                     |
|-----------------------------------------------------------------------------|---------------------------------------------------------------------------------------------------------------------|
| Sensitivity and specificity of imaging-based strategies (CXR, LDCT and LUS) | Using panel of experts as reference                                                                                 |
| Unmasked imaging modalities in emergency                                    | Number of unmasked imaging results (reasons shown in table 2)                                                       |
| Alternative diagnoses                                                       | Standardized report at the ER                                                                                       |
| Diagnosis of aspiration pneumonia                                           | Diagnosis of panel of experts                                                                                       |
| Diagnosis of viral pneumonia                                                | Diagnosis of panel of experts                                                                                       |
| Additional imaging studies ordered                                          | Number of additional CXR, thoracic CT scan and US prescribed by the clinician during the acute setting              |
| Biological markers                                                          | C-reactive protein, procalcitonin at admission                                                                      |
| <b>Treatment outcomes parameters and measurement</b>                        |                                                                                                                     |
| Antibiotic free days at day 30 (for any indication)                         | By phone or patient record                                                                                          |
| <b>Clinical outcomes parameters and measurement</b>                         |                                                                                                                     |
| Quality of life                                                             | EQ-5D-3L questionnaire and CAP score questionnaire <sup>36</sup> (pneumonia-specific quality of life questionnaire) |
| Length of hospital stay                                                     | Patient record                                                                                                      |
| Transfer to rehabilitation or long term care facility                       | Patient record                                                                                                      |
| Transfer to the intensive care unit                                         | Patient record                                                                                                      |

|                                                 |                                                                    |
|-------------------------------------------------|--------------------------------------------------------------------|
| All cause mortality and readmission             | Patient record, follow-up                                          |
| <b>Cost outcomes parameters and measurement</b> |                                                                    |
| Costs                                           | Hospital financial database using the Swiss standard called REKOLE |

## Outcome assessment

### Primary outcome

The primary outcome is the accuracy of the clinician's diagnosis using the experts' diagnosis as reference. The probability of pneumonia will be rated by the clinician, before the patient is discharged from the ER, on a 3-level Likert scale ("low", "intermediate" or "high"). The probability of pneumonia will be rated by the panel of experts *a posteriori* on the same scale. For the primary outcome, a diagnosis of pneumonia will be positive if the probability is rated "intermediate" or "high" and negative if the probability is rated "low". The accuracy will be the proportion of patients with a clinician's diagnosis (either negative or positive) matching with the panel of experts' diagnosis which is considered as the reference. Grouping the levels "intermediate" or "high" makes sense from a medical decision making perspective since a patient rated "intermediate" will be treated with antibiotics in the same way as a patient rated "high". In a secondary analysis, the diagnosis of pneumonia will be considered positive only if the probability is rated "high".

### Secondary outcomes (see table 3)

#### Safety outcomes

The research staff will report any transfer to the ICU. All-cause mortality will be determined at 1 month (from the civil registry if necessary).

**For the study schedule, see table 4.**

**Table 4. Timeline of patient enrolment/allocation, interventions, and assessments**

| Study periods                      | Screening | Randomization | Discharge from ER | Discharge from the acute setting | Day 30 | Day 90 | Reference diagnosis |
|------------------------------------|-----------|---------------|-------------------|----------------------------------|--------|--------|---------------------|
| Visit                              | 1         | 2             | 3                 | 4                                | 5      | 6      | 7                   |
| Time (hour, day)                   | hr0       | hr2*          | hr6*              | dx                               | d30    | d90    |                     |
| Demographics                       | x         |               |                   |                                  |        |        |                     |
| Medical history                    | x         |               |                   |                                  |        |        |                     |
| In-/exclusion criteria             | x         |               |                   |                                  |        |        |                     |
| Physical examination               | x         |               |                   |                                  |        |        |                     |
| Vital signs                        | x         |               |                   |                                  |        |        |                     |
| Laboratory tests                   | x         |               |                   | x                                |        |        |                     |
| CXR, LDCT, LUS                     |           | x             |                   |                                  |        |        |                     |
| Main diagnosis before ER discharge |           |               | x                 |                                  |        |        | x                   |
| Other diagnosis outcomes           |           |               | x                 | x                                |        |        | x                   |
| No. of antibiotic free days        |           |               |                   |                                  | x      |        |                     |
| Clinical, safety and cost outcomes |           |               |                   | x                                | x      |        |                     |
| Readmission and mortality          |           |               |                   |                                  | x      | x      |                     |
| QoL questionnaire                  |           |               |                   | x                                | x      | x      |                     |
| Panel of experts                   |           |               |                   |                                  |        |        | x                   |

CXR: chest x-ray, d: day, hr: hour, \*: approximately, LDCT: low-dose computed tomography, LUS: lung ultrasonography, ER: emergency room, QoL: quality of life

## STATISTICAL METHODS

We hypothesize that the diagnostic accuracy will be higher with the LDCT-based strategy than with CXR-based strategy. The null hypothesis that will be tested in the primary analysis is the equality of accuracy with these two strategies.

### Population analysis

The analysis will follow the intention to treat principle. A sensitivity analysis will be conducted on the per protocol population (i.e. excluding patients for whom an imaging or its standardized report which should have been masked has been available to the clinician who assesses the probability of pneumonia at the ER).

### Primary analysis

The proportions of correctly classified patients in the LDCT and CXR arms will be calculated with 95% Clopper-Pearson confidence intervals (CIs), and will be compared with a logistic regression model adjusted for sites to account for the stratified randomization. The statistical test will be two-sided and the significance threshold will be 0.05.

### Secondary analyses

1  
2  
3 1) Analyses related to diagnostic outcomes:

- 4 a. The primary analysis will be repeated to compare CXR- and LUS-based strategies  
5  
6 b. Sensitivity, specificity, predictive values and likelihood ratios will be assessed by arm.  
7 Sensitivity (respectively specificity) will be compared between strategies (logistic regression  
8 model).  
9  
10 c. The proportions of imaging results needing unmasking and of additional radiological studies  
11 (and invasive procedures) during the hospitalisation will be compared between strategies  
12 (logistic regression model).  
13  
14 d. The proportion of patients with an alternative diagnosis consistent between clinicians and  
15 experts will be compared between strategies (logistic regression model).  
16  
17 e. Interagreement rate for the probability of pneumonia rated on a 3-level Likert scale: the  
18 agreement between raters participating to the trial and a consensus of experts in thoracic  
19 imaging will be investigated by using kappa statistics.  
20  
21 f. The association between biological markers (C-reactive protein, procalcitonin) and  
22 infiltrates will be assessed with multiple linear regression models. Transformations on  
23 markers will be applied if needed. Similar methods will be used to investigate the association  
24 between markers and the probability of pneumonia rated on the 3-level scale. The analyses  
25 will be conducted for each arm.  
26  
27  
28

29 2) Analyses related to the treatment outcome:

- 30 a. The cumulative incidence of antibiotic free patients will be investigated over 30 days by  
31 using a non-parametric competing risk model with death before antibiotic intake as a  
32 competing event and will be compared between arms (CXR- versus LDCT-based strategies  
33 and CXR- and LUS-based strategies).  
34  
35

36 3) Analyses related to clinical outcomes:

- 37 a. Quality of life: it will be compared between the strategies by using a linear regression model  
38  
39 b. Length of stay: if appropriate the length of hospital stay will be compared between the  
40 strategies by using a linear regression.  
41  
42 c. Transfer: the proportion of patients with an unplanned transfer to the ICU will be compared  
43 between arms (logistic regression model)  
44  
45 d. Mortality and readmission: All-cause mortality during the 3-month follow-up will be  
46 investigated with Kaplan Meier's survival curves, and compared between the arms using a  
47 log-rank test stratified on sites. Readmissions during the 3-month follow-up will be  
48 investigated using survival models with competing risk. Death before readmission will be  
49 the competing event.  
50  
51

52 4) Cost outcomes: Mean cost per patient will be assessed and compared between arms using multiple  
53 linear regression models. Reweighted estimators will be used to account for censoring.  
54  
55

56  
57 All relevant proportions (sensitivity, specificity, predictive values...) will be reported with the exact 95%  
58 confidence intervals assess by Clopper-Pearson method. All regression models will be adjusted for  
59  
60

1  
2  
3 sites and tests for comparison of survival or cumulative incidence will be stratified on sites to account  
4 for the stratified randomisation. All statistical tests will two-sided with a level of 5%.

5  
6 Sensitivity analyses :

- 7  
8  
9 1) As a sensitivity analysis, the primary analysis and the secondary analyses 1a) and 1b) will be  
10 repeated, whereby only the level “high” on the Likert scale is regarded as positive diagnosis  
11 (clinician’s diagnoses and reference diagnoses).  
12  
13 2) As a sensitivity analysis, the secondary analysis 2a) will be repeated excluding exacerbation of  
14 COPD, where the need for antibiotic therapy is still debated.  
15  
16  
17

18 Interim and safety analyses

19  
20 There will be no comparative analysis for efficacy or futility. An initial safety analysis will be performed  
21 after 200 patients have reached the 1-month follow-up. The study’s data manager will ensure that the  
22 data will be exported with “scrambled” allocation labels and that study investigators do not have access  
23 to the data. The results will be transmitted to the principal investigators and the safety monitoring board.  
24 The latter will be free to lift the blind if deemed necessary, and will be asked to make the final decision  
25 on the continuation of the study without modification, or terminating the study.  
26  
27  
28

29 Sub-group analyses

30  
31 The primary analysis and the secondary analyses related to the assessment of diagnostic performances  
32 (secondary analyses 1) to 4)) will be conducted in sub-groups of patients: 1) patients aged less than 80  
33 years versus patients aged over 80 years, 2) patients with a positive PCR (i.e. detection of a virus,  
34 including SARS CoV-2) at the beginning of the study versus patients with a negative PCR.  
35  
36  
37

38 Additional analyses:

39  
40 The sensitivity of each diagnostic strategy will be assessed in patients with a viral pneumonia as  
41 determined by the panel of experts and in patients with a bacterial pneumonia or patients without a  
42 detected pathogen. A comparison will be conducted with Fisher’s exact test. This comparison will be  
43 exploratory. The same will be done for patients with aspiration pneumonia.  
44  
45  
46

47 Handling of missing data and drop-outs

48  
49 Some patients will be discharged from the ED, but they won’t be considered as dropout patients as the  
50 diagnosis of pneumonia will be made before the discharge, and follow-up will be done by phone. All  
51 available data from all included patients will be included in the intention-to-treat analysis whereas  
52 patients with missing data will be excluded from the complete case analysis. In addition, multiple  
53 imputation will be performed if more than 10% of data of the outcome are missing. R (R Foundation for  
54 Statistical Computing, Vienna, Austria) will be used for statistical analyses.  
55  
56  
57

58 **Data management**

1  
2  
3 Data will be collected by using electronic case record forms in REDCap® software, and will be securely  
4 stored for 10 years.  
5  
6  
7

## 8 **PATIENT AND PUBLIC INVOLVEMENT**

9  
10 No patients or public have been included in the study design but was presented at a patient-partner  
11 meeting.  
12  
13

## 14 **ETHICS AND DISSEMINATION**

15  
16 OCTOPLUS will be carried out in accordance to the research plan and the Declaration of Helsinki, the  
17 Swiss Law and Swiss regulatory authority's requirements as applicable.<sup>37 38</sup> The application has been  
18 approved by the lead committee, i.e. the Ethic Committee of Geneva (CEC, number 2019-01288).  
19

20  
21 Vulnerable participants will be included. Clinical studies in elderly patients are scarce, in part because  
22 informed consent is difficult to obtain due to acute confusion or permanent cognitive impairment in this  
23 group. If the patient is able to consent in the ER, he/she will be invited to participate to the study and will  
24 be asked to read and sign the consent. If not, a physician independent of the study will safeguard the  
25 patient's interests and possibly give consent for the patient to participate in the study and will sign the  
26 dedicated written confirmation according to Swiss law on Human research (HRA, Art. 7, 16, and 18, 42;  
27 ClinO, Art. 7 - 9). When the patient recovers his capacity to consent during hospitalization, he will sign  
28 the standard consent of the participant. Otherwise it will be signed by the legal representative (who can  
29 be a relative in Switzerland). If the latter finally deny consent, all data collected until then will be kept  
30 and used in the analysis as written in the letter of information and consent. Consents and written  
31 confirmation of the independent physician are provided in as supplementary files 2 to 4).  
32  
33  
34  
35  
36

37  
38 Data storage will be handled according to international standards. The CEC will receive annual safety  
39 and interim reports and be informed about study stop/end in agreement with local requirements. Risk-  
40 based monitoring will be performed by the Clinical Trial Unit on each site.  
41  
42

43 The results of the study will be disseminated through conference presentations in national and  
44 international conferences and peer-reviewed manuscripts published in open-access journals. Trial  
45 findings will be integrated into national and international guidelines. As described in the data  
46 management plan, data will be shared according to FAIR data principles and thus in a FAIR-compliant  
47 data repository.  
48  
49

## 50 **DISCUSSION AND IMPLICATIONS**

51  
52 To our knowledge, no randomized trial has ever compared the performance of CXR, CT scan and LUS  
53 in patients with suspected pneumonia. The OCTOPLUS trial will allow a direct comparison of CXR-,  
54 LDCT- and LUS-based strategies for the diagnosis of pneumonia in a randomized trial.  
55  
56

57 The results will have an important impact for emergency medicine, internal medicine and general  
58 practice, because the question of the superiority of LDCT over CXR in diagnosing pneumonia in the  
59  
60

1  
2  
3 elderly will be addressed. Confirmed superiority could profoundly affect recommendations for the  
4 diagnosis of pneumonia in elderly patients, and LDCT could become the preferred diagnostic option  
5 over CXR. This could also apply to the superiority of LUS over CXR, with the added benefit of being  
6 more readily available and non-irradiating compared with LDCT. Other strengths of the study will be the  
7 random blinding of two of the three imaging modalities to the patients and clinicians, and the LUS  
8 standardization among sonographers.  
9

10  
11  
12 We will use an adjudication expert committee for the reference diagnosis using a Delphi method to  
13 obtain consensus.<sup>39</sup> Experts will have access to all three imaging modalities obtained for all patients  
14 irrespective of randomization arm in order to minimize information bias. However, this might induce an  
15 incorporation bias as the tests under evaluation will be known when interpreting the reference  
16 standard.<sup>40</sup> This might be considered as a limitation of the study but such a methodology is  
17 recommended in the absence of a gold standard, which is the case in the diagnosis of pneumonia in  
18 elderly patients in whom it seems not ethical to perform a broncho-alveolar lavage. Another limitation is  
19 that the primary outcome (difference in accuracy) is not a clinical outcome but we have included clinical  
20 outcomes as secondary ones.  
21  
22  
23  
24  
25  
26  
27  
28  
29  
30  
31  
32  
33  
34  
35  
36  
37  
38  
39  
40  
41  
42  
43  
44  
45  
46  
47  
48  
49  
50  
51  
52  
53  
54  
55  
56  
57  
58  
59  
60

## Acknowledgments

We thank all members of OCTOPLUS study group, the ER and IT teams, the research nurses, the coordinators and monitors, and the Clinical Research Center of Hôpitaux Universitaires de Genève (HUG).

## Contributors

VP has the primary responsibility for the final content.

Study concept and design : VP, WEH, NG, JS, TS, AP, CC, EB.

Draft of manuscript and statistical analysis: VP, WEH, NG, TS, JS, CC.

Revision of manuscript: all authors read and approved the manuscript for final publication.

Complete membership of the OCTOPLUS study group:

The leader of the group is Virginie Prendki (sponsor-principal investigator).

Other members: Nicolas Garin, Christophe Combescure and in alphabetical order: Gianluca Argentieri, Christine Baumgartner, Tanja Birrenbach, Clémence Cuvelier, Christophe Fehlmann, Olivier Grosгурin, François Herrmann, Alessandro Jessula, Laurent Kaiser, Beat Lehmann, Antonio Leidi, Christophe Marti, Mihaela Martinvalet, Daniel Ott, Thibault Parent, Pierre-Alexandre Poletti, Jean-Luc Reny, Xavier Roux, Frédéric Rouyer, Thomas Ruder, Max Scheffler, Guillaume Soret, Catherine Vindret, Dina Zekry, Enrico Zucconi.

Sponsor: VP (HUG)

## Funding

This study is funded by the Swiss National Science Foundation (grant number 32003B\_197398) and by the Ligue Pulmonaire Genevoise (no grant number).

## Competing interests:

WEH has received research funding from the European Union, the Swiss National Science foundation, Zoll foundation, Dräger Medical Germany, Mundipharma Research UK, MDI International Australia, Roche Diagnostics Germany, all outside the submitted work.

WEH has provided paid consultancies to AO foundation Switzerland and MDI International Australia, all outside the submitted work.

WEH has received financial support for a congress he chaired from EBSCO Germany, Isabel Healthcare UK, Mundipharma Medical Switzerland, VisualDx USA, all outside the submitted work.

**Patient and public involvement:** Patients and/or the public were not involved in the design, or conduct, or reporting or dissemination plans of this research.

**Patient consent for publication:** Not required

**Ethics approval:** Ethical approval has been obtained by the Competent Ethics Committee (CER-GE 2019-01288).



## REFERENCES

1. OFSP. Vieillessement actif. [www.bfsadmin.ch/bfs/fr/home.html](http://www.bfsadmin.ch/bfs/fr/home.html) 2008
2. Ewig S, Klapdor B, Pletz MW, et al. Nursing-home-acquired pneumonia in Germany: an 8-year prospective multicentre study. *Thorax* 2012;67(2):132-8. doi: 10.1136/thoraxjnl-2011-200630 [published Online First: 2011/11/08]
3. Chami K, Gavazzi G, Carrat F, et al. Burden of infections among 44,869 elderly in nursing homes: a cross-sectional cluster nationwide survey. *The Journal of hospital infection* 2011;79(3):254-9. doi: 10.1016/j.jhin.2011.08.003 [published Online First: 2011/09/09]
4. Wroe PC, Finkelstein JA, Ray GT, et al. Aging population and future burden of pneumococcal pneumonia in the United States. *J Infect Dis* 2012;205(10):1589-92. doi: 10.1093/infdis/jis240 [published Online First: 2012/03/27]
5. Mandell LA, Wunderink RG, Anzueto A, et al. Infectious Diseases Society of America/American Thoracic Society consensus guidelines on the management of community-acquired pneumonia in adults. *Clinical infectious diseases : an official publication of the Infectious Diseases Society of America* 2007;44 Suppl 2:S27-72. doi: 10.1086/511159 [published Online First: 2007/02/06]
6. Woodhead M, Blasi F, Ewig S, et al. Guidelines for the management of adult lower respiratory tract infections--full version. *Clinical microbiology and infection : the official publication of the European Society of Clinical Microbiology and Infectious Diseases* 2011;17 Suppl 6:E1-59. doi: 10.1111/j.1469-0691.2011.03672.x [published Online First: 2011/11/02]
7. Aliberti S, Brambilla AM, Chalmers JD, et al. Phenotyping community-acquired pneumonia according to the presence of acute respiratory failure and severe sepsis. *Respiratory research* 2014;15:27. doi: 10.1186/1465-9921-15-27 [published Online First: 2014/03/07]
8. Black AD. Non-infectious mimics of community-acquired pneumonia. *Pneumonia (Nathan)* 2016;8:2. doi: 10.1186/s41479-016-0002-1 [published Online First: 2016/04/12]
9. Syrjala H, Broas M, Suramo I, et al. High-resolution computed tomography for the diagnosis of community-acquired pneumonia. *Clinical infectious diseases : an official publication of the Infectious Diseases Society of America* 1998;27(2):358-63. [published Online First: 1998/08/26]
10. Albaum MN, Hill LC, Murphy M, et al. Interobserver reliability of the chest radiograph in community-acquired pneumonia. PORT Investigators. *Chest* 1996;110(2):343-50. [published Online First: 1996/08/01]
11. Faverio P, Aliberti S, Bellelli G, et al. The management of community-acquired pneumonia in the elderly. *European journal of internal medicine* 2014;25(4):312-9. doi: 10.1016/j.ejim.2013.12.001 [published Online First: 2013/12/24]
12. Fernandez-Sabe N, Carratala J, Roson B, et al. Community-acquired pneumonia in very elderly patients: causative organisms, clinical characteristics, and outcomes. *Medicine* 2003;82(3):159-69. doi: 10.1097/01.md.0000076005.64510.87 [published Online First: 2003/06/07]
13. Haga T, Fukuoka M, Morita M, et al. Computed Tomography for the Diagnosis and Evaluation of the Severity of Community-acquired Pneumonia in the Elderly. *Internal medicine (Tokyo, Japan)* 2016;55(5):437-41. doi: 10.2169/internalmedicine.55.5556 [published Online First: 2016/03/05]
14. Loeb M, Carusone SC, Goeree R, et al. Effect of a clinical pathway to reduce hospitalizations in nursing home residents with pneumonia: a randomized controlled trial. *Jama* 2006;295(21):2503-10. doi: 10.1001/jama.295.21.2503 [published Online First: 2006/06/08]
15. Metlay JP, Schulz R, Li YH, et al. Influence of age on symptoms at presentation in patients with community-acquired pneumonia. *Archives of internal medicine* 1997;157(13):1453-9. [published Online First: 1997/07/14]
16. Sauter TC, Capaldo G, Hoffmann M, et al. Non-specific complaints at emergency department presentation result in unclear diagnoses and lengthened hospitalization: a prospective observational study. *Scandinavian Journal of Trauma, Resuscitation and Emergency Medicine* 2018;26(1):60. doi: 10.1186/s13049-018-0526-x
17. Hautz WE, Kämmer JE, Hautz SC, et al. Diagnostic error increases mortality and length of hospital stay in patients presenting through the emergency room. *Scandinavian Journal of Trauma, Resuscitation and Emergency Medicine* 2019;27(1):54. doi: 10.1186/s13049-019-0629-z
18. Mattsson B, Ertman D, Exadaktylos AK, et al. Now you see me: a pragmatic cohort study comparing first and final radiological diagnoses in the emergency department. *BMJ open* 2018;8(1):e020230. doi: 10.1136/bmjopen-2017-020230
19. Chandra A, Nicks B, Maniago E, et al. A multicenter analysis of the ED diagnosis of pneumonia. *The American journal of emergency medicine* 2010;28(8):862-5. doi: 10.1016/j.ajem.2009.04.014 [published Online First: 2010/10/05]

20. Kanwar M, Brar N, Khatib R, et al. Misdiagnosis of community-acquired pneumonia and inappropriate utilization of antibiotics: side effects of the 4-h antibiotic administration rule. *Chest* 2007;131(6):1865-9. doi: 10.1378/chest.07-0164 [published Online First: 2007/04/03]
21. Waterer GW. The Diagnosis of Community-acquired Pneumonia. Do We Need to Take a Big Step Backward? *American journal of respiratory and critical care medicine* 2015;192(8):912-3. doi: 10.1164/rccm.201507-1460ED [published Online First: 2015/10/16]
22. Claessens YE, Debray MP, Tubach F, et al. Early Chest Computed Tomography Scan to Assist Diagnosis and Guide Treatment Decision for Suspected Community-acquired Pneumonia. *American journal of respiratory and critical care medicine* 2015;192(8):974-82. doi: 10.1164/rccm.201501-0017OC [published Online First: 2015/07/15]
23. Prendki V, Scheffler M, Huttner B, et al. Low-dose computed tomography for the diagnosis of pneumonia in elderly patients: a prospective, interventional cohort study. *Eur Resp J* 2018;51(5) doi: 10.1183/13993003.02375-2017
24. Garin N, Marti C, Scheffler M, et al. Computed tomography scan contribution to the diagnosis of community-acquired pneumonia. *Curr Opin Pulm Med* 2019;25(3):242-48. doi: 10.1097/mcp.0000000000000567 [published Online First: 2019/02/08]
25. Soldati G, Smargiassi A, Inchingolo R, et al. Is there a role for lung ultrasound during the COVID-19 pandemic? *Journal of ultrasound in medicine : official journal of the American Institute of Ultrasound in Medicine* 2020 doi: 10.1002/jum.15284 [published Online First: 2020/03/22]
26. Llamas-Alvarez AM, Tenza-Lozano EM, Latour-Perez J. Accuracy of Lung Ultrasonography in the Diagnosis of Pneumonia in Adults: Systematic Review and Meta-Analysis. *Chest* 2017;151(2):374-82. doi: 10.1016/j.chest.2016.10.039 [published Online First: 2016/11/08]
27. Xia Y, Ying Y, Wang S, et al. Effectiveness of lung ultrasonography for diagnosis of pneumonia in adults: a systematic review and meta-analysis. *J Thorac Dis* 2016;8(10):2822-31. doi: 10.21037/jtd.2016.09.38 [published Online First: 2016/11/22]
28. Liu XL, Lian R, Tao YK, et al. Lung ultrasonography: an effective way to diagnose community-acquired pneumonia. *Emergency medicine journal : EMJ* 2015;32(6):433-8. doi: 10.1136/emered-2013-203039 [published Online First: 2014/08/22]
29. Nazerian P, Volpicelli G, Vanni S, et al. Accuracy of lung ultrasound for the diagnosis of consolidations when compared to chest computed tomography. *The American journal of emergency medicine* 2015;33(5):620-5. doi: 10.1016/j.ajem.2015.01.035 [published Online First: 2015/03/12]
30. Amatya Y, Rupp J, Russell FM, et al. Diagnostic use of lung ultrasound compared to chest radiograph for suspected pneumonia in a resource-limited setting. *Int J Emerg Med* 2018;11(1):8. doi: 10.1186/s12245-018-0170-2 [published Online First: 2018/03/13]
31. Staub LJ, Mazzali Biscaro RR, Kaszubowski E, et al. Lung Ultrasound for the Emergency Diagnosis of Pneumonia, Acute Heart Failure, and Exacerbations of Chronic Obstructive Pulmonary Disease/Asthma in Adults: A Systematic Review and Meta-analysis. *The Journal of emergency medicine* 2019;56(1):53-69. doi: 10.1016/j.jemermed.2018.09.009 [published Online First: 2018/10/14]
32. Ticinesi A, Lauretani F, Nouvenne A, et al. Lung ultrasound and chest x-ray for detecting pneumonia in an acute geriatric ward. *Medicine* 2016;95(27):e4153. doi: 10.1097/md.00000000000004153 [published Online First: 2016/07/12]
33. Ticinesi A, Scarlata S, Nouvenne A, et al. The Geriatric Patient: The Ideal One for Chest Ultrasonography? A Review From the Chest Ultrasound in the Elderly Study Group (GRETA) of the Italian Society of Gerontology and Geriatrics (SIGG). *Journal of the American Medical Directors Association* 2019 doi: 10.1016/j.jamda.2019.06.018 [published Online First: 2019/08/11]
34. Chan AW, Tetzlaff JM, Gøtzsche PC, et al. SPIRIT 2013 explanation and elaboration: guidance for protocols of clinical trials. *BMJ (Clinical research ed)* 2013;346:e7586. doi: 10.1136/bmj.e7586 [published Online First: 2013/01/11]
35. Larke FJ, Kruger RL, Cagnon CH, et al. Estimated radiation dose associated with low-dose chest CT of average-size participants in the National Lung Screening Trial. *AJR American journal of roentgenology* 2011;197(5):1165-9. doi: 10.2214/ajr.11.6533 [published Online First: 2011/10/25]
36. El Moussaoui R, Opmeer BC, Bossuyt PMM, et al. Development and validation of a short questionnaire in community acquired pneumonia. *Thorax* 2004;59(7):591-95. doi: 10.1136/thx.2003.015107
37. Declaration of Helsinki, version October, 2013. Available: <http://www.wma.net/en/30publications/10policies/b3/index.html>.

- 1  
2  
3 38. Humanforschungsgesetz, HFG Bundesgesetz über die Forschung am Menschen (Bundesgesetz  
4 über die Forschung am Menschen, HFG) vom 30. September 2011/ Loi fédérale relative la  
5 recherche sur l'être humain (loi relative la recherche sur l'être humain, LRH) du 30 septembre  
6 2011. Available: [https://www.bag.admin.ch/bag/fr/home/medizin-und-forschung/forschung-am-  
8 menschen.html](https://www.bag.admin.ch/bag/fr/home/medizin-und-forschung/forschung-am-<br/>7 menschen.html)  
9 39. Niederberger M, Spranger J. Delphi Technique in Health Sciences: A Map. *Frontiers in public health*  
10 2020;8:457-57. doi: 10.3389/fpubh.2020.00457  
11 40. Reitsma JB, Rutjes AW, Khan KS, et al. A review of solutions for diagnostic accuracy studies with  
12 an imperfect or missing reference standard. *Journal of clinical epidemiology* 2009;62(8):797-  
13 806. doi: 10.1016/j.jclinepi.2009.02.005 [published Online First: 2009/05/19]  
14  
15  
16  
17  
18  
19  
20  
21  
22  
23  
24  
25  
26  
27  
28  
29  
30  
31  
32  
33  
34  
35  
36  
37  
38  
39  
40  
41  
42  
43  
44  
45  
46  
47  
48  
49  
50  
51  
52  
53  
54  
55  
56  
57  
58  
59  
60

For peer review only

1  
2  
3 **Tables and figures**

4 **Table 1. Eligibility criteria**

5  
6 **Table 2. Causes of unblinding in emergency**

7 **Table 3. Secondary outcomes**

8  
9 **Table 4. Timeline of patient enrolment/allocation, interventions, and assessments**

10 **Figure 1. Study design**

11  
12  
13 **Supplementary files**

14 **Supplementary file 1. Calculation of the sample size**

15  
16 **Supplementary file 2. Consent form for the patient**

17 **Supplementary file 3. Consent form for the representative**

18  
19 **Supplementary file 4. Written confirmation of the independent physician**

1  
2  
3  
4  
5  
6  
7  
8  
9  
10  
11  
12  
13  
14  
15  
16  
17  
18  
19  
20  
21  
22  
23  
24  
25  
26  
27  
28  
29  
30  
31  
32  
33  
34  
35  
36  
37  
38  
39  
40  
41  
42  
43  
44  
45  
46  
47  
48  
49  
50  
51  
52  
53  
54  
55  
56  
57  
58  
59  
60

Figure 1.

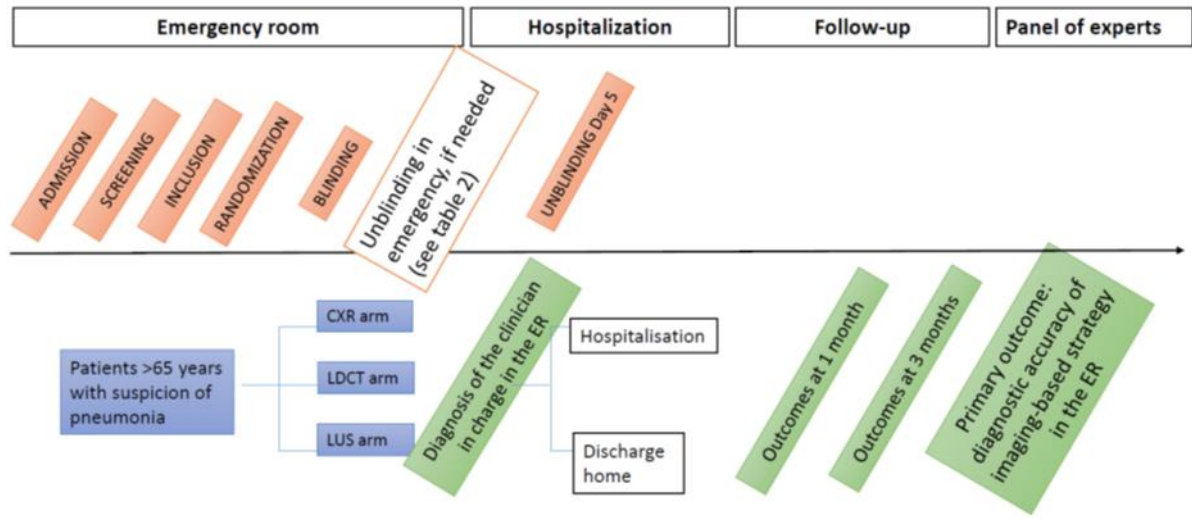

CXR = chest x-ray, LDCT = low-dose CT scan, LUS = lung ultrasonography

Peer review only

**Table 1 bis. Calculation of the sample size**

Findings of the PneumO-LD-CT cohort (unpublished results). For each of the 200 participants, the probability of pneumonia was assessed by a clinician before and after LDCT. A committee of experts adjudicated the diagnosis of pneumonia.

| <i>Clinician's estimates of the probability of pneumonia based on CXR (before LDCT)</i> | <i>Clinician's estimates of the probability of pneumonia after LDCT</i> |                    |            |
|-----------------------------------------------------------------------------------------|-------------------------------------------------------------------------|--------------------|------------|
| <b>Patients with pneumonia according to an adjudication committee (n=131)</b>           |                                                                         |                    |            |
|                                                                                         | Low                                                                     | Intermediate/ high | TOTAL      |
| Low                                                                                     | <b>1</b>                                                                | <b>6</b>           | <b>7</b>   |
| Intermediate/ high                                                                      | <b>10</b>                                                               | <b>116</b>         | <b>126</b> |
| TOTAL                                                                                   | <b>11</b>                                                               | <b>122</b>         | <b>133</b> |
| <b>Patients without pneumonia according to an adjudication committee (n=67)</b>         |                                                                         |                    |            |
|                                                                                         | Low                                                                     | Intermediate/ high | TOTAL      |
| Low                                                                                     | <b>9</b>                                                                | <b>1</b>           | <b>10</b>  |
| Intermediate/ high                                                                      | <b>37</b>                                                               | <b>20</b>          | <b>57</b>  |
| TOTAL                                                                                   | <b>46</b>                                                               | <b>21</b>          | <b>67</b>  |
| <b>Total patients (n=200)</b>                                                           |                                                                         |                    |            |

In this adjudication, the panel of experts had access to the results of LDCT to rate their probability of pneumonia, on the contrary of previous published results<sup>23</sup>.

The accuracy of clinician's diagnosis before LDCT was  $(126+10)/(133+67) = 0.68$ .

The accuracy of clinician's diagnosis after LDCT was  $(122+46)/(133+67) = 0.84$ .

Demande de participation à un projet de recherche médical :

---

## **OCTOPLUS : comparaison du scanner thoracique à la radiographie et l'ultrasonographie dans le diagnostic de la pneumonie du sujet de plus de 65 ans**

---

Madame, Monsieur,

Vous venez d'être hospitalisé(e) pour une suspicion de pneumonie et nous vous proposons de participer au projet de recherche que nous décrivons dans cette feuille d'information.

Deux situations sont possibles :

- Vous êtes actuellement aux urgences et aucune intervention liée à l'étude n'a encore été effectuée.
- Lors de votre passage aux urgences, vous ne possédiez pas votre capacité de discernement et un·e médecin indépendant·e de l'étude a déjà autorisé que des interventions en lien avec l'étude soient effectuées (*les passages en italique vous concernent*).

Votre participation est entièrement libre. Toutes les données collectées dans le cadre de ce projet sont soumises à des règles strictes en matière de protection des données.

Le projet de recherche est mené par les Hôpitaux Universitaires de Genève. Nous vous en communiquerons les résultats si vous le souhaitez.

Lors d'un entretien, nous vous présenterons les éléments essentiels et répondrons à vos questions. Pour vous proposer d'ores et déjà un aperçu du projet, voici les points clés à retenir. Vous trouverez à la suite des informations complémentaires plus détaillées.

### **Pourquoi menons-nous ce projet de recherche ?**

- Cette étude étudie la meilleure façon de diagnostiquer une pneumonie chez des patient·e·s de plus de 65 ans. Trois techniques d'imagerie différentes du thorax sont comparées : les rayons X, le scanner à faible irradiation (CT) et l'échographie (US).
- Cette étude est réalisée chez 500 patient·e·s chez qui une pneumonie est suspectée.
- Même si tous les participant·e·s inclus·e·s dans l'étude ont les trois examens d'imagerie mentionnés ci-dessus, elles/ils sont réparti·e·s au hasard en trois groupes, le résultat initial de l'un des trois examens étant mis à la disposition de la /du médecin compétent·e.

### **Que se passe-t-il pour moi en cas de participation ?**

- La durée de l'étude est de 3 mois ou de 1 an si vous participez à **GEROBIOTA**.
- Un·e membre du personnel de l'étude vous contactera à 1 mois, 3 mois et un an (si inclusion dans **GEROBIOTA**) par téléphone pour vous poser des questions sur votre état de santé (environ 5 min par appel).
- Dans le cadre de **GEROBIOTA**, vous pourrez bénéficier d'un examen dentaire complet et d'une évaluation médicale de votre âge.

## Quels sont les bénéfices et les risques liés à la participation au projet ?

### ▪ **Bénéfices pour les participants**

La participation à ce projet de recherche ne vous apportera aucun bénéfice direct. Par sa participation, vous contribuez à aider les futur.e.s patient.e.s.

### ▪ **Risques et contraintes**

Une radiographie est l'examen radiologique le plus fréquent et présente une faible exposition aux rayonnements.

Pour le CT thoracique, l'exposition aux rayonnements est également faible (en dessous de l'exposition de la population suisse à la radioactivité toute l'année) et il n'y a pas d'injection de produit de contraste.

L'échographie pulmonaire ne produit pas de rayonnement ionisant.

On ne sait toujours pas quelle est la meilleure stratégie diagnostique. La présente étude fournira des réponses à ce sujet.

Les risques associés à l'étude sont minimes et les résultats escomptés peuvent être très bénéfiques à long terme pour les patient.e.s atteints d'une pneumonie.

En apposant votre signature à la fin du document, vous certifiez en avoir compris tout le contenu et accorder librement votre consentement pour votre participation au projet.



## Information détaillée

### 1. Objectif du projet et sélection des participant-e-s

Dans cette feuille d'information, notre projet de recherche est aussi simplement désigné par le terme *étude*. Si vous accordez votre consentement pour votre participation vous serez un-e *participant-e à l'étude*.

Nous faisons une étude pour comparer 3 méthodes diagnostiques dans la pneumonie de la personne de plus de 65 ans : la radiographie thoracique, le scanner thoracique à faible irradiation, qui permet l'acquisition d'images plus fines, et l'échographie ou ultrasonographie (US), qui n'engendre pas d'irradiation. La radiographie thoracique est l'examen effectué en routine dans le diagnostic de la pneumonie. Mais elle peut être difficile à interpréter, notamment chez des personnes âgées. D'autres maladies peuvent parfois mimer la pneumonie (bronchite, insuffisance cardiaque...). Or il est essentiel que le diagnostic soit réalisé le plus précisément possible dès les premières heures de votre l'arrivée à l'hôpital afin de vous administrer le traitement adéquat. Un diagnostic plus précis permettrait d'éviter la prescription assez systématique d'antibiotiques. Cette étude pourra montrer si le scanner permet d'améliorer le diagnostic de la pneumonie et de mieux ajuster le traitement par antibiotique en comparaison à la radiographie et à l'échographie.

Certains facteurs de risque de pneumonie ont été identifiés (difficulté à avaler par exemple) mais d'autres sont moins connus comme un mauvais état dentaire. Si vous donnez votre accord, vous pourrez participer à l'étude **GEROBIOTA** qui porte sur le lien entre pneumonie et état de santé dentaire et présence de bactéries dans la bouche et les voies respiratoires (microbiote).

L'étude **Pneumoscope** permettra d'évaluer les performances d'un stéthoscope couplé à de l'intelligence artificielle.

Nous vous sollicitons car la participation à **OCTOPLUS** est ouverte à toutes les personnes de plus de 65 ans qui ont une suspicion de pneumonie. Elle est fermée aux personnes qui ont eu une pneumonie les trois derniers mois, qui ont déjà eu un scanner thoracique ou qui doivent en avoir un avec une injection, et dont la pneumonie est grave et nécessite un transfert aux soins intensifs.

*Il se peut qu'un-e médecin indépendant-e de l'étude ait déjà été consulté-e pour donner son avis quant à l'absence de risque pour votre participation à cette étude, car vous étiez au moment de votre séjour aux urgences en incapacité de donner votre consentement. Vous pouvez maintenant décidez si oui ou non vous souhaitez continuer à participer à l'étude.*

Il sera proposé aux patient-e-s de Genève et Berne de participer à l'étude **GEROBIOTA** et **Pneumoscope**.

### 2. Informations générales sur l'étude OCTOPLUS

Il s'agit d'une étude nationale suisse qui porte sur 500 patient-e s consultant aux urgences pour pneumonie. Chacun-e aura une radiographie, un scanner et un US des poumons. Les participant-e.s seront réparti-e.s de façon aléatoire dans 3 groupes en fonction de l'imagerie rendue accessible à la/au médecin. Dans le 1<sup>er</sup> groupe, la/le médecin aura uniquement accès au résultat de la radiographie, dans le 2<sup>ème</sup>, au scanner et dans le 3<sup>ème</sup>, à l'échographie.

L'étude durera globalement 2 ans et votre suivi se fera pendant 3 mois, voire un an si vous participez à l'étude **GERIOBOTA**.

**GEROBIOTA** : il s'agit de mieux connaître les facteurs de risque de la pneumonie chez les plus de 65 ans. Si vous participez vous pourrez bénéficier d'une évaluation gériatrique et d'un examen bucco-dentaire lors de votre hospitalisation et de faire partie d'une **biobanque** (collection et conservation d'échantillons biologiques à des fins de recherche).

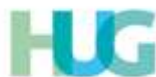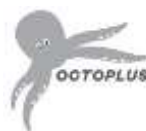

**Pneumoscope** : il s'agit de voir si un stéthoscope couplé à de l'intelligence artificielle permet d'améliorer le diagnostic de pneumonie.

Cette étude est réalisée dans le respect des prescriptions de la législation suisse. Nous suivons en outre l'ensemble des directives reconnues au niveau international. La commission d'éthique compétente a examiné et autorisé l'étude.

Vous trouverez aussi un descriptif de l'étude sur le site Internet de l'Office fédéral de la santé publique : [www.kofam.ch](http://www.kofam.ch) (SNCTP000003808).

### 3. Déroulement pour les participant.e.s

Les 3 imageries seront réalisées aux urgences (*ou ont déjà été réalisées, si vous ne possédiez pas votre capacité de décider aux urgences et qu'un.e médecin indépendant.e a donné son autorisation*) mais seule l'une d'entre elles sera immédiatement accessible à la/au médecin des urgences. Finalement, au 5<sup>ème</sup> jour, les résultats des deux autres imageries qui étaient masqués seront de nouveau rendus disponibles.

**PNEUMOSCOPE** : un stéthoscope enregistrant les bruits pulmonaires sera utilisé pour vous ausculter aux urgences.

**GEROBIOTA** : un examen dentaire et un examen gériatrique (durée de 30 à 45 minutes chacun) seront réalisés.

Un personnel de l'étude prendra de vos nouvelles par téléphone à 1 et 3 mois, et à un an si vous avez accepté de participer à **GEROBIOTA**. Ces entretiens téléphoniques dureront moins de 5 minutes chacun.

Si vous donnez votre accord pour la **biobanque**, un prélèvement de salive et sang sera réalisé à l'entrée et à la sortie de l'hôpital (pas plus de 30ml au total), avec congélation de matériel respiratoire restant (crachat, aspiration trachéale ou lavage broncho-alvéolaire le cas échéant, frottis nasopharyngé).

Vous pouvez à tout moment vous retirer de l'étude si vous le souhaitez. Les données médicales et le matériel biologique (échantillons de sang, tissus, etc.) recueillis jusque-là seront tout de même analysés, ceci afin de ne pas compromettre la valeur de l'étude dans son ensemble. Il est impossible de rendre vos données et votre matériel biologique anonymes, c.-à-d. que les données et le matériel biologique resteront codés. Vous devez donc être d'accord avec cela avant de donner votre consentement.

### 4. Bénéfices pour les participant.e.s

Votre participation à cette étude ne vous apportera aucun bénéfice. Mais les résultats de l'étude pourraient se révéler importants par la suite pour les personnes touchées par une pneumonie.

### 5. Caractère facultatif de la participation et obligations

La participation à l'étude est entièrement libre. Si vous ne souhaitez pas participer ou si vous, revenez ultérieurement sur votre décision à ce sujet, vous n'aurez pas à vous justifier. Cette décision n'aura pas de répercussions défavorables sur la suite de votre prise en charge médicale. Si vous décidez de ne pas donner votre accord, vous bénéficierez d'une ou plusieurs des imageries citées ci-dessus pour faire le diagnostic selon la demande du médecin vous prenant en charge. Vous pouvez à tout moment poser toutes les questions nécessaires au sujet de l'étude. Veuillez-vous adresser pour ce faire à la Dre Prendki pour le site des 3-Chêne ou au Dr Stirnemann pour le site de Cluse-Roseraie.



La participation à l'étude implique les obligations suivantes :

Vous êtes tenu·e de suivre les instructions et de remplir les exigences prévues par le protocole de recherche : réalisation de la radiographie, du scanner et de l'échographie aux urgences.

La/le médecin-investigat·rice·eur doit être informé(e) de l'évolution de la maladie et il convient de lui signaler tout nouveau symptôme, tout nouveau trouble et tout changement de votre état.

## 6. Risques et contraintes pour les participant.e.s

La radiographie est la technique la plus couramment utilisée et est faiblement irradiante. Le scanner thoracique est à faible irradiation (moindre que l'irradiation annuelle en Suisse) et ne comprend pas d'injection. L'échographie n'est pas irradiante et est réalisée par les médecins des urgences. Les risques inhérents au projet sont minimaux et les résultats attendus pourraient apporter un bénéfice à long terme aux personnes ayant une pneumonie.

### Tableau récapitulatif des contraintes selon chaque étude

| OCTOPLUS                                                                 | GEROBIOTA                                                                                                            | PNEUMOSCOPE                                       |
|--------------------------------------------------------------------------|----------------------------------------------------------------------------------------------------------------------|---------------------------------------------------|
| Réalisation de la radiographie, scanner et de l'échographie aux urgences | Aux urgences :<br>prélèvement de sang (30 ml), salive, matériel respiratoire réalisé en routine ( <b>biobanque</b> ) | Enregistrement de bruits pulmonaires aux urgences |
| Suivi par personnel de l'étude tous les jours pendant l'hospitalisation  | Lors de l'hospitalisation :<br>Examen bucco-dentaire (30-45 min)<br>Evaluation gériatrique (30 à 45 min)             |                                                   |
| Appel téléphonique à 1 et 3 mois (5 min)                                 | Avant la sortie : salive et sang ( <b>biobanque</b> )                                                                |                                                   |
|                                                                          | Appel téléphonique à 1 an (5 min)                                                                                    |                                                   |

## 7. Alternatives

La participation à l'étude présente des bénéfices et des risques. Si vous décidez de ne pas donner votre accord, vous bénéficierez d'une ou plusieurs des imageries citées ci-dessus pour faire le diagnostic selon la demande du médecin le prenant en charge. La/le médecin-investigat·rice·eur vous conseillera à ce sujet lors de l'entretien.

## 8. Résultats

L'étude permet d'obtenir différents résultats :

- des résultats individuels qui vous concernent directement,
- des résultats individuels découverts par hasard (ce qu'on appelle les découvertes fortuites),
- les résultats définitifs objectifs de l'étude dans son ensemble.

a) Au cours de l'étude, la/le médecin-investigat·rice·eur vous avisera de toute nouvelle découverte importante vous concernant. Vous serez informé·e oralement et par écrit; vous pourrez par la suite à nouveau décider si vous souhaitez poursuivre votre participation à l'étude.

b). Les découvertes fortuites constituent des « résultats concomitants », à savoir des résultats qui n'ont pas été explicitement recherchés, mais qui ont été obtenus par hasard. Il peut s'agir p. ex. de résultats d'analyses génétiques ou de procédés d'imagerie (nodules pulmonaires).

Vous serez informé·e des découvertes fortuites si elles ont une incidence sur votre santé. Cela signifie que ces découvertes sont communiquées si l'on constate par hasard une pathologie qui

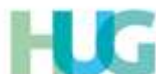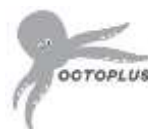

n'était pas encore connue jusqu'alors ou que l'on peut empêcher l'apparition d'une maladie par des mesures de prévention.

## **9. Confidentialité des données et des échantillons**

### **9.1. Traitement et codage des données**

Dans le cadre de cette étude, des données relatives à votre santé sont recueillies et traitées, en partie de manière automatisée. Ces informations sont codées au moment du relevé. Le codage signifie que toutes les données permettant de vous identifier (nom, date de naissance, etc.) sont effacées et remplacées par un code. Il n'est pas possible de relier les données à votre identité sans le code, qui reste en permanence au sein de l'hôpital. Seul un nombre limité de personnes peut consulter vos données sous une forme non codée, et ce, exclusivement pour pouvoir accomplir les tâches nécessaires au déroulement de l'étude. Ces personnes sont tenues au secret professionnel. Vous avez le droit de consulter vos données.

### **9.2. Protection des données et des échantillons**

Toutes les directives relatives à la protection des données sont rigoureusement respectées. Il est possible que les données doivent être transmises sous forme codée, par exemple pour une publication, et qu'elles puissent être mises à la disposition d'autres chercheurs. Lorsque des données relatives à la santé ou des échantillons biologiques sont conservés sur place, ils constituent une banque de données ou une biobanque à des fins de recherche. Il se peut que ces données et ces échantillons soient envoyés sous forme codée dans le cadre de cette étude à une autre banque de données/biobanque. Le promoteur doit s'assurer que le pays de destination garantit une protection des données équivalente à celle garantie en Suisse.

La partie du matériel biologique qui a été mise à disposition dans le cadre de la participation à l'étude par l'Institut de pathologie n'est en règle générale plus disponible à des fins diagnostiques.

Il se peut que la/le médecin chargé-e de votre suivi soit contacté-e pour des renseignements sur votre état de santé.

### **9.3. Protection des données en cas de réutilisation**

Vos données et vos échantillons pourraient ultérieurement se révéler importants pour répondre à d'autres questionnements et/ou être envoyés à une autre banque de données/biobanque située en Suisse ou à l'étranger pour être aussi exploités dans d'autres projets de recherche (réutilisation). Cette banque de données/biobanque doit toutefois obéir aux mêmes normes et exigences que la banque de données/biobanque de la présente étude.

Pour cette réutilisation, nous vous prions de signer une déclaration de consentement séparée à la fin de cette feuille d'information. Ce deuxième consentement est indépendant de votre participation à l'étude.

### **9.4. Protection des données en cas d'analyses génétiques**

Dès lors que l'on procède à un relevé, un enregistrement ou une transmission de données issues de vos échantillons dans le cadre de la recherche génétique, il existe des risques liés à la confidentialité (p. ex., la possibilité d'identifier la/le participant(e)), en particulier concernant les informations sur votre matériel génétique. Ces risques ne peuvent pas être totalement exclus et augmentent avec la quantité de données pouvant être appariées, notamment si vous avez publié ou publierez des données génétiques sur Internet (p. ex. à des fins de recherche généalogique). Les informations relatives à votre matériel génétique peuvent également être importantes pour les membres de votre famille. Par ailleurs, les résultats d'analyses génétiques doivent être communiqués, sous certaines conditions, avant la conclusion d'une assurance-vie. Le promoteur prend toutes les mesures nécessaires pour réduire le plus possible les risques liés à votre confidentialité.

### **9.5. Droit de consultation dans le cadre d'inspections**

L'étude peut faire l'objet d'inspections. Celles-ci peuvent être effectuées par la commission d'éthique compétente, par l'autorité suisse de contrôle et d'autorisation des produits thérapeutiques

Hôpitaux  
Universitaires  
Genève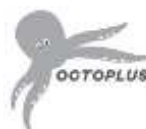

Swissmedic ou par le promoteur qui a initié l'étude. La/le médecin-investigat·rice·eur doit alors communiquer vos données pour les besoins de ces inspections. Toutes les personnes impliquées sont tenues au plus strict secret professionnel.

## 10. Retrait du projet

Vous pouvez à tout moment vous retirer de l'étude et mettre fin à votre participation si vous le souhaitez. Cependant, les données médicales et le matériel biologique recueillis jusque-là pourront encore être analysés sous forme codée.

En cas de retrait, vos données et vos échantillons continuent de figurer sous forme codée dans les documents de l'étude, en premier lieu pour assurer la sécurité médicale. Vous devez vérifier si vous êtes d'accord avec cela avant de donner votre consentement.

## 11. Dédommagement

Si vous participez à cette étude, vous ne recevrez aucune compensation. Seule l' sera facturée, et la participation à l'étude n'entraînera aucun frais supplémentaire ni pour vous ni pour votre assurance-maladie.

## 12. Responsabilité

Les Hôpitaux Universitaires de Genève qui ont initié l'étude et sont chargés de sa réalisation sont responsables des dommages que vous pourriez subir en relation avec les activités de recherche. Les conditions et la procédure sont fixées par la loi. Bien que ces recherches ne présentent pas de risque prévisible, l'institution (le promoteur) est responsable, en vertu des dispositions légales, de tout dommage pouvant survenir dans le cadre de l'étude.

Si vous subissiez un dommage du fait de votre participation à l'étude, il vous faudrait vous adresser à la/au médecin-investigat·rice·eur.

## 13. Financement

L'étude est majoritairement financée par le Fond National Suisse et la Ligue Pulmonaire Genevoise.

Vous pouvez à tout moment poser des questions au sujet de l'étude. En cas de doutes, de craintes ou d'urgence pendant ou après l'étude, vous pouvez vous adresser à l'un des interlocuteurs suivants :

- Dre Virginie Prendki, médecin adjoint agrégée, Hôpital Trois-Chêne, HUG, Chemin du Pont-Bochet 3, 1226 Thônex (tel : +4179 55 38308).
- Dr Jérôme Stirnemann, Hôpital Cluse-Roseraie, HUG, Rue Gabrielle-Perret-Gentil 4, 1205 Genève (+4179 553 44 08)

## 14. Glossaire (termes nécessitant une explication)

### ▪ Promoteur

Le promoteur est une personne ou une institution ayant son siège ou une représentation en Suisse qui prend l'initiative d'une étude, c.-à-d. qui porte la responsabilité de son lancement, de sa gestion et de son financement dans ce pays.

## Déclaration de consentement

### Déclaration de consentement écrite pour la participation à une étude clinique

Veillez lire attentivement ce formulaire. N'hésitez pas à poser des questions lorsque vous ne comprenez pas quelque chose ou que vous souhaitez avoir des précisions. Votre consentement écrit est nécessaire pour votre participation.

|                                                                                                           |                                                                                                                                                           |
|-----------------------------------------------------------------------------------------------------------|-----------------------------------------------------------------------------------------------------------------------------------------------------------|
| <b>Numéro BASEC du projet de recherche (après soumission à la commission d'éthique compétente) :</b>      | 2019-01288                                                                                                                                                |
| <b>Titre (scientifique et usuel) :</b>                                                                    | <b>OCTOPLUS : comparaison du scanner thoracique à la radiographie et l'ultrasonographie dans le diagnostic de la pneumonie du sujet de plus de 65 ans</b> |
| <b>Institution responsable (promoteur et adresse complète) :</b>                                          | <b>Hôpitaux Universitaires de Genève<br/>Rue Gabrielle-Perret-Gentil 4<br/>1205 Genève (Suisse)</b>                                                       |
| <b>Lieu de réalisation :</b>                                                                              | <b>Hôpitaux Universitaires de Genève</b>                                                                                                                  |
| <b>Médecin-investigat-ric-eur responsable sur le site :</b><br>Nom et prénom en caractères d'imprimerie : | <b>Hôpital des 3-Chêne : Dre Virginie Prendki<br/>Hôpital de Cluse-Roseraie : Dr. Jérôme Stirnemann</b>                                                   |
| <b>Participant-e :</b><br>Nom et prénom en caractères d'imprimerie :<br>Date de naissance :               |                                                                                                                                                           |

- Je déclare avoir été informé-e, par l'investigat-ric-eur soussigné-e, oralement et par écrit, des objectifs et du déroulement de l'étude mettant en œuvre ainsi que des avantages et des inconvénients possibles et des risques éventuels.
- Je prends part à cette étude de façon volontaire et j'accepte le contenu de la feuille d'information qui m'a été remise. J'ai eu suffisamment de temps pour prendre ma décision.
- J'ai reçu les réponses aux questions que j'ai posées en relation avec ma participation à cette étude. Je conserve la feuille d'information et reçois une copie de ma déclaration de consentement écrite.
- J'ai été informé des alternatives thérapeutiques au projet.
- J'accepte que ma/mon médecin traitant(e) soit informé-e de ma participation à l'étude.
- En cas de traitement ultérieur en dehors du lieu de réalisation de cette étude, j'autorise la/le ou les médecins à fournir à la/au médecin-investigat-ric-eur mes données post-traitement pertinentes pour l'étude.
- J'accepte que les spécialistes compétents du promoteur de ce projet, de la commission d'éthique compétente et de l'autorité suisse de contrôle et d'autorisation des produits thérapeutiques Swissmedic puissent consulter mes données non codées afin de procéder à des contrôles et

des inspections, à condition toutefois que la confidentialité de ces données soit strictement assurée.

- Je serai informé·e des résultats ou de toute découverte fortuite ayant une incidence directe sur ma santé. Si je ne souhaite pas obtenir ces informations, j'en avise la/le médecin-investigat·rice·eur.
- Je sais que mes données personnelles, mes données de santé (et mes échantillons) peuvent être transmis(es) à des fins de recherche dans le cadre de cette étude et uniquement sous une forme codée aussi à l'étranger. Le promoteur assure une protection des données conforme aux normes et exigences suisses.
- Je peux, à tout moment et sans avoir à me justifier, révoquer mon consentement à participer à l'étude, sans que cette décision n'ait de répercussions défavorables sur la suite de ma prise en charge. Les données et le matériel biologique qui ont été recueillis jusque-là seront cependant analysés dans le cadre de l'étude.
- Je suis informé·e que l'assurance-responsabilité civile de l'hôpital couvre les dommages éventuels imputables au projet.
- Je suis conscient·e que les obligations mentionnées dans la feuille d'information destinée aux participant·e·s doivent être respectées pendant toute la durée de l'étude. La/le médecin-investigat·rice·eur peut m'exclure à tout moment de l'étude dans l'intérêt de ma santé.

|                     |                                  |
|---------------------|----------------------------------|
| Lieu, date et heure | Signature de la/du participant·e |
|---------------------|----------------------------------|

Je donne mon accord pour OCTOPLUS :  Oui  Non  
 Je donne mon accord pour GEROBIOTA :  Oui  Non  
 Je donne mon accord pour la biobanque :  Oui  Non  
 Je donne mon accord pour Pneumoscope :  Oui  Non

**Attestation de de la personne investigatrice :** Par la présente, j'atteste avoir expliqué à la/au participant·e la nature, l'importance et la portée de l'étude. Je déclare satisfaire à toutes les obligations en relation avec cette étude conformément au droit suisse en vigueur. Si je devais prendre connaissance, à quelque moment que ce soit durant la réalisation de l'étude, d'éléments susceptibles d'influer sur le consentement de la/du participant·e à prendre part au projet, je m'engage à l'en informer immédiatement.

|                     |                                                                          |
|---------------------|--------------------------------------------------------------------------|
| Lieu, date et heure | Nom et prénom de la personne investigatrice en caractères d'imprimerie : |
|---------------------|--------------------------------------------------------------------------|

Signature de la personne investigatrice :



Hôpitaux  
Universitaires  
Genève



## Déclaration de consentement écrite pour la réutilisation de données (génétique) et d'échantillons biologiques de CETTE étude sous une forme codée.

|                                                                                                      |                                                                                                                                                           |
|------------------------------------------------------------------------------------------------------|-----------------------------------------------------------------------------------------------------------------------------------------------------------|
| <b>Numéro BASEC du projet de recherche (après soumission à la commission d'éthique compétente) :</b> | <b>2019-01288</b>                                                                                                                                         |
| <b>Titre (scientifique et usuel) :</b>                                                               | <b>OCTOPLUS : comparaison du scanner thoracique à la radiographie et l'ultrasonographie dans le diagnostic de la pneumonie du sujet de plus de 65 ans</b> |
| <b>Participant-e :</b><br>Nom et prénom en caractères d'imprimerie :<br>Date de naissance :          |                                                                                                                                                           |

- J'accepte que mes données (génétiques) et mon matériel biologique obtenus dans le cadre de cette étude puissent être réutilisés à des fins de recherche médicale sous forme codée. Cela signifie que le matériel biologique sera conservé dans une biobanque et ultérieurement exploité pour une durée indéfinie dans le cadre de futurs projets de recherche.
- Je sais que mon matériel biologique est conservé sous forme codée et que la liste d'identification est gardée dans un lieu sûr. Les données et le matériel biologique peuvent être envoyés à des fins d'analyse à une autre banque de données/biobanque située en Suisse ou à l'étranger, à condition qu'elle obéisse à des normes et exigences au moins équivalentes aux normes et exigences suisses. Toutes les dispositions légales relatives à la protection des données sont respectées.
- Je donne mon accord de façon volontaire et je peux à tout moment revenir sur ma décision. Si je reviens sur ma décision, mes données restent codées. Je dois simplement en informer la médecin-investigatrice / le médecin-investigateur. Je n'ai pas à justifier ma décision.
- Généralement, les données et le matériel biologique sont exploités de manière globale et les résultats sont publiés de manière synthétique. Il se peut que je sois contacté-e si l'analyse des données révèle une découverte pertinente pour ma santé. Si je ne souhaite pas en être informé-e, il m'incombe d'en aviser la médecin-investigatrice / le médecin-investigateur.
- Je renonce à tout droit d'exploitation commerciale sur le matériel biologique qui m'a été prélevé et sur mes données.

|                       |                                  |
|-----------------------|----------------------------------|
| Lieu, date et heure : | Signature de la/du participant-e |
|-----------------------|----------------------------------|

**Attestation de la personne investigatrice :** Par la présente, j'atteste avoir expliqué à la/au participant-e la nature, l'importance et la portée de la réutilisation des échantillons biologiques et/ou des données génétiques.

|                       |                                                                                                                           |
|-----------------------|---------------------------------------------------------------------------------------------------------------------------|
| Lieu, date et heure : | Nom et prénom de la personne investigatrice en caractères d'imprimerie :<br><br>Signature de la personne investigatrice : |
|-----------------------|---------------------------------------------------------------------------------------------------------------------------|



Demande de participation à un projet de recherche médical :

---

## **OCTOPLUS : comparaison du scanner thoracique à la radiographie et l'ultrasonographie dans le diagnostic de la pneumonie du sujet de plus de 65 ans**

---

Madame, Monsieur,

La/le patient·e a été intégré·e à un projet de recherche en situation d'urgence. Selon toute probabilité, il/elle restera durablement incapable de discernement et, par-là, de communiquer sa volonté. Dans la mesure où vous la/le représentez en tant que proche ou en tant que représentant·e légal·e nous vous faisons parvenir le présent document pour vous informer de notre étude. De plus, nous vous demandons de nous accorder, avec effet rétroactif et en votre qualité de représentant·e, votre consentement pour la participation au projet.

La participation est entièrement libre. Toutes les données collectées dans le cadre de ce projet sont soumises à des règles strictes en matière de protection des données.

Le projet de recherche est mené par les Hôpitaux Universitaires de Genève.

Lors d'un entretien, nous vous présenterons les éléments essentiels et répondrons à vos questions. Pour vous proposer d'ores et déjà un aperçu du projet, voici les points clés à retenir. Vous trouverez à la suite des informations complémentaires plus détaillées.

### **Pourquoi menons-nous ce projet de recherche ?**

- Cette étude étudie la meilleure façon de diagnostiquer une pneumonie chez des patient·e·s de plus de 65 ans. Trois techniques d'imagerie différentes du thorax sont comparées : les rayons X, le scanner à faible irradiation (CT) et l'échographie (US).
- Cette étude est réalisée chez 500 patient·e·s chez qui une pneumonie est suspectée.
- Même si tous les participant·e·s inclus·e·s dans l'étude ont les trois examens d'imagerie mentionnés ci-dessus, elles/ils sont réparti·e·s au hasard en trois groupes, le résultat initial de l'un des trois examens étant mis à la disposition de la /du médecin compétent·e.

### **Que se passe-t-il pour la/le patient·e en cas de participation ?**

- La durée de l'étude est de 3 mois pour chaque participant·e ou de 1 an si la/le participant·e est inclus·e dans **GEROBIOTA**.
- Un·e membre du personnel de l'étude vous contactera à 1 mois, 3 mois et un an (si inclusion dans **GEROBIOTA**) par téléphone pour vous poser des questions sur l'état de santé de la/du participant·e (environ 5 min par appel).
- Dans le cadre de **GEROBIOTA**, la/le participant·e peut bénéficier d'un examen dentaire complet et d'une évaluation médicale de son âge.

### **Quels sont les bénéfices et les risques liés à la participation au projet ?**

- **Bénéfices pour les participant·e·s**

1  
2  
3  
4  
5 La participation à ce projet de recherche n'apportera à la/au participant·e aucun bénéfice direct.  
6 Par sa participation, la/le participant·e contribue à aider les futur·e·s patient·e·s.  
7

8  
9 **▪ Risques et contraintes**

10 Une radiographie est l'examen radiologique le plus fréquent et présente une faible exposition  
11 aux rayonnements.  
12

13 Pour le CT thoracique, l'exposition aux rayonnements est également faible (en dessous de  
14 l'exposition de la population suisse à la radioactivité toute l'année) et il n'y a pas d'injection de  
15 produit de contraste.  
16

17 L'échographie pulmonaire ne produit pas de rayonnement ionisant.  
18

19 On ne sait toujours pas quelle est la meilleure stratégie diagnostique. La présente étude fournira  
20 des réponses à ce sujet.  
21

22 Les risques associés à l'étude sont minimes et les résultats escomptés peuvent être très  
23 bénéfiques à long terme pour les patient·e·s atteint·e·s d'une pneumonie.  
24  
25  
26  
27

28 En apposant votre signature à la fin du document, vous certifiez en avoir compris tout le contenu et  
29 accorder librement votre consentement pour la participation de la/du patient·e·s au projet.  
30  
31  
32  
33  
34  
35  
36  
37  
38  
39  
40  
41  
42  
43  
44  
45  
46  
47  
48  
49  
50  
51  
52  
53  
54  
55  
56  
57  
58  
59  
60

## Information détaillée

### 1. Objectif du projet et sélection des participant-e-s

Dans cette feuille d'information, notre projet de recherche est aussi simplement désigné par le terme *étude*. Si vous accordez votre consentement, en votre qualité de proche ou de représentant-e légal-e, pour la participation de la/du patient-e, cette/ce derni-ère-er est un-e *participant-e à l'étude*.

Nous faisons une étude pour comparer 3 méthodes diagnostiques dans la pneumonie de la personne de plus de 65 ans : la radiographie thoracique, le scanner thoracique à faible irradiation, qui permet l'acquisition d'images plus fines, et l'échographie ou ultrasonographie (US), qui n'engendre pas d'irradiation. La radiographie thoracique est l'examen effectué en routine dans le diagnostic de la pneumonie. Mais elle peut être difficile à interpréter, notamment chez des personnes âgées. D'autres maladies peuvent parfois mimer la pneumonie (bronchite, insuffisance cardiaque...). Or il est essentiel que le diagnostic soit réalisé le plus précisément possible dès les premières heures de l'arrivée à l'hôpital de votre proche afin de lui administrer le traitement adéquat. Un diagnostic plus précis permettrait d'éviter la prescription assez systématique d'antibiotiques. Cette étude pourra montrer si le scanner permet d'améliorer le diagnostic de la pneumonie et de mieux ajuster le traitement par antibiotique en comparaison à la radiographie et à l'échographie.

Certains facteurs de risque de pneumonie ont été identifiés (difficulté à avaler par exemple) mais d'autres sont moins connus comme un mauvais état dentaire. Si vous donnez votre accord, il sera également possible à votre proche de participer à l'étude **GEROBIOTA** qui porte sur le lien entre pneumonie et état de santé dentaire et présence de bactéries dans la bouche et les voies respiratoires (microbiote).

L'étude **Pneumoscope** permettra d'évaluer les performances d'un stéthoscope couplé à de l'intelligence artificielle.

Nous vous sollicitons en votre qualité de proche ou de représentant-e légal-e, car la participation à **OCTOPLUS** est ouverte à toutes les personnes de plus de 65 ans qui ont une suspicion de pneumonie. Elle est fermée aux personnes qui ont eu une pneumonie les trois derniers mois, qui ont déjà eu un scanner thoracique ou qui doivent en avoir un avec une injection, et dont la pneumonie est grave et nécessite un transfert aux soins intensifs.

Un-e médecin indépendant-e de l'étude a déjà été consulté-e pour donner son avis quant à l'absence de risque de votre proche à participer à cette étude.

Il sera proposé aux patient-e-s de Genève et Berne de participer à l'étude **GEROBIOTA** et à **Pneumoscope**.

### 2. Informations générales sur le projet

Il s'agit d'une étude nationale suisse qui porte sur 500 patient-e-s consultant aux urgences pour pneumonie. Chacun-e aura une radiographie, un scanner et une échographie des poumons. Les participant-e-s seront réparti-e-s de façon aléatoire dans 3 groupes en fonction de l'imagerie rendue accessible à la/au médecin. Dans le 1er groupe, la/le médecin aura uniquement accès au résultat de la radiographie, dans le 2ème au scanner et dans le 3ème à l'échographie.

L'étude durera globalement 2 ans et le suivi des participant-e-s se fera pendant 3 mois, voire un an pour les participant-e-s inclus-e-s dans l'étude **GERIOBOTA**.

**GEROBIOTA** : il s'agit de mieux connaître les facteurs de risque de la pneumonie chez les plus de 65 ans. Il sera proposé aux patient-e-s inclus-e-s de bénéficier d'une évaluation gériatrique et d'un

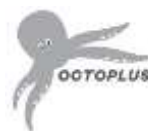

examen bucco-dentaire lors de leur hospitalisation et de faire partie d'une **biobanque** (collection et conservation d'échantillons biologiques à des fins de recherche).

**Pneumoscope** : il s'agit de voir si un stéthoscope couplé à de l'intelligence artificielle permet d'améliorer le diagnostic de pneumonie.

Cette étude est réalisée dans le respect des prescriptions de la législation suisse. Nous suivons en outre l'ensemble des directives reconnues au niveau international. La commission d'éthique compétente a examiné et autorisé l'étude.

Vous trouverez aussi un descriptif de l'étude sur le site Internet de l'Office fédéral de la santé publique : [www.kofam.ch](http://www.kofam.ch) (SNCTP000003808).

### 3. Déroulement pour les participant·e·s

Les 3 imageries seront réalisées aux urgences mais seule l'une d'entre elle sera immédiatement accessible à la/au médecin des urgences. Finalement, au 5ème jour, les résultats des deux autres imageries qui étaient masqués seront de nouveau rendus disponibles.

**PNEUMOSCOPE** : un stéthoscope enregistrant les bruits pulmonaires sera utilisé pour ausculter les participant·e·s aux urgences.

**GEROBIOTA** : examen dentaire et un examen gériatrique (durée de 30 à 45 minutes chacun) seront réalisés.

Un personnel de l'étude prendra de ses nouvelles par téléphone à 1 et 3 mois, et à un an si vous avez accepté qu'elle/il participe à **GEROBIOTA**. Ces entretiens téléphoniques dureront moins de 5 minutes chacun.

Si vous avez donné votre accord pour la **biobanque**, un prélèvement de salive et sang sera réalisé à l'entrée et à la sortie de l'hôpital (pas plus de 30 ml au total), avec congélation de matériel respiratoire restant (crachat, aspiration trachéale ou lavage broncho-alvéolaire le cas échéant, frottis naso-pharyngé).

Vous pouvez à tout moment retirer votre proche de l'étude si vous le souhaitez. Les données médicales et le matériel biologique (échantillons de sang, tissus, etc.) recueillis jusque-là seront tout de même analysés, ceci afin de ne pas compromettre la valeur de l'étude dans son ensemble. Il est impossible de rendre les données et le matériel biologique de votre proche anonymes, c.-à-d. que les données et le matériel biologique resteront codés. Vous devez donc être d'accord avec cela avant de donner votre consentement.

### 4. Bénéfices pour les participant·e·s

La participation de votre proche à cette étude ne lui apportera aucun bénéfice. Mais les résultats de l'étude pourraient se révéler importants par la suite pour les personnes touchées par une pneumonie.

### 5. Caractère facultatif de la participation et obligations

La participation à l'étude est entièrement libre. Si la/le participant·e ne souhaite pas participer ou si vous, en tant que proche ou représentant·e légal·e, revenez ultérieurement sur votre décision à ce sujet, vous n'aurez pas à vous justifier. Cette décision n'aura pas de répercussions défavorables sur la suite de sa prise en charge médicale. Si vous décidez de ne pas donner votre accord, votre proche bénéficiera d'une ou plusieurs des imageries citées ci-dessus pour faire le diagnostic selon la demande du médecin le prenant en charge. Vous pouvez à tout moment poser toutes les questions



Hôpitaux  
Universitaires  
Genève



nécessaires au sujet de l'étude. Veuillez-vous adresser pour ce faire à la Dre Prendki pour le site des 3-Chêne ou au Dr Stirnemann pour le site de Cluse-Roseraie.

La participation à l'étude implique les obligations suivantes :

La/le participant·e·s est tenu·e·s de suivre les instructions et de remplir les exigences prévues par le protocole de recherche : réalisation de la radiographie, du scanner et de l'échographie aux urgences.

La/le médecin-investigat·rice·eur doit être informé(e) de l'évolution de la maladie et il convient de lui signaler tout nouveau symptôme, tout nouveau trouble et tout changement dans l'état de la/du patient·e.

## 6. Risques et contraintes pour les participant·e·s

La radiographie est la technique la plus couramment utilisée et est faiblement irradiante. Le scanner thoracique est à faible irradiation (moindre que l'irradiation annuelle en Suisse) et ne comprend pas d'injection. L'échographie n'est pas irradiante et réalisée par les médecins des urgences. Les risques inhérents au projet sont minimaux et les résultats attendus pourraient apporter un bénéfice à long terme aux personnes ayant une pneumonie.

### Tableau récapitulatif des contraintes selon chaque étude

| OCTOPLUS                                                                 | GEROBIOTA                                                                                                         | PNEUMOSCOPE                                       |
|--------------------------------------------------------------------------|-------------------------------------------------------------------------------------------------------------------|---------------------------------------------------|
| Réalisation de la radiographie, scanner et de l'échographie aux urgences | Aux urgences : prélèvement de sang (30 ml), salive, matériel respiratoire réalisé en routine ( <b>biobanque</b> ) | Enregistrement de bruits pulmonaires aux urgences |
| Suivi par personnel de l'étude tous les jours pendant l'hospitalisation  | Lors de l'hospitalisation :<br>Examen bucco-dentaire (30-45 min)<br>Evaluation gériatrique (30 à 45 min)          |                                                   |
| Appel téléphonique à 1 et 3 mois (5 min)                                 | Avant la sortie : salive et sang ( <b>biobanque</b> )                                                             |                                                   |
|                                                                          | Appel téléphonique à 1 an (5 min)                                                                                 |                                                   |

## 7. Alternatives

La participation à l'étude présente des bénéfices et des risques. Si vous décidez de ne pas donner votre accord, votre proche bénéficiera d'une ou plusieurs des imageries citées ci-dessus pour faire le diagnostic selon la demande de la/du médecin le prenant en charge. La/le médecin-investigat·rice·eur vous conseillera à ce sujet lors de l'entretien.

## 8. Résultats

L'étude permet d'obtenir différents résultats :

- des résultats individuels qui concernent directement la/le patient·e,
- des résultats individuels découverts par hasard (ce qu'on appelle les découvertes fortuites),
- les résultats définitifs objectifs de l'étude dans son ensemble.

a) Au cours de l'étude, la/le médecin-investigat·rice·eur vous avisera, en votre qualité de proche ou de représentant·e légal·e, de toute nouvelle découverte importante pour la/le participant·e. Vous serez informé·e oralement et par écrit ; vous pourrez par la suite à nouveau décider si la/le patient·e doit poursuivre sa participation à l'étude.



2. Les découvertes fortuites constituent des « résultats concomitants », à savoir des résultats qui n'ont pas été explicitement recherchés, mais qui ont été obtenus par hasard. Il peut s'agir p. ex. de résultats d'analyses génétiques ou de procédés d'imagerie (nodules pulmonaires).

Vous serez informé-e des découvertes fortuites si elles ont une incidence sur la santé de la/du patient-e. Cela signifie que ces découvertes sont communiquées si l'on constate par hasard une pathologie qui n'était pas encore connue jusqu'alors ou que l'on peut empêcher l'apparition d'une maladie par des mesures de prévention.

## **9. Confidentialité des données et des échantillons**

### **9.1. Traitement et codage des données**

Dans le cadre de cette étude, des données relatives à la santé de la/du patient-e sont recueillies et traitées, en partie de manière automatisée. Ces informations sont codées au moment du relevé. Le codage signifie que toutes les données permettant d'identifier la/le patient-e (nom, date de naissance, etc.) sont effacées et remplacées par un code. Il n'est pas possible de relier les données de la/du patient-e sans le code, qui reste en permanence au sein de l'hôpital. Seul un nombre limité de personnes peut consulter les données de la/du patient-e sous une forme non codée, et ce, exclusivement pour pouvoir accomplir les tâches nécessaires au déroulement de l'étude. Ces personnes sont tenues au secret professionnel. En votre qualité de proche ou de représentant-e légal-e, vous avez le droit de consulter les données de la/du patient-e.

### **9.2. Protection des données et des échantillons**

Toutes les directives relatives à la protection des données sont rigoureusement respectées. Il est possible que les données doivent être transmises sous forme codée, par exemple pour une publication, et qu'elles puissent être mises à la disposition d'autres chercheurs. Lorsque des données relatives à la santé ou des échantillons biologiques sont conservés sur place, ils constituent une banque de données ou une biobanque à des fins de recherche. Il se peut que ces données et ces échantillons soient envoyés sous forme codée dans le cadre de cette étude à une autre banque de données/biobanque. Le promoteur doit s'assurer que le pays de destination garantit une protection des données équivalente à celle garantie en Suisse.

La partie du matériel biologique qui a été mise à disposition dans le cadre de la participation à l'étude par l'Institut de pathologie n'est en règle générale plus disponible à des fins diagnostiques.

Il se peut que la/le médecin chargé-e du suivi de la/du patient-e soit contacté-e pour des renseignements sur l'état de santé de cette dernière.

### **9.3. Protection des données en cas de réutilisation**

Les données et les échantillons de la/du patient-e pourraient ultérieurement se révéler importants pour répondre à d'autres questionnements et/ou être envoyés à une autre banque de données/biobanque située en Suisse ou à l'étranger pour être aussi exploités dans d'autres projets de recherche (réutilisation). Cette banque de données/biobanque doit toutefois obéir aux mêmes normes et exigences que la banque de données/biobanque de la présente étude.

Pour cette réutilisation, nous vous prions de signer, en votre qualité de proche ou de responsable légal, une déclaration de consentement séparée à la fin de cette feuille d'information. Ce deuxième consentement est indépendant de la participation de la/du patient-e à l'étude.

### **9.4. Protection des données en cas d'analyses génétiques**

Dès lors que l'on procède à un relevé, un enregistrement ou une transmission de données issues des échantillons de la/du patient-e dans le cadre de la recherche génétique, il existe des risques liés à la confidentialité (p. ex., la possibilité d'identifier la/le patient-e), en particulier concernant les informations sur son matériel génétique. Ces risques ne peuvent pas être totalement exclus et augmentent avec la quantité de données pouvant être appariées, notamment si la/le patient-e a publié ou publiera ses données génétiques sur Internet (p. ex. à des fins de recherche généalogique). Les informations relatives au matériel génétique de la/du patient-e peuvent

également être importantes pour les membres de sa famille. Par ailleurs, les résultats d'analyses génétiques doivent être communiqués, sous certaines conditions, avant la conclusion d'une assurance-vie. Le promoteur prend toutes les mesures nécessaires pour réduire le plus possible les risques liés à la confidentialité pour la/le patient·e.

### 9.5. Droit de consultation dans le cadre d'inspections

L'étude peut faire l'objet d'inspections. Celles-ci peuvent être effectuées par la commission d'éthique compétente, par l'autorité suisse de contrôle et d'autorisation des produits thérapeutiques Swissmedic ou par le promoteur qui a initié l'étude. La/le médecin-investigat·rice·eur doit alors communiquer les données de la/du patient·e pour les besoins de ces inspections. Toutes les personnes impliquées sont tenues au plus strict secret professionnel.

### 10. Retrait du projet

La/le patient·e peut à tout moment se retirer de l'étude et mettre fin à sa participation si elle/s'il le souhaite ou que vous en décidez ainsi en tant que proche ou représentant·e légal·e. Cependant, les données médicales et le matériel biologique recueillis jusque-là pourront encore être analysés sous forme codée.

En cas de retrait, les données et les échantillons de la/du patient·e continuent de figurer sous forme codée dans les documents de l'étude, en premier lieu pour assurer la sécurité médicale. Vous devez vérifier si vous êtes d'accord avec cela avant de donner votre consentement.

### 11. Dédommagement

Si votre proche participe à cette étude, il ne recevra aucune compensation. Seule l'imagerie mise à disposition immédiatement sera facturée, et la participation à l'étude n'entraînera aucun frais supplémentaire pour votre proche ou son assurance-maladie.

### 12. Responsabilité

Les Hôpitaux Universitaires de Genève qui ont initié l'étude et sont chargés de sa réalisation sont responsables des dommages que pourrait subir la/le patient·e en relation avec les activités de recherche. Les conditions et la procédure sont fixées par la loi. Bien que ces recherches ne présentent pas de risque prévisible, l'institution (le promoteur) est responsable, en vertu des dispositions légales, de tout dommage pouvant survenir dans le cadre de l'étude.

Si la/le patient·e subissait un dommage du fait de sa participation à l'étude, il vous faudrait vous adresser à la/au médecin-investigat·rice·eur.

### 13. Financement de l'étude

L'étude est majoritairement financée par le Fond National Suisse et la Ligue Pulmonaire Genevoise.

### 14. Interlocuteur(s)

Vous pouvez à tout moment poser des questions au sujet de l'étude. En cas de doutes, de craintes ou d'urgence pendant ou après l'étude, vous pouvez vous adresser à l'un des interlocuteurs suivants :

- Dre Virginie Prendki, médecin adjointe agrégée, Hôpital Trois-Chêne, HUG, Chemin du Pont-Bochet 3, 1226 Thônex (tel : +4179 55 38308).
- Dr Jérôme Stirnemann, Hôpital Cluse-Roseraie, HUG, Rue Gabrielle-Perret-Gentil 4, 1205 Genève (+4179 553 44 08)

### 15. Glossaire (termes nécessitant une explication)

#### ▪ Promoteur

Le promoteur est une personne ou une institution ayant son siège ou une représentation en Suisse qui prend l'initiative d'une étude, c.-à-d. qui porte la responsabilité de son lancement, de sa gestion et de son financement dans ce pays.

## Déclaration de consentement

### Déclaration de consentement écrite pour la participation à une étude clinique

Veillez lire attentivement ce formulaire. N'hésitez pas à poser des questions lorsque vous ne comprenez pas quelque chose ou que vous souhaitez avoir des précisions. Votre consentement écrit est nécessaire pour la participation de la/du patient·e.

|                                                                                                      |                                                                                                                                                           |
|------------------------------------------------------------------------------------------------------|-----------------------------------------------------------------------------------------------------------------------------------------------------------|
| <b>Numéro BASEC du projet de recherche (après soumission à la commission d'éthique compétente) :</b> | <b>2019-01288</b>                                                                                                                                         |
| <b>Titre (scientifique et usuel) :</b>                                                               | <b>OCTOPLUS : comparaison du scanner thoracique à la radiographie et l'ultrasonographie dans le diagnostic de la pneumonie du sujet de plus de 65 ans</b> |
| <b>Institution responsable (promoteur et adresse complète) :</b>                                     | <b>Hôpitaux Universitaires de Genève<br/>Rue Gabrielle-Perret-Gentil 4<br/>1205 Genève (Suisse)</b>                                                       |
| <b>Lieu de réalisation :</b>                                                                         | <b>Hôpitaux Universitaires de Genève</b>                                                                                                                  |
| <b>Médecin-investigat·rice·eur responsable sur le site :</b>                                         | <b>Hôpital des 3-Chêne : Dre Virginie Prendki</b>                                                                                                         |
| Nom et prénom en caractères d'imprimerie :                                                           | <b>Hôpital de Cluse-Roseraie : Dr. Jérôme Stirnemann</b>                                                                                                  |

### Participant·e :

Nom et prénom en caractères d'imprimerie :

Date de naissance :

- En ma qualité de proche de représentant·e légal·e de la/du patient·e susmentionné·e, j'ai obtenu les informations écrites et orales de la part de l'investigat·rice·eur soussigné·e sur les objectifs et le déroulement de l'étude mettant en œuvre une nouvelle procédure de diagnostic des pneumonies ainsi que les avantages et les inconvénients possibles et les risques éventuels.
- Je confirme prendre la décision dans le sens du proche ou de la personne placée sous ma responsabilité, à savoir, qu'elle/il participe à l'essai clinique. En son nom, j'accepte les informations écrites et orales. J'ai eu suffisamment de temps pour prendre ma décision.
- J'ai reçu les réponses aux questions que j'ai posées en relation avec la participation à cette étude. Je conserve la feuille d'information et reçois une copie de ma déclaration de consentement.
- J'ai été informé·e des alternatives de méthode de diagnostique au projet.
- J'accepte que la/le médecin traitant·e de la/du patient·e soit informé·e de sa participation au projet de recherche.
- En cas de traitement ultérieur en dehors du lieu de réalisation de cette étude, j'autorise la/le ou les médecins à fournir à la/au médecin-investigat·rice·eur les données post-traitement de la/du patient·e pertinentes pour l'étude.
- J'accepte que les spécialistes compétent·e·s du promoteur de ce projet, de la commission d'éthique compétente et de l'autorité suisse de contrôle et d'autorisation des produits thérapeutiques (Swissmedic) puissent consulter les données non codées de la/du patient·e afin de procéder à des contrôles et des inspections, à condition toutefois que la confidentialité de ces données soit strictement assurée.



- Je serai informé·e en lieu et place de la/du patient·e des résultats et/ou de toute découverte fortuite ayant une incidence directe sur sa santé. Si j'estime que cela ne correspond pas à la volonté du participant·e à l'étude, j'en avise la/le médecin-investigat·rice·eur.
- Je sais que les données personnelles (et les échantillons) peuvent être transmis·e·s à des fins de recherche dans le cadre de cette étude et uniquement sous une forme codée. Le promoteur assure une protection des données conforme aux normes et exigences suisses.
- Au nom de la/du patient·e, je peux, à tout moment et sans avoir à me justifier, révoquer mon consentement à la participation, sans que cette décision n'ait de répercussions défavorables sur la suite de sa prise en charge. Les données et les échantillons recueillis jusqu'au retrait seront cependant analysés dans le cadre de l'étude.
- Je suis informé·e que l'assurance-responsabilité civile de l'hôpital couvre les dommages éventuels imputables au projet.
- Je suis conscient·e que les obligations mentionnées dans la feuille d'information destinée aux participant·e·s doivent être respectées pendant toute la durée de l'étude. La/le médecin-investigat·rice·eur peut exclure la/le patient·e du projet à tout moment dans l'intérêt de sa santé.

#### Attestation de la/du proche, de la/du représentant·e légal·e :

Par la présente, j'atteste/nous attestons que l'entretien informatif a eu lieu que l'adulte incapable de discernement a consenti à participer à cette étude et/ou qu'il n'y a aucun signe d'opposition à sa participation.

|                     |                                                                                                                                                                                                                                                                                                                                                                                                                                                                                                                                                                                                     |
|---------------------|-----------------------------------------------------------------------------------------------------------------------------------------------------------------------------------------------------------------------------------------------------------------------------------------------------------------------------------------------------------------------------------------------------------------------------------------------------------------------------------------------------------------------------------------------------------------------------------------------------|
| Lieu, date et heure | Nom et prénom en caractères d'imprimerie :<br><br>Relation avec la/le patient·e (conjoint/e/fils ou fille, etc.) :<br><br>Je donne mon accord pour OCTOPLUS : <input type="checkbox"/> Oui <input type="checkbox"/> Non<br>Je donne mon accord pour GEROBIOITA : <input type="checkbox"/> Oui <input type="checkbox"/> Non<br>Je donne mon accord pour la biobanque : <input type="checkbox"/> Oui <input type="checkbox"/> Non<br>Je donne mon accord pour Pneumoscope : <input type="checkbox"/> Oui <input type="checkbox"/> Non<br>Signature de la/du proche, de la/du représentant·e légal·e : |
|---------------------|-----------------------------------------------------------------------------------------------------------------------------------------------------------------------------------------------------------------------------------------------------------------------------------------------------------------------------------------------------------------------------------------------------------------------------------------------------------------------------------------------------------------------------------------------------------------------------------------------------|

**Attestation de la/du médecin-investigat·rice·eur ou de la personne investigatrice :** Par la présente, j'atteste avoir expliqué à la personne représentant la/le patient·e l'importance et la portée de l'étude. Je déclare satisfaire à toutes les obligations en relation avec cette étude conformément au droit suisse en vigueur. Si je devais, à quelque moment que ce soit durant la réalisation de l'étude, prendre connaissance d'éléments susceptibles d'influer sur le consentement de la/du participant·e à prendre part au projet, je m'engage à en informer immédiatement la personne la/le représentant.

|                     |                                                                                                                           |
|---------------------|---------------------------------------------------------------------------------------------------------------------------|
| Lieu, date et heure | Nom et prénom de la personne investigatrice en caractères d'imprimerie :<br><br>Signature de la personne investigatrice : |
|---------------------|---------------------------------------------------------------------------------------------------------------------------|

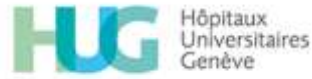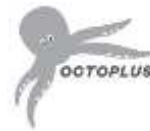

1  
2  
3  
4  
5  
6  
7  
8  
9  
10  
11  
12  
13  
14  
15  
16  
17  
18  
19  
20  
21  
22  
23  
24  
25  
26  
27  
28  
29  
30  
31  
32  
33  
34  
35  
36  
37  
38  
39  
40  
41  
42  
43  
44  
45  
46  
47  
48  
49  
50  
51  
52  
53  
54  
55  
56  
57  
58  
59  
60

For peer review only

**Déclaration de consentement écrite dée pour la réutilisation de données (génétique) et d'échantillons biologiques de CETTE étude sous forme codée.**

|                                                                                                      |                                                                                                                                                           |
|------------------------------------------------------------------------------------------------------|-----------------------------------------------------------------------------------------------------------------------------------------------------------|
| <b>Numéro BASEC du projet de recherche (après soumission à la commission d'éthique compétente) :</b> | <b>2019-01288</b>                                                                                                                                         |
| <b>Titre (scientifique et usuel) :</b>                                                               | <b>OCTOPLUS : comparaison du scanner thoracique à la radiographie et l'ultrasonographie dans le diagnostic de la pneumonie du sujet de plus de 65 ans</b> |
| <b>Participant-e :</b><br>Nom et prénom en caractères d'imprimerie :<br>Date de naissance :          |                                                                                                                                                           |

- J'accepte que les données (génétiques) et le matériel biologique de la/du patient-e obtenus dans le cadre de cette étude puissent être réutilisés à des fins de recherche médicale sous forme codée. Cela signifie que le matériel biologique sera conservé dans une biobanque et ultérieurement exploité pour une durée indéfinie dans le cadre de futurs projets de recherche.
- Je sais que les données et le matériel biologique de la/du patient-e sont conservés sous forme codée et que la liste d'identification est gardée dans un lieu sûr. Les données et matériel biologique peuvent être envoyés à des fins d'analyse à une autre biobanque située en Suisse ou à l'étranger, à condition qu'elle obéisse à des normes et exigences au moins équivalentes aux normes et exigences suisses. Toutes les dispositions légales relatives à la protection des données sont respectées.
- Je donne mon accord de façon volontaire et je peux à tout moment revenir sur ma décision. Je dois simplement en informer la/le médecin-investigat·rice·eur et je n'ai pas à justifier ma décision.
- Généralement, les données et le matériel biologique sont exploités de manière globale et les résultats sont publiés de manière synthétique. Dans le cas où l'analyse des données révélait une découverte pertinente pour la santé de la/du patient-e, la/le médecin-investigat·rice·eur me contactera. Si je ne souhaite pas en être informé, il m'incombe de l'annoncer à la/au médecin-investigat·rice·eur.
- Je renonce à tout droit d'exploitation commerciale sur le matériel biologique qui m'a été prélevé et sur mes données.

**Attestation de la/du proche, de la/du représentant-e légal-e : :**

Par la présente, j'atteste que l'entretien informatif a eu lieu et que l'adulte incapable de discernement a consenti à participer à cette étude et/ou qu'il n'y a aucun signe d'opposition à sa participation.

|                       |                                                                                                                                                                                                      |
|-----------------------|------------------------------------------------------------------------------------------------------------------------------------------------------------------------------------------------------|
| Lieu, date et heure : | Nom et prénom en caractères d'imprimerie :<br><br><br>Relation avec la/le participant-e : (conjoint/e/fils ou fille, etc.) :<br><br><br>Signature de la/du proche, de la/du représentant-e légal-e : |
|-----------------------|------------------------------------------------------------------------------------------------------------------------------------------------------------------------------------------------------|



1  
2  
3  
4  
5 **Attestation de la personne investigatrice** : Par la présente, j'atteste avoir expliqué à la personne  
6 représentant la/le patient-e l'importance et la portée de la réutilisation des échantillons biologiques  
7 et/ou des données génétiques.

8 Lieu, date et heure : Nom et prénom de la personne investigatrice en caractères d'imprimerie :

9  
10  
11 Signature de la personne investigatrice :  
12  
13  
14  
15  
16

17  
18  
19  
20  
21  
22  
23  
24  
25  
26  
27  
28  
29  
30  
31  
32  
33  
34  
35  
36  
37  
38  
39  
40  
41  
42  
43  
44  
45  
46  
47  
48  
49  
50  
51  
52  
53  
54  
55  
56  
57  
58  
59  
60

For peer review only

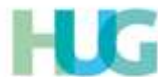

Hôpitaux  
Universitaires  
Genève

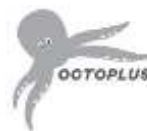

## Confirmation écrite d'un·e médecin non associé·e au projet de recherche

**Confirmation écrite pour le/la médecin non associé·e au projet de recherche, qui n'est pas impliqué·e dans le projet de recherche mentionné ci-après et qui défend les intérêts de la personne se prêtant à l'expérience (LRH art 30).**

### Données sur l'essai clinique

|                                                                                                                                                                                    |                    |
|------------------------------------------------------------------------------------------------------------------------------------------------------------------------------------|--------------------|
| Titre du projet de recherche: <b>OCTOPLUS : comparaison du scanner thoracique à la radiographie et l'échographie dans le diagnostic de la pneumonie du sujet de plus de 65 ans</b> |                    |
| Numéro du projet de recherche: <b>2019-01288</b>                                                                                                                                   |                    |
| Lieu où se déroule le projet de recherche : <b>Hôpitaux Universitaires de Genève</b>                                                                                               |                    |
| Nom et prénom de la médecin investigatrice responsable: <b>Dre Virginie Prendki</b>                                                                                                |                    |
| <b>Nom et prénom du/ de la participant·e:</b>                                                                                                                                      |                    |
| Date de naissance (facultatif):                                                                                                                                                    | sexe (facultatif): |

J'ai reçu et j'ai lu le résumé du protocole de l'essai clinique susmentionné.

J'atteste que les intérêts de la/du participant·e sont respectés et que son suivi médical est garanti.

|                     |                                                                                                                       |                                                                 |
|---------------------|-----------------------------------------------------------------------------------------------------------------------|-----------------------------------------------------------------|
| Lieu, date et heure | Nom, prénom et numéro de téléphone de la/du médecin non associé·e au projet de recherche (en caractères d'imprimerie) | Signature de la/du médecin non associé·e au projet de recherche |
|---------------------|-----------------------------------------------------------------------------------------------------------------------|-----------------------------------------------------------------|

Par la présente, j'atteste avoir expliqué à la/au médecin non associé·e au projet de recherche la nature, l'importance et la portée du projet. Si je devais prendre connaissance, à quelque moment que ce soit durant la réalisation du projet, d'éléments susceptibles d'influer sur le consentement de la/du participant·e à prendre part au projet de recherche, je m'engage à l'en informer immédiatement.

|                     |                                                                                                     |                                               |
|---------------------|-----------------------------------------------------------------------------------------------------|-----------------------------------------------|
| Lieu, date et heure | Nom, prénom et numéro de téléphone de l'investigatrice·eur responsable (en caractères d'imprimerie) | Signature de l'investigatrice·eur responsable |
|---------------------|-----------------------------------------------------------------------------------------------------|-----------------------------------------------|
