# Supplementary material for: LOw-dose CT Or Lung UltraSonography versus standard of care based-strategies for the diagnosis of pneumonia in the elderly: protocol for a multicentre randomised controlled trial (OCTOPLUS)
Source: PubMed Central journal article supplement — BMJ Open. 2022 May 6;12(5):e055869. doi: 10.1136/bmjopen-2021-055869 (PMC9083386; doi:10.1136/bmjopen-2021-055869), 2022-05-06
Supplement: bmjopen-2021-055869supp002.pdf [file bmjopen-2021-055869supp002.pdf]

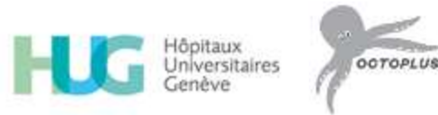

Demande de participation à un projet de recherche médical :

---

### **OCTOPLUS : comparaison du scanner thoracique à la radiographie et l'ultrasonographie dans le diagnostic de la pneumonie du sujet de plus de 65 ans**

---

Madame, Monsieur,

Vous venez d'être hospitalisé(e) pour une suspicion de pneumonie et nous vous proposons de participer au projet de recherche que nous décrivons dans cette feuille d'information.

Deux situations sont possibles :

- Vous êtes actuellement aux urgences et aucune intervention liée à l'étude n'a encore été effectuée.
- Lors de votre passage aux urgences, vous ne possédiez pas votre capacité de discernement et un·e médecin indépendant·e de l'étude a déjà autorisé que des interventions en lien avec l'étude soient effectuées (*les passages en italique vous concernent*).

Votre participation est entièrement libre. Toutes les données collectées dans le cadre de ce projet sont soumises à des règles strictes en matière de protection des données.

Le projet de recherche est mené par les Hôpitaux Universitaires de Genève. Nous vous en communiquerons les résultats si vous le souhaitez.

Lors d'un entretien, nous vous présenterons les éléments essentiels et répondrons à vos questions. Pour vous proposer d'ores et déjà un aperçu du projet, voici les points clés à retenir. Vous trouverez à la suite des informations complémentaires plus détaillées.

#### **Pourquoi menons-nous ce projet de recherche ?**

- Cette étude étudie la meilleure façon de diagnostiquer une pneumonie chez des patient·e·s de plus de 65 ans. Trois techniques d'imagerie différentes du thorax sont comparées : les rayons X, le scanner à faible irradiation (CT) et l'échographie (US).
- Cette étude est réalisée chez 500 patient·e·s chez qui une pneumonie est suspectée.
- Même si tous les participant·e·s inclus·e·s dans l'étude ont les trois examens d'imagerie mentionnés ci-dessus, elles/ils sont réparti·e·s au hasard en trois groupes, le résultat initial de l'un des trois examens étant mis à la disposition de la /du médecin compétent·e.

#### **Que se passe-t-il pour moi en cas de participation ?**

- La durée de l'étude est de 3 mois ou de 1 an si vous participez à **GEROBIOTA**.
- Un·e membre du personnel de l'étude vous contactera à 1 mois, 3 mois et un an (si inclusion dans **GEROBIOTA**) par téléphone pour vous poser des questions sur votre état de santé (environ 5 min par appel).
- Dans le cadre de **GEROBIOTA**, vous pourrez bénéficier d'un examen dentaire complet et d'une évaluation médicale de votre âge.



### Quels sont les bénéfices et les risques liés à la participation au projet ?

- **Bénéfices pour les participants**

La participation à ce projet de recherche ne vous apportera aucun bénéfice direct. Par sa participation, vous contribuez à aider les futur·e·s patient·e·s.

- **Risques et contraintes**

Une radiographie est l'examen radiologique le plus fréquent et présente une faible exposition aux rayonnements.

Pour le CT thoracique, l'exposition aux rayonnements est également faible (en dessous de l'exposition de la population suisse à la radioactivité toute l'année) et il n'y a pas d'injection de produit de contraste.

L'échographie pulmonaire ne produit pas de rayonnement ionisant.

On ne sait toujours pas quelle est la meilleure stratégie diagnostique. La présente étude fournira des réponses à ce sujet.

Les risques associés à l'étude sont minimes et les résultats escomptés peuvent être très bénéfiques à long terme pour les patient.e.s atteints d'une pneumonie.

En apposant votre signature à la fin du document, vous certifiez en avoir compris tout le contenu et accorder librement votre consentement pour votre participation au projet.

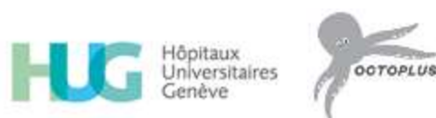

## Information détaillée

### 1. Objectif du projet et sélection des participant·e·s

Dans cette feuille d'information, notre projet de recherche est aussi simplement désigné par le terme *étude*. Si vous accordez votre consentement pour votre participation vous serez un·e *participant·e* à l'*étude*.

Nous faisons une étude pour comparer 3 méthodes diagnostiques dans la pneumonie de la personne de plus de 65 ans : la radiographie thoracique, le scanner thoracique à faible irradiation, qui permet l'acquisition d'images plus fines, et l'échographie ou ultrasonographie (US), qui n'engendre pas d'irradiation. La radiographie thoracique est l'examen effectué en routine dans le diagnostic de la pneumonie. Mais elle peut être difficile à interpréter, notamment chez des personnes âgées. D'autres maladies peuvent parfois mimer la pneumonie (bronchite, insuffisance cardiaque...). Or il est essentiel que le diagnostic soit réalisé le plus précisément possible dès les premières heures de votre arrivée à l'hôpital afin de vous administrer le traitement adéquat. Un diagnostic plus précis permettrait d'éviter la prescription assez systématique d'antibiotiques. Cette étude pourra montrer si le scanner permet d'améliorer le diagnostic de la pneumonie et de mieux ajuster le traitement par antibiotique en comparaison à la radiographie et à l'échographie.

Certains facteurs de risque de pneumonie ont été identifiés (difficulté à avaler par exemple) mais d'autres sont moins connus comme un mauvais état dentaire. Si vous donnez votre accord, vous pourrez participer à l'étude **GEROBIOTA** qui porte sur le lien entre pneumonie et état de santé dentaire et présence de bactéries dans la bouche et les voies respiratoires (microbiote).

L'étude **Pneumoscope** permettra d'évaluer les performances d'un stéthoscope couplé à de l'intelligence artificielle.

Nous vous sollicitons car la participation à **OCTOPLUS** est ouverte à toutes les personnes de plus de 65 ans qui ont une suspicion de pneumonie. Elle est fermée aux personnes qui ont eu une pneumonie les trois derniers mois, qui ont déjà eu un scanner thoracique ou qui doivent en avoir un avec une injection, et dont la pneumonie est grave et nécessite un transfert aux soins intensifs.

*Il se peut qu'un·e médecin indépendant·e de l'étude ait déjà été consulté·e pour donner son avis quant à l'absence de risque pour votre participation à cette étude, car vous étiez au moment de votre séjour aux urgences en incapacité de donner votre consentement. Vous pouvez maintenant décider si oui ou non vous souhaitez continuer à participer à l'étude.*

Il sera proposé aux patient·e·s de Genève et Berne de participer à l'étude **GEROBIOTA** et **Pneumoscope**.

### 2. Informations générales sur l'étude OCTOPLUS

Il s'agit d'une étude nationale suisse qui porte sur 500 patient·e·s consultant aux urgences pour pneumonie. Chacun·e aura une radiographie, un scanner et un US des poumons. Les participant·e·s seront réparti·e·s de façon aléatoire dans 3 groupes en fonction de l'imagerie rendue accessible à la/au médecin. Dans le 1<sup>er</sup> groupe, la/le médecin aura uniquement accès au résultat de la radiographie, dans le 2<sup>ème</sup>, au scanner et dans le 3<sup>ème</sup>, à l'échographie.

L'étude durera globalement 2 ans et votre suivi se fera pendant 3 mois, voire un an si vous participez à l'étude **GERIOBOTA**.

**GEROBIOTA** : il s'agit de mieux connaître les facteurs de risque de la pneumonie chez les plus de 65 ans. Si vous participez vous pourrez bénéficier d'une évaluation gériatrique et d'un examen bucco-dentaire lors de votre hospitalisation et de faire partie d'une **biobanque** (collection et conservation d'échantillons biologiques à des fins de recherche).



**Pneumoscope** : il s'agit de voir si un stéthoscope couplé à de l'intelligence artificielle permet d'améliorer le diagnostic de pneumonie.

Cette étude est réalisée dans le respect des prescriptions de la législation suisse. Nous suivons en outre l'ensemble des directives reconnues au niveau international. La commission d'éthique compétente a examiné et autorisé l'étude.

Vous trouverez aussi un descriptif de l'étude sur le site Internet de l'Office fédéral de la santé publique : [www.kofam.ch](http://www.kofam.ch) (SNCTP000003808).

### 3. Déroulement pour les participant.e.s

Les 3 imageries seront réalisées aux urgences (*ou ont déjà été réalisées, si vous ne possédiez pas votre capacité de décider aux urgences et qu'un.e médecin indépendant.e a donné son autorisation*) mais seule l'une d'entre elles sera immédiatement accessible à la/au médecin des urgences. Finalement, au 5<sup>ème</sup> jour, les résultats des deux autres imageries qui étaient masqués seront de nouveau rendus disponibles.

**PNEUMOSCOPE** : un stéthoscope enregistrant les bruits pulmonaires sera utilisé pour vous ausculter aux urgences.

**GEROBIOTA** : un examen dentaire et un examen gériatrique (durée de 30 à 45 minutes chacun) seront réalisés.

Un personnel de l'étude prendra de vos nouvelles par téléphone à 1 et 3 mois, et à un an si vous avez accepté de participer à **GEROBIOTA**. Ces entretiens téléphoniques dureront moins de 5 minutes chacun.

Si vous donnez votre accord pour la **biobanque**, un prélèvement de salive et sang sera réalisé à l'entrée et à la sortie de l'hôpital (pas plus de 30ml au total), avec congélation de matériel respiratoire restant (crachat, aspiration trachéale ou lavage broncho-alvéolaire le cas échéant, frottis nasopharyngé).

Vous pouvez à tout moment vous retirer de l'étude si vous le souhaitez. Les données médicales et le matériel biologique (échantillons de sang, tissus, etc.) recueillis jusque-là seront tout de même analysés, ceci afin de ne pas compromettre la valeur de l'étude dans son ensemble. Il est impossible de rendre vos données et votre matériel biologique anonymes, c.-à-d. que les données et le matériel biologique resteront codés. Vous devez donc être d'accord avec cela avant de donner votre consentement.

### 4. Bénéfices pour les participant.e.s

Votre participation à cette étude ne vous apportera aucun bénéfice. Mais les résultats de l'étude pourraient se révéler importants par la suite pour les personnes touchées par une pneumonie.

### 5. Caractère facultatif de la participation et obligations

La participation à l'étude est entièrement libre. Si vous ne souhaitez pas participer ou si vous, revenez ultérieurement sur votre décision à ce sujet, vous n'aurez pas à vous justifier. Cette décision n'aura pas de répercussions défavorables sur la suite de votre prise en charge médicale. Si vous décidez de ne pas donner votre accord, vous bénéficierez d'une ou plusieurs des imageries citées ci-dessus pour faire le diagnostic selon la demande du médecin vous prenant en charge. Vous pouvez à tout moment poser toutes les questions nécessaires au sujet de l'étude. Veuillez-vous adresser pour ce faire à la Dre Prendki pour le site des 3-Chêne ou au Dr Stirnemann pour le site de Cluse-Roseraie.

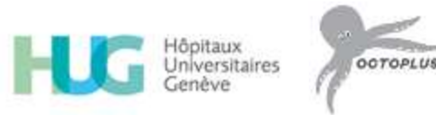

La participation à l'étude implique les obligations suivantes :

Vous êtes tenu·e de suivre les instructions et de remplir les exigences prévues par le protocole de recherche : réalisation de la radiographie, du scanner et de l'échographie aux urgences.

La/le médecin-investigat·rice·eur doit être informé(e) de l'évolution de la maladie et il convient de lui signaler tout nouveau symptôme, tout nouveau trouble et tout changement de votre état.

## 6. Risques et contraintes pour les participant.e.s

La radiographie est la technique la plus couramment utilisée et est faiblement irradiante. Le scanner thoracique est à faible irradiation (moindre que l'irradiation annuelle en Suisse) et ne comprend pas d'injection. L'échographie n'est pas irradiante et est réalisée par les médecins des urgences. Les risques inhérents au projet sont minimaux et les résultats attendus pourraient apporter un bénéfice à long terme aux personnes ayant une pneumonie.

### Tableau récapitulatif des contraintes selon chaque étude

| OCTOPLUS                                                                 | GEROBIOTA                                                                                                            | PNEUMOSCOPE                                       |
|--------------------------------------------------------------------------|----------------------------------------------------------------------------------------------------------------------|---------------------------------------------------|
| Réalisation de la radiographie, scanner et de l'échographie aux urgences | Aux urgences :<br>prélèvement de sang (30 ml), salive, matériel respiratoire réalisé en routine ( <b>biobanque</b> ) | Enregistrement de bruits pulmonaires aux urgences |
| Suivi par personnel de l'étude tous les jours pendant l'hospitalisation  | Lors de l'hospitalisation :<br>Examen bucco-dentaire (30-45 min)<br>Evaluation gériatrique (30 à 45 min)             |                                                   |
| Appel téléphonique à 1 et 3 mois (5 min)                                 | Avant la sortie : salive et sang ( <b>biobanque</b> )                                                                |                                                   |
|                                                                          | Appel téléphonique à 1 an (5 min)                                                                                    |                                                   |

## 7. Alternatives

La participation à l'étude présente des bénéfices et des risques. Si vous décidez de ne pas donner votre accord, vous bénéficierez d'une ou plusieurs des imageries citées ci-dessus pour faire le diagnostic selon la demande du médecin le prenant en charge. La/le médecin-investigat·rice·eur vous conseillera à ce sujet lors de l'entretien.

## 8. Résultats

L'étude permet d'obtenir différents résultats :

- des résultats individuels qui vous concernent directement,
- des résultats individuels découverts par hasard (ce qu'on appelle les découvertes fortuites),
- les résultats définitifs objectifs de l'étude dans son ensemble.

a) Au cours de l'étude, la/le médecin-investigat·rice·eur vous avisera de toute nouvelle découverte importante vous concernant. Vous serez informé·e oralement et par écrit; vous pourrez par la suite à nouveau décider si vous souhaitez poursuivre votre participation à l'étude.

b). Les découvertes fortuites constituent des « résultats concomitants », à savoir des résultats qui n'ont pas été explicitement recherchés, mais qui ont été obtenus par hasard. Il peut s'agir p. ex. de résultats d'analyses génétiques ou de procédés d'imagerie (nodules pulmonaires).

Vous serez informé·e des découvertes fortuites si elles ont une incidence sur votre santé. Cela signifie que ces découvertes sont communiquées si l'on constate par hasard une pathologie qui



n'était pas encore connue jusqu'alors ou que l'on peut empêcher l'apparition d'une maladie par des mesures de prévention.

## **9. Confidentialité des données et des échantillons**

### **9.1. Traitement et codage des données**

Dans le cadre de cette étude, des données relatives à votre santé sont recueillies et traitées, en partie de manière automatisée. Ces informations sont codées au moment du relevé. Le codage signifie que toutes les données permettant de vous identifier (nom, date de naissance, etc.) sont effacées et remplacées par un code. Il n'est pas possible de relier les données à votre identité sans le code, qui reste en permanence au sein de l'hôpital. Seul un nombre limité de personnes peut consulter vos données sous une forme non codée, et ce, exclusivement pour pouvoir accomplir les tâches nécessaires au déroulement de l'étude. Ces personnes sont tenues au secret professionnel. Vous avez le droit de consulter vos données.

### **9.2. Protection des données et des échantillons**

Toutes les directives relatives à la protection des données sont rigoureusement respectées. Il est possible que les données doivent être transmises sous forme codée, par exemple pour une publication, et qu'elles puissent être mises à la disposition d'autres chercheurs. Lorsque des données relatives à la santé ou des échantillons biologiques sont conservés sur place, ils constituent une banque de données ou une biobanque à des fins de recherche. Il se peut que ces données et ces échantillons soient envoyés sous forme codée dans le cadre de cette étude à une autre banque de données/biobanque. Le promoteur doit s'assurer que le pays de destination garantit une protection des données équivalente à celle garantie en Suisse.

La partie du matériel biologique qui a été mise à disposition dans le cadre de la participation à l'étude par l'Institut de pathologie n'est en règle générale plus disponible à des fins diagnostiques.

Il se peut que la/le médecin chargé-e de votre suivi soit contacté-e pour des renseignements sur votre état de santé.

### **9.3. Protection des données en cas de réutilisation**

Vos données et vos échantillons pourraient ultérieurement se révéler importants pour répondre à d'autres questionnements et/ou être envoyés à une autre banque de données/biobanque située en Suisse ou à l'étranger pour être aussi exploités dans d'autres projets de recherche (réutilisation). Cette banque de données/biobanque doit toutefois obéir aux mêmes normes et exigences que la banque de données/biobanque de la présente étude.

Pour cette réutilisation, nous vous prions de signer une déclaration de consentement séparée à la fin de cette feuille d'information. Ce deuxième consentement est indépendant de votre participation à l'étude.

### **9.4. Protection des données en cas d'analyses génétiques**

Dès lors que l'on procède à un relevé, un enregistrement ou une transmission de données issues de vos échantillons dans le cadre de la recherche génétique, il existe des risques liés à la confidentialité (p. ex., la possibilité d'identifier la/le participant(e)), en particulier concernant les informations sur votre matériel génétique. Ces risques ne peuvent pas être totalement exclus et augmentent avec la quantité de données pouvant être appariées, notamment si vous avez publié ou publierez des données génétiques sur Internet (p. ex. à des fins de recherche généalogique). Les informations relatives à votre matériel génétique peuvent également être importantes pour les membres de votre famille. Par ailleurs, les résultats d'analyses génétiques doivent être communiqués, sous certaines conditions, avant la conclusion d'une assurance-vie. Le promoteur prend toutes les mesures nécessaires pour réduire le plus possible les risques liés à votre confidentialité.

### **9.5. Droit de consultation dans le cadre d'inspections**

L'étude peut faire l'objet d'inspections. Celles-ci peuvent être effectuées par la commission d'éthique compétente, par l'autorité suisse de contrôle et d'autorisation des produits thérapeutiques



Swissmedic ou par le promoteur qui a initié l'étude. La/le médecin-investigat·rice·eur doit alors communiquer vos données pour les besoins de ces inspections. Toutes les personnes impliquées sont tenues au plus strict secret professionnel.

#### **10. Retrait du projet**

Vous pouvez à tout moment vous retirer de l'étude et mettre fin à votre participation si vous le souhaitez. Cependant, les données médicales et le matériel biologique recueillis jusque-là pourront encore être analysés sous forme codée.

En cas de retrait, vos données et vos échantillons continuent de figurer sous forme codée dans les documents de l'étude, en premier lieu pour assurer la sécurité médicale. Vous devez vérifier si vous êtes d'accord avec cela avant de donner votre consentement.

#### **11. Dédommagement**

Si vous participez à cette étude, vous ne recevrez aucune compensation. Seule l' sera facturée, et la participation à l'étude n'entraînera aucun frais supplémentaire ni pour vous ni pour votre assurance-maladie.

#### **12. Responsabilité**

Les Hôpitaux Universitaires de Genève qui ont initié l'étude et sont chargés de sa réalisation sont responsables des dommages que vous pourriez subir en relation avec les activités de recherche. Les conditions et la procédure sont fixées par la loi. Bien que ces recherches ne présentent pas de risque prévisible, l'institution (le promoteur) est responsable, en vertu des dispositions légales, de tout dommage pouvant survenir dans le cadre de l'étude.

Si vous subissiez un dommage du fait de votre participation à l'étude, il vous faudrait vous adresser à la/au médecin-investigat·rice·eur.

#### **13. Financement**

L'étude est majoritairement financée par le Fond National Suisse et la Ligue Pulmonaire Genevoise.

Vous pouvez à tout moment poser des questions au sujet de l'étude. En cas de doutes, de craintes ou d'urgence pendant ou après l'étude, vous pouvez vous adresser à l'un des interlocuteurs suivants :

- Dre Virginie Prendki, médecin adjoint agrégée, Hôpital Trois-Chêne, HUG, Chemin du Pont-Bochet 3, 1226 Thônex (tel : +4179 55 38308).
- Dr Jérôme Stirnemann, Hôpital Cluse-Roseraie, HUG, Rue Gabrielle-Perret-Gentil 4, 1205 Genève (+4179 553 44 08)

#### **14. Glossaire (termes nécessitant une explication)**

##### ▪ Promoteur

Le promoteur est une personne ou une institution ayant son siège ou une représentation en Suisse qui prend l'initiative d'une étude, c.-à-d. qui porte la responsabilité de son lancement, de sa gestion et de son financement dans ce pays.



## Déclaration de consentement

### Déclaration de consentement écrite pour la participation à une étude clinique

Veillez lire attentivement ce formulaire. N'hésitez pas à poser des questions lorsque vous ne comprenez pas quelque chose ou que vous souhaitez avoir des précisions. Votre consentement écrit est nécessaire pour votre participation.

|                                                                                                           |                                                                                                                                                           |
|-----------------------------------------------------------------------------------------------------------|-----------------------------------------------------------------------------------------------------------------------------------------------------------|
| <b>Numéro BASEC du projet de recherche (après soumission à la commission d'éthique compétente) :</b>      | <b>2019-01288</b>                                                                                                                                         |
| <b>Titre (scientifique et usuel) :</b>                                                                    | <b>OCTOPLUS : comparaison du scanner thoracique à la radiographie et l'ultrasonographie dans le diagnostic de la pneumonie du sujet de plus de 65 ans</b> |
| <b>Institution responsable (promoteur et adresse complète) :</b>                                          | <b>Hôpitaux Universitaires de Genève<br/>Rue Gabrielle-Perret-Gentil 4<br/>1205 Genève (Suisse)</b>                                                       |
| <b>Lieu de réalisation :</b>                                                                              | <b>Hôpitaux Universitaires de Genève</b>                                                                                                                  |
| <b>Médecin-investigat-ric-eur responsable sur le site :</b><br>Nom et prénom en caractères d'imprimerie : | <b>Hôpital des 3-Chêne : Dre Virginie Prendki<br/>Hôpital de Cluse-Roseraie : Dr. Jérôme Stirnemann</b>                                                   |
| <b>Participant-e :</b><br>Nom et prénom en caractères d'imprimerie :<br>Date de naissance :               |                                                                                                                                                           |

- Je déclare avoir été informé-e, par l'investigat-ric-eur soussigné-e, oralement et par écrit, des objectifs et du déroulement de l'étude mettant en œuvre ainsi que des avantages et des inconvénients possibles et des risques éventuels.
- Je prends part à cette étude de façon volontaire et j'accepte le contenu de la feuille d'information qui m'a été remise. J'ai eu suffisamment de temps pour prendre ma décision.
- J'ai reçu les réponses aux questions que j'ai posées en relation avec ma participation à cette étude. Je conserve la feuille d'information et reçois une copie de ma déclaration de consentement écrite.
- J'ai été informé des alternatives thérapeutiques au projet.
- J'accepte que ma/mon médecin traitant(e) soit informé-e de ma participation à l'étude.
- En cas de traitement ultérieur en dehors du lieu de réalisation de cette étude, j'autorise la/le ou les médecins à fournir à la/au médecin-investigat-ric-eur mes données post-traitement pertinentes pour l'étude.
- J'accepte que les spécialistes compétents du promoteur de ce projet, de la commission d'éthique compétente et de l'autorité suisse de contrôle et d'autorisation des produits thérapeutiques Swissmedic puissent consulter mes données non codées afin de procéder à des contrôles et





des inspections, à condition toutefois que la confidentialité de ces données soit strictement assurée.

- Je serai informé-e des résultats ou de toute découverte fortuite ayant une incidence directe sur ma santé. Si je ne souhaite pas obtenir ces informations, j'en avise la/le médecin-investigat·rice·eur.
- Je sais que mes données personnelles, mes données de santé (et mes échantillons) peuvent être transmis(es) à des fins de recherche dans le cadre de cette étude et uniquement sous une forme codée aussi à l'étranger. Le promoteur assure une protection des données conforme aux normes et exigences suisses.
- Je peux, à tout moment et sans avoir à me justifier, révoquer mon consentement à participer à l'étude, sans que cette décision n'ait de répercussions défavorables sur la suite de ma prise en charge. Les données et le matériel biologique qui ont été recueillis jusque-là seront cependant analysés dans le cadre de l'étude.
- Je suis informé-e que l'assurance-responsabilité civile de l'hôpital couvre les dommages éventuels imputables au projet.
- Je suis conscient-e que les obligations mentionnées dans la feuille d'information destinée aux participant·e·s doivent être respectées pendant toute la durée de l'étude. La/le médecin-investigat·rice·eur peut m'exclure à tout moment de l'étude dans l'intérêt de ma santé.

|                     |                                                                                                                                                                                                                                                                                                                                                                                                                                                |
|---------------------|------------------------------------------------------------------------------------------------------------------------------------------------------------------------------------------------------------------------------------------------------------------------------------------------------------------------------------------------------------------------------------------------------------------------------------------------|
| Lieu, date et heure | Signature de la/du participant·e                                                                                                                                                                                                                                                                                                                                                                                                               |
|                     | <p>Je donne mon accord pour OCTOPLUS : <input type="checkbox"/> Oui      <input type="checkbox"/> Non</p> <p>Je donne mon accord pour GERBIOTA : <input type="checkbox"/> Oui      <input type="checkbox"/> Non</p> <p>Je donne mon accord pour la biobanque : <input type="checkbox"/> Oui      <input type="checkbox"/> Non</p> <p>Je donne mon accord pour Pneumoscope : <input type="checkbox"/> Oui      <input type="checkbox"/> Non</p> |

**Attestation de de la personne investigatrice :** Par la présente, j'atteste avoir expliqué à la/au participant·e la nature, l'importance et la portée de l'étude. Je déclare satisfaire à toutes les obligations en relation avec cette étude conformément au droit suisse en vigueur. Si je devais prendre connaissance, à quelque moment que ce soit durant la réalisation de l'étude, d'éléments susceptibles d'influer sur le consentement de la/du participant·e à prendre part au projet, je m'engage à l'en informer immédiatement.

|                     |                                                                          |
|---------------------|--------------------------------------------------------------------------|
| Lieu, date et heure | Nom et prénom de la personne investigatrice en caractères d'imprimerie : |
|                     | Signature de la personne investigatrice :                                |

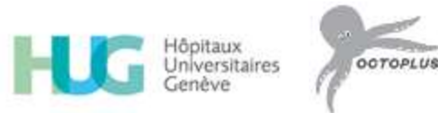

## Déclaration de consentement écrite pour la réutilisation de données (génétique) et d'échantillons biologiques de CETTE étude sous une forme codée.

|                                                                                                                                                                                                                                                                                                                                                                                                                                                                                                                                                                                                                                                                                                                                                                                                                                                                                                                                                                                                                                                                                                                                                                                                                                                                                                                                                                                                                                                                                                                                                                                                                                                                                                                                                  |                                                                                                                                                           |
|--------------------------------------------------------------------------------------------------------------------------------------------------------------------------------------------------------------------------------------------------------------------------------------------------------------------------------------------------------------------------------------------------------------------------------------------------------------------------------------------------------------------------------------------------------------------------------------------------------------------------------------------------------------------------------------------------------------------------------------------------------------------------------------------------------------------------------------------------------------------------------------------------------------------------------------------------------------------------------------------------------------------------------------------------------------------------------------------------------------------------------------------------------------------------------------------------------------------------------------------------------------------------------------------------------------------------------------------------------------------------------------------------------------------------------------------------------------------------------------------------------------------------------------------------------------------------------------------------------------------------------------------------------------------------------------------------------------------------------------------------|-----------------------------------------------------------------------------------------------------------------------------------------------------------|
| <b>Numéro BASEC du projet de recherche (après soumission à la commission d'éthique compétente) :</b>                                                                                                                                                                                                                                                                                                                                                                                                                                                                                                                                                                                                                                                                                                                                                                                                                                                                                                                                                                                                                                                                                                                                                                                                                                                                                                                                                                                                                                                                                                                                                                                                                                             | <b>2019-01288</b>                                                                                                                                         |
| <b>Titre (scientifique et usuel) :</b>                                                                                                                                                                                                                                                                                                                                                                                                                                                                                                                                                                                                                                                                                                                                                                                                                                                                                                                                                                                                                                                                                                                                                                                                                                                                                                                                                                                                                                                                                                                                                                                                                                                                                                           | <b>OCTOPLUS : comparaison du scanner thoracique à la radiographie et l'ultrasonographie dans le diagnostic de la pneumonie du sujet de plus de 65 ans</b> |
| <b>Participant-e :</b><br>Nom et prénom en caractères d'imprimerie :<br>Date de naissance :                                                                                                                                                                                                                                                                                                                                                                                                                                                                                                                                                                                                                                                                                                                                                                                                                                                                                                                                                                                                                                                                                                                                                                                                                                                                                                                                                                                                                                                                                                                                                                                                                                                      |                                                                                                                                                           |
| <ul style="list-style-type: none"> <li>• J'accepte que mes données (génétiques) et mon matériel biologique obtenus dans le cadre de cette étude puissent être réutilisés à des fins de recherche médicale sous forme codée. Cela signifie que le matériel biologique sera conservé dans une biobanque et ultérieurement exploité pour une durée indéfinie dans le cadre de futurs projets de recherche.</li> <li>• Je sais que mon matériel biologique est conservé sous forme codée et que la liste d'identification est gardée dans un lieu sûr. Les données et le matériel biologique peuvent être envoyés à des fins d'analyse à une autre banque de données/biobanque située en Suisse ou à l'étranger, à condition qu'elle obéisse à des normes et exigences au moins équivalentes aux normes et exigences suisses. Toutes les dispositions légales relatives à la protection des données sont respectées.</li> <li>• Je donne mon accord de façon volontaire et je peux à tout moment revenir sur ma décision. Si je reviens sur ma décision, mes données restent codées. Je dois simplement en informer la médecin-investigatrice / le médecin-investigateur. Je n'ai pas à justifier ma décision.</li> <li>• Généralement, les données et le matériel biologique sont exploités de manière globale et les résultats sont publiés de manière synthétique. Il se peut que je sois contacté-e si l'analyse des données révèle une découverte pertinente pour ma santé. Si je ne souhaite pas en être informé-e, il m'incombe d'en aviser la médecin-investigatrice / le médecin-investigateur.</li> <li>• Je renonce à tout droit d'exploitation commerciale sur le matériel biologique qui m'a été prélevé et sur mes données.</li> </ul> |                                                                                                                                                           |
| Lieu, date et heure :                                                                                                                                                                                                                                                                                                                                                                                                                                                                                                                                                                                                                                                                                                                                                                                                                                                                                                                                                                                                                                                                                                                                                                                                                                                                                                                                                                                                                                                                                                                                                                                                                                                                                                                            | Signature de la/du participant-e                                                                                                                          |
| <b>Attestation de la personne investigatrice :</b> Par la présente, j'atteste avoir expliqué à la/au participant-e la nature, l'importance et la portée de la réutilisation des échantillons biologiques et/ou des données génétiques.                                                                                                                                                                                                                                                                                                                                                                                                                                                                                                                                                                                                                                                                                                                                                                                                                                                                                                                                                                                                                                                                                                                                                                                                                                                                                                                                                                                                                                                                                                           |                                                                                                                                                           |
| Lieu, date et heure :                                                                                                                                                                                                                                                                                                                                                                                                                                                                                                                                                                                                                                                                                                                                                                                                                                                                                                                                                                                                                                                                                                                                                                                                                                                                                                                                                                                                                                                                                                                                                                                                                                                                                                                            | Nom et prénom de la personne investigatrice en caractères d'imprimerie :                                                                                  |
|                                                                                                                                                                                                                                                                                                                                                                                                                                                                                                                                                                                                                                                                                                                                                                                                                                                                                                                                                                                                                                                                                                                                                                                                                                                                                                                                                                                                                                                                                                                                                                                                                                                                                                                                                  | Signature de la personne investigatrice :                                                                                                                 |
