# Supplementary material for: LOw-dose CT Or Lung UltraSonography versus standard of care based-strategies for the diagnosis of pneumonia in the elderly: protocol for a multicentre randomised controlled trial (OCTOPLUS)
Source: PubMed Central journal article supplement — BMJ Open. 2022 May 6;12(5):e055869. doi: 10.1136/bmjopen-2021-055869 (PMC9083386; doi:10.1136/bmjopen-2021-055869), 2022-05-06
Supplement: bmjopen-2021-055869supp003.pdf [file bmjopen-2021-055869supp003.pdf]

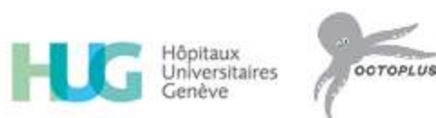

Demande de participation à un projet de recherche médical :

## **OCTOPLUS : comparaison du scanner thoracique à la radiographie et l'ultrasonographie dans le diagnostic de la pneumonie du sujet de plus de 65 ans**

Madame, Monsieur,

La/le patient·e a été intégré·e à un projet de recherche en situation d'urgence. Selon toute probabilité, il/elle restera durablement incapable de discernement et, par-là, de communiquer sa volonté. Dans la mesure où vous la/le représentez en tant que proche ou en tant que représentant·e légal·e nous vous faisons parvenir le présent document pour vous informer de notre étude. De plus, nous vous demandons de nous accorder, avec effet rétroactif et en votre qualité de représentant·e, votre consentement pour la participation au projet.

La participation est entièrement libre. Toutes les données collectées dans le cadre de ce projet sont soumises à des règles strictes en matière de protection des données.

Le projet de recherche est mené par les Hôpitaux Universitaires de Genève.

Lors d'un entretien, nous vous présenterons les éléments essentiels et répondrons à vos questions. Pour vous proposer d'ores et déjà un aperçu du projet, voici les points clés à retenir. Vous trouverez à la suite des informations complémentaires plus détaillées.

### **Pourquoi menons-nous ce projet de recherche ?**

- Cette étude étudie la meilleure façon de diagnostiquer une pneumonie chez des patient·e·s de plus de 65 ans. Trois techniques d'imagerie différentes du thorax sont comparées : les rayons X, le scanner à faible irradiation (CT) et l'échographie (US).
- Cette étude est réalisée chez 500 patient·e·s chez qui une pneumonie est suspectée.
- Même si tous les participant·e·s inclus·e·s dans l'étude ont les trois examens d'imagerie mentionnés ci-dessus, elles/ils sont réparti·e·s au hasard en trois groupes, le résultat initial de l'un des trois examens étant mis à la disposition de la /du médecin compétent·e.

### **Que se passe-t-il pour la/le patient·e en cas de participation ?**

- La durée de l'étude est de 3 mois pour chaque participant·e ou de 1 an si la/le participant·e est inclus·e dans **GEROBIOTA**.
- Un·e membre du personnel de l'étude vous contactera à 1 mois, 3 mois et un an (si inclusion dans **GEROBIOTA**) par téléphone pour vous poser des questions sur l'état de santé de la/du participant·e (environ 5 min par appel).
- Dans le cadre de **GEROBIOTA**, la/le participant·e peut bénéficier d'un examen dentaire complet et d'une évaluation médicale de son âge.

### **Quels sont les bénéfices et les risques liés à la participation au projet ?**

- **Bénéfices pour les participant·e·s**

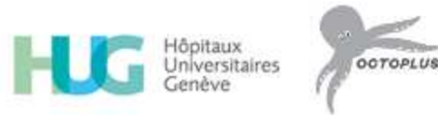

La participation à ce projet de recherche n'apportera à la/au participant·e aucun bénéfice direct. Par sa participation, la/le participant·e contribue à aider les futur·e·s patient·e·s.

▪ **Risques et contraintes**

Une radiographie est l'examen radiologique le plus fréquent et présente une faible exposition aux rayonnements.

Pour le CT thoracique, l'exposition aux rayonnements est également faible (en dessous de l'exposition de la population suisse à la radioactivité toute l'année) et il n'y a pas d'injection de produit de contraste.

L'échographie pulmonaire ne produit pas de rayonnement ionisant.

On ne sait toujours pas quelle est la meilleure stratégie diagnostique. La présente étude fournira des réponses à ce sujet.

Les risques associés à l'étude sont minimes et les résultats escomptés peuvent être très bénéfiques à long terme pour les patient·e·s atteint·e·s d'une pneumonie.

En apposant votre signature à la fin du document, vous certifiez en avoir compris tout le contenu et accorder librement votre consentement pour la participation de la/du patient·e·s au projet.

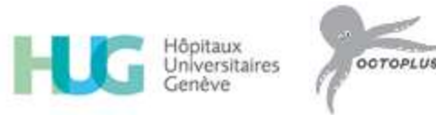

## Information détaillée

### 1. Objectif du projet et sélection des participant·e·s

Dans cette feuille d'information, notre projet de recherche est aussi simplement désigné par le terme *étude*. Si vous accordez votre consentement, en votre qualité de proche ou de représentant·e légal·e, pour la participation de la/du patient·e, cette/ce derni·ère·er est un·e *participant·e à l'étude*.

Nous faisons une étude pour comparer 3 méthodes diagnostiques dans la pneumonie de la personne de plus de 65 ans : la radiographie thoracique, le scanner thoracique à faible irradiation, qui permet l'acquisition d'images plus fines, et l'échographie ou ultrasonographie (US), qui n'engendre pas d'irradiation. La radiographie thoracique est l'examen effectué en routine dans le diagnostic de la pneumonie. Mais elle peut être difficile à interpréter, notamment chez des personnes âgées. D'autres maladies peuvent parfois mimer la pneumonie (bronchite, insuffisance cardiaque...). Or il est essentiel que le diagnostic soit réalisé le plus précisément possible dès les premières heures de l'arrivée à l'hôpital de votre proche afin de lui administrer le traitement adéquat. Un diagnostic plus précis permettrait d'éviter la prescription assez systématique d'antibiotiques. Cette étude pourra montrer si le scanner permet d'améliorer le diagnostic de la pneumonie et de mieux ajuster le traitement par antibiotique en comparaison à la radiographie et à l'échographie.

Certains facteurs de risque de pneumonie ont été identifiés (difficulté à avaler par exemple) mais d'autres sont moins connus comme un mauvais état dentaire. Si vous donnez votre accord, il sera également possible à votre proche de participer à l'étude **GEROBIOTA** qui porte sur le lien entre pneumonie et état de santé dentaire et présence de bactéries dans la bouche et les voies respiratoires (microbiote).

L'étude **Pneumoscope** permettra d'évaluer les performances d'un stéthoscope couplé à de l'intelligence artificielle.

Nous vous sollicitons en votre qualité de proche ou de représentant·e légal·e, car la participation à **OCTOPLUS** est ouverte à toutes les personnes de plus de 65 ans qui ont une suspicion de pneumonie. Elle est fermée aux personnes qui ont eu une pneumonie les trois derniers mois, qui ont déjà eu un scanner thoracique ou qui doivent en avoir un avec une injection, et dont la pneumonie est grave et nécessite un transfert aux soins intensifs.

Un·e médecin indépendant·e de l'étude a déjà été consulté·e pour donner son avis quant à l'absence de risque de votre proche à participer à cette étude.

Il sera proposé aux patient·e·s de Genève et Berne de participer à l'étude **GEROBIOTA** et à **Pneumoscope**.

### 2. Informations générales sur le projet

Il s'agit d'une étude nationale suisse qui porte sur 500 patient·e·s consultant aux urgences pour pneumonie. Chacun·e aura une radiographie, un scanner et une échographie des poumons. Les participant·e·s seront réparti·e·s de façon aléatoire dans 3 groupes en fonction de l'imagerie rendue accessible à la/au médecin. Dans le 1er groupe, la/le médecin aura uniquement accès au résultat de la radiographie, dans le 2ème au scanner et dans le 3ème à l'échographie.

L'étude durera globalement 2 ans et le suivi des participant·e·s se fera pendant 3 mois, voire un an pour les participant·e·s inclus·e·s dans l'étude **GERIOBOTA**.

**GEROBIOTA** : il s'agit de mieux connaître les facteurs de risque de la pneumonie chez les plus de 65 ans. Il sera proposé aux patient·e·s inclus·e·s de bénéficier d'une évaluation gériatrique et d'un

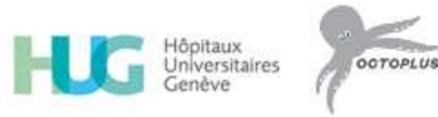

examen bucco-dentaire lors de leur hospitalisation et de faire partie d'une **biobanque** (collection et conservation d'échantillons biologiques à des fins de recherche).

**Pneumoscope** : il s'agit de voir si un stéthoscope couplé à de l'intelligence artificielle permet d'améliorer le diagnostic de pneumonie.

Cette étude est réalisée dans le respect des prescriptions de la législation suisse. Nous suivons en outre l'ensemble des directives reconnues au niveau international. La commission d'éthique compétente a examiné et autorisé l'étude.

Vous trouverez aussi un descriptif de l'étude sur le site Internet de l'Office fédéral de la santé publique : [www.kofam.ch](http://www.kofam.ch) (SNCTP000003808).

### 3. Déroulement pour les participant·e·s

Les 3 imageries seront réalisées aux urgences mais seule l'une d'entre elle sera immédiatement accessible à la/au médecin des urgences. Finalement, au 5ème jour, les résultats des deux autres imageries qui étaient masqués seront de nouveau rendus disponibles.

**PNEUMOSCOPE** : un stéthoscope enregistrant les bruits pulmonaires sera utilisé pour ausculter les participant·e·s aux urgences.

**GEROBIOTA** : examen dentaire et un examen gériatrique (durée de 30 à 45 minutes chacun) seront réalisés.

Un personnel de l'étude prendra de ses nouvelles par téléphone à 1 et 3 mois, et à un an si vous avez accepté qu'elle/il participe à **GEROBIOTA**. Ces entretiens téléphoniques dureront moins de 5 minutes chacun.

Si vous avez donné votre accord pour la **biobanque**, un prélèvement de salive et sang sera réalisé à l'entrée et à la sortie de l'hôpital (pas plus de 30 ml au total), avec congélation de matériel respiratoire restant (crachat, aspiration trachéale ou lavage broncho-alvéolaire le cas échéant, frottis naso-pharyngé).

Vous pouvez à tout moment retirer votre proche de l'étude si vous le souhaitez. Les données médicales et le matériel biologique (échantillons de sang, tissus, etc.) recueillis jusque-là seront tout de même analysés, ceci afin de ne pas compromettre la valeur de l'étude dans son ensemble. Il est impossible de rendre les données et le matériel biologique de votre proche anonymes, c.-à-d. que les données et le matériel biologique resteront codés. Vous devez donc être d'accord avec cela avant de donner votre consentement.

### 4. Bénéfices pour les participant·e·s

La participation de votre proche à cette étude ne lui apportera aucun bénéfice. Mais les résultats de l'étude pourraient se révéler importants par la suite pour les personnes touchées par une pneumonie.

### 5. Caractère facultatif de la participation et obligations

La participation à l'étude est entièrement libre. Si la/le participant·e ne souhaite pas participer ou si vous, en tant que proche ou représentant·e légal·e, revenez ultérieurement sur votre décision à ce sujet, vous n'aurez pas à vous justifier. Cette décision n'aura pas de répercussions défavorables sur la suite de sa prise en charge médicale. Si vous décidez de ne pas donner votre accord, votre proche bénéficiera d'une ou plusieurs des imageries citées ci-dessus pour faire le diagnostic selon la demande du médecin le prenant en charge. Vous pouvez à tout moment poser toutes les questions



nécessaires au sujet de l'étude. Veuillez-vous adresser pour ce faire à la Dre Prendki pour le site des 3-Chêne ou au Dr Stirnemann pour le site de Cluse-Roseraie.

La participation à l'étude implique les obligations suivantes :

La/le participant·e·s est tenu·e·s de suivre les instructions et de remplir les exigences prévues par le protocole de recherche : réalisation de la radiographie, du scanner et de l'échographie aux urgences.

La/le médecin-investigat·rice·eur doit être informé(e) de l'évolution de la maladie et il convient de lui signaler tout nouveau symptôme, tout nouveau trouble et tout changement dans l'état de la/du patient·e.

## 6. Risques et contraintes pour les participant·e·s

La radiographie est la technique la plus couramment utilisée et est faiblement irradiante. Le scanner thoracique est à faible irradiation (moindre que l'irradiation annuelle en Suisse) et ne comprend pas d'injection. L'échographie n'est pas irradiante et réalisée par les médecins des urgences. Les risques inhérents au projet sont minimaux et les résultats attendus pourraient apporter un bénéfice à long terme aux personnes ayant une pneumonie.

### Tableau récapitulatif des contraintes selon chaque étude

| OCTOPLUS                                                                 | GEROBIOTA                                                                                                         | PNEUMOSCOPE                                       |
|--------------------------------------------------------------------------|-------------------------------------------------------------------------------------------------------------------|---------------------------------------------------|
| Réalisation de la radiographie, scanner et de l'échographie aux urgences | Aux urgences : prélèvement de sang (30 ml), salive, matériel respiratoire réalisé en routine ( <b>biobanque</b> ) | Enregistrement de bruits pulmonaires aux urgences |
| Suivi par personnel de l'étude tous les jours pendant l'hospitalisation  | Lors de l'hospitalisation :<br>Examen bucco-dentaire (30-45 min)<br>Evaluation gériatrique (30 à 45 min)          |                                                   |
| Appel téléphonique à 1 et 3 mois (5 min)                                 | Avant la sortie : salive et sang ( <b>biobanque</b> )                                                             |                                                   |
|                                                                          | Appel téléphonique à 1 an (5 min)                                                                                 |                                                   |

## 7. Alternatives

La participation à l'étude présente des bénéfices et des risques. Si vous décidez de ne pas donner votre accord, votre proche bénéficiera d'une ou plusieurs des imageries citées ci-dessus pour faire le diagnostic selon la demande de la/du médecin le prenant en charge. La/le médecin-investigat·rice·eur vous conseillera à ce sujet lors de l'entretien.

## 8. Résultats

L'étude permet d'obtenir différents résultats :

- des résultats individuels qui concernent directement la/le patient·e,
- des résultats individuels découverts par hasard (ce qu'on appelle les découvertes fortuites),
- les résultats définitifs objectifs de l'étude dans son ensemble.

a) Au cours de l'étude, la/le médecin-investigat·rice·eur vous avisera, en votre qualité de proche ou de représentant·e légal·e, de toute nouvelle découverte importante pour la/le participant·e. Vous serez informé·e oralement et par écrit ; vous pourrez par la suite à nouveau décider si la/le patient·e doit poursuivre sa participation à l'étude.



2. Les découvertes fortuites constituent des « résultats concomitants », à savoir des résultats qui n'ont pas été explicitement recherchés, mais qui ont été obtenus par hasard. Il peut s'agir p. ex. de résultats d'analyses génétiques ou de procédés d'imagerie (nodules pulmonaires).

Vous serez informé·e des découvertes fortuites si elles ont une incidence sur la santé de la/du patient·e. Cela signifie que ces découvertes sont communiquées si l'on constate par hasard une pathologie qui n'était pas encore connue jusqu'alors ou que l'on peut empêcher l'apparition d'une maladie par des mesures de prévention.

## **9. Confidentialité des données et des échantillons**

### **9.1. Traitement et codage des données**

Dans le cadre de cette étude, des données relatives à la santé de la/du patient·e sont recueillies et traitées, en partie de manière automatisée. Ces informations sont codées au moment du relevé. Le codage signifie que toutes les données permettant d'identifier la/le patient·e (nom, date de naissance, etc.) sont effacées et remplacées par un code. Il n'est pas possible de relier les données de la/du patient·e sans le code, qui reste en permanence au sein de l'hôpital. Seul un nombre limité de personnes peut consulter les données de la/du patient·e sous une forme non codée, et ce, exclusivement pour pouvoir accomplir les tâches nécessaires au déroulement de l'étude. Ces personnes sont tenues au secret professionnel. En votre qualité de proche ou de représentant·e légal·e, vous avez le droit de consulter les données de la/du patient·e.

### **9.2. Protection des données et des échantillons**

Toutes les directives relatives à la protection des données sont rigoureusement respectées. Il est possible que les données doivent être transmises sous forme codée, par exemple pour une publication, et qu'elles puissent être mises à la disposition d'autres chercheur·ses·eurs. Lorsque des données relatives à la santé ou des échantillons biologiques sont conservés sur place, ils constituent une banque de données ou une biobanque à des fins de recherche. Il se peut que ces données et ces échantillons soient envoyés sous forme codée dans le cadre de cette étude à une autre banque de données/biobanque. Le promoteur doit s'assurer que le pays de destination garantit une protection des données équivalente à celle garantie en Suisse.

La partie du matériel biologique qui a été mise à disposition dans le cadre de la participation à l'étude par l'Institut de pathologie n'est en règle générale plus disponible à des fins diagnostiques.

Il se peut que la/le médecin chargé·e du suivi de la/du patient·e soit contacté·e pour des renseignements sur l'état de santé de cette derni·ère·er.

### **9.3. Protection des données en cas de réutilisation**

Les données et les échantillons de la/du patient·e pourraient ultérieurement se révéler importants pour répondre à d'autres questionnements et/ou être envoyés à une autre banque de données/biobanque située en Suisse ou à l'étranger pour être aussi exploités dans d'autres projets de recherche (réutilisation). Cette banque de données/biobanque doit toutefois obéir aux mêmes normes et exigences que la banque de données/biobanque de la présente étude.

Pour cette réutilisation, nous vous prions de signer, en votre qualité de proche ou de responsable légal, une déclaration de consentement séparée à la fin de cette feuille d'information. Ce deuxième consentement est indépendant de la participation de la/du patient·e à l'étude.

### **9.4. Protection des données en cas d'analyses génétiques**

Dès lors que l'on procède à un relevé, un enregistrement ou une transmission de données issues des échantillons de la/du patient·e dans le cadre de la recherche génétique, il existe des risques liés à la confidentialité (p. ex., la possibilité d'identifier la/le patient·e), en particulier concernant les informations sur son matériel génétique. Ces risques ne peuvent pas être totalement exclus et augmentent avec la quantité de données pouvant être appariées, notamment si la/le patient·e a publié ou publiera ses données génétiques sur Internet (p. ex. à des fins de recherche généalogique). Les informations relatives au matériel génétique de la/du patient·e peuvent



également être importantes pour les membres de sa famille. Par ailleurs, les résultats d'analyses génétiques doivent être communiqués, sous certaines conditions, avant la conclusion d'une assurance-vie. Le promoteur prend toutes les mesures nécessaires pour réduire le plus possible les risques liés à la confidentialité pour la/le patient·e.

#### **9.5. Droit de consultation dans le cadre d'inspections**

L'étude peut faire l'objet d'inspections. Celles-ci peuvent être effectuées par la commission d'éthique compétente, par l'autorité suisse de contrôle et d'autorisation des produits thérapeutiques Swissmedic ou par le promoteur qui a initié l'étude. La/le médecin-investigat·rice·eur doit alors communiquer les données de la/du patient·e pour les besoins de ces inspections. Toutes les personnes impliquées sont tenues au plus strict secret professionnel.

#### **10. Retrait du projet**

La/le patient·e peut à tout moment se retirer de l'étude et mettre fin à sa participation si elle/s'il le souhaite ou que vous en décidiez ainsi en tant que proche ou représentant·e légal·e. Cependant, les données médicales et le matériel biologique recueillis jusque-là pourront encore être analysés sous forme codée.

En cas de retrait, les données et les échantillons de la/du patient·e continuent de figurer sous forme codée dans les documents de l'étude, en premier lieu pour assurer la sécurité médicale. Vous devez vérifier si vous êtes d'accord avec cela avant de donner votre consentement.

#### **11. Dédommagement**

Si votre proche participe à cette étude, il ne recevra aucune compensation. Seule l'imagerie mise à disposition immédiatement sera facturée, et la participation à l'étude n'entraînera aucun frais supplémentaire pour votre proche ou son assurance-maladie.

#### **12. Responsabilité**

Les Hôpitaux Universitaires de Genève qui ont initié l'étude et sont chargés de sa réalisation sont responsables des dommages que pourrait subir la/le patient·e en relation avec les activités de recherche. Les conditions et la procédure sont fixées par la loi. Bien que ces recherches ne présentent pas de risque prévisible, l'institution (le promoteur) est responsable, en vertu des dispositions légales, de tout dommage pouvant survenir dans le cadre de l'étude.

Si la/le patient·e subissait un dommage du fait de sa participation à l'étude, il vous faudrait vous adresser à la/au médecin-investigat·rice·eur.

#### **13. Financement de l'étude**

L'étude est majoritairement financée par le Fond National Suisse et la Ligue Pulmonaire Genevoise.

#### **14. Interlocuteur(s)**

Vous pouvez à tout moment poser des questions au sujet de l'étude. En cas de doutes, de craintes ou d'urgence pendant ou après l'étude, vous pouvez vous adresser à l'un des interlocuteurs suivants :

- Dre Virginie Prendki, médecin adjointe agrégée, Hôpital Trois-Chêne, HUG, Chemin du Pont-Bochet 3, 1226 Thônex (tel : +4179 55 38308).
- Dr Jérôme Stirnemann, Hôpital Cluse-Roseraie, HUG, Rue Gabrielle-Perret-Gentil 4, 1205 Genève (+4179 553 44 08)

#### **15. Glossaire (termes nécessitant une explication)**

##### ▪ Promoteur

Le promoteur est une personne ou une institution ayant son siège ou une représentation en Suisse qui prend l'initiative d'une étude, c.-à-d. qui porte la responsabilité de son lancement, de sa gestion et de son financement dans ce pays.



## Déclaration de consentement

### Déclaration de consentement écrite pour la participation à une étude clinique

Veillez lire attentivement ce formulaire. N'hésitez pas à poser des questions lorsque vous ne comprenez pas quelque chose ou que vous souhaitez avoir des précisions. Votre consentement écrit est nécessaire pour la participation de la/du patient·e.

|                                                                                                            |                                                                                                                                                           |
|------------------------------------------------------------------------------------------------------------|-----------------------------------------------------------------------------------------------------------------------------------------------------------|
| <b>Numéro BASEC du projet de recherche (après soumission à la commission d'éthique compétente) :</b>       | <b>2019-01288</b>                                                                                                                                         |
| <b>Titre (scientifique et usuel) :</b>                                                                     | <b>OCTOPLUS : comparaison du scanner thoracique à la radiographie et l'ultrasonographie dans le diagnostic de la pneumonie du sujet de plus de 65 ans</b> |
| <b>Institution responsable (promoteur et adresse complète) :</b>                                           | <b>Hôpitaux Universitaires de Genève<br/>Rue Gabrielle-Perret-Gentil 4<br/>1205 Genève (Suisse)</b>                                                       |
| <b>Lieu de réalisation :</b>                                                                               | <b>Hôpitaux Universitaires de Genève</b>                                                                                                                  |
| <b>Médecin-investigat·rice·eur responsable sur le site :</b><br>Nom et prénom en caractères d'imprimerie : | <b>Hôpital des 3-Chêne : Dre Virginie Prendki</b><br><b>Hôpital de Cluse-Roseraie : Dr. Jérôme Stirnemann</b>                                             |
| <b>Participant·e :</b><br>Nom et prénom en caractères d'imprimerie :<br>Date de naissance :                |                                                                                                                                                           |

- En ma qualité de proche de représentant·e légal·e de la/du patient·e susmentionné·e, j'ai obtenu les informations écrites et orales de la part de l'investigat·rice·eur soussigné·e sur les objectifs et le déroulement de l'étude mettant en œuvre une nouvelle procédure de diagnostic des pneumonies ainsi que les avantages et les inconvénients possibles et les risques éventuels.
- Je confirme prendre la décision dans le sens du proche ou de la personne placée sous ma responsabilité, à savoir, qu'elle/il participe à l'essai clinique. En son nom, j'accepte les informations écrites et orales. J'ai eu suffisamment de temps pour prendre ma décision.
- J'ai reçu les réponses aux questions que j'ai posées en relation avec la participation à cette étude. Je conserve la feuille d'information et reçois une copie de ma déclaration de consentement.
- J'ai été informé·e des alternatives de méthode de diagnostic au projet.
- J'accepte que la/le médecin traitant·e de la/du patient·e soit informé·e de sa participation au projet de recherche.
- En cas de traitement ultérieur en dehors du lieu de réalisation de cette étude, j'autorise la/le ou les médecins à fournir à la/au médecin-investigat·rice·eur les données post-traitement de la/du patient·e pertinentes pour l'étude.
- J'accepte que les spécialistes compétent·e·s du promoteur de ce projet, de la commission d'éthique compétente et de l'autorité suisse de contrôle et d'autorisation des produits thérapeutiques (Swissmedic) puissent consulter les données non codées de la/du patient·e afin de procéder à des contrôles et des inspections, à condition toutefois que la confidentialité de ces données soit strictement assurée.



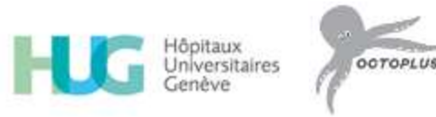

- Je serai informé·e en lieu et place de la/du patient·e des résultats et/ou de toute découverte fortuite ayant une incidence directe sur sa santé. Si j'estime que cela ne correspond pas à la volonté du participant·e à l'étude, j'en avise la/le médecin-investigat·rice·eur.
- Je sais que les données personnelles (et les échantillons) peuvent être transmis·e-s à des fins de recherche dans le cadre de cette étude et uniquement sous une forme codée. Le promoteur assure une protection des données conforme aux normes et exigences suisses.
- Au nom de la/du patient·e, je peux, à tout moment et sans avoir à me justifier, révoquer mon consentement à la participation, sans que cette décision n'ait de répercussions défavorables sur la suite de sa prise en charge. Les données et les échantillons recueillis jusqu'au retrait seront cependant analysés dans le cadre de l'étude.
- Je suis informé·e que l'assurance-responsabilité civile de l'hôpital couvre les dommages éventuels imputables au projet.
- Je suis conscient·e que les obligations mentionnées dans la feuille d'information destinée aux participant·e-s doivent être respectées pendant toute la durée de l'étude. La/le médecin-investigat·rice·eur peut exclure la/le patient·e du projet à tout moment dans l'intérêt de sa santé.

#### Attestation de la/du proche, de la/du représentant·e légal·e :

Par la présente, j'atteste/nous attestons que l'entretien informatif a eu lieu que l'adulte incapable de discernement a consenti à participer à cette étude et/ou qu'il n'y a aucun signe d'opposition à sa participation.

|                     |                                                                                                   |
|---------------------|---------------------------------------------------------------------------------------------------|
| Lieu, date et heure | Nom et prénom en caractères d'imprimerie :                                                        |
|                     | Relation avec la/le patient·e (conjoint·e/fils ou fille, etc.) :                                  |
|                     | Je donne mon accord pour OCTOPLUS : <input type="checkbox"/> Oui <input type="checkbox"/> Non     |
|                     | Je donne mon accord pour GEROBOTA : <input type="checkbox"/> Oui <input type="checkbox"/> Non     |
|                     | Je donne mon accord pour la biobanque : <input type="checkbox"/> Oui <input type="checkbox"/> Non |
|                     | Je donne mon accord pour Pneumoscope : <input type="checkbox"/> Oui <input type="checkbox"/> Non  |
|                     | Signature de la/du proche, de la/du représentant·e légal·e :                                      |

**Attestation de la/du médecin-investigat·rice·eur ou de la personne investigatrice :** Par la présente, j'atteste avoir expliqué à la personne représentant la/le patient·e l'importance et la portée de l'étude. Je déclare satisfaire à toutes les obligations en relation avec cette étude conformément au droit suisse en vigueur. Si je devais, à quelque moment que ce soit durant la réalisation de l'étude, prendre connaissance d'éléments susceptibles d'influer sur le consentement de la/du participant·e à prendre part au projet, je m'engage à en informer immédiatement la personne la/le représentant.

|                     |                                                                          |
|---------------------|--------------------------------------------------------------------------|
| Lieu, date et heure | Nom et prénom de la personne investigatrice en caractères d'imprimerie : |
|                     | Signature de la personne investigatrice :                                |

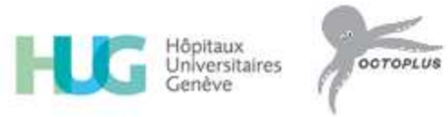



**Déclaration de consentement écrite dée pour la réutilisation de données (génétique) et d'échantillons biologiques de CETTE étude sous forme codée.**

|                                                                                                      |                                                                                                                                                           |
|------------------------------------------------------------------------------------------------------|-----------------------------------------------------------------------------------------------------------------------------------------------------------|
| <b>Numéro BASEC du projet de recherche (après soumission à la commission d'éthique compétente) :</b> | <b>2019-01288</b>                                                                                                                                         |
| <b>Titre (scientifique et usuel) :</b>                                                               | <b>OCTOPLUS : comparaison du scanner thoracique à la radiographie et l'ultrasonographie dans le diagnostic de la pneumonie du sujet de plus de 65 ans</b> |
| <b>Participant-e :</b><br>Nom et prénom en caractères d'imprimerie :<br>Date de naissance :          |                                                                                                                                                           |

- J'accepte que les données (génétiques) et le matériel biologique de la/du patient-e obtenus dans le cadre de cette étude puissent être réutilisés à des fins de recherche médicale sous forme codée. Cela signifie que le matériel biologique sera conservé dans une biobanque et ultérieurement exploité pour une durée indéfinie dans le cadre de futurs projets de recherche.
- Je sais que les données et le matériel biologique de la/du patient-e sont conservés sous forme codée et que la liste d'identification est gardée dans un lieu sûr. Les données et matériel biologique peuvent être envoyés à des fins d'analyse à une autre biobanque située en Suisse ou à l'étranger, à condition qu'elle obéisse à des normes et exigences au moins équivalentes aux normes et exigences suisses. Toutes les dispositions légales relatives à la protection des données sont respectées.
- Je donne mon accord de façon volontaire et je peux à tout moment revenir sur ma décision. Je dois simplement en informer la/le médecin-investigat-ric-e-ur et je n'ai pas à justifier ma décision.
- Généralement, les données et le matériel biologique sont exploités de manière globale et les résultats sont publiés de manière synthétique. Dans le cas où l'analyse des données révélait une découverte pertinente pour la santé de la/du patient-e, la/le médecin-investigat-ric-e-ur me contactera. Si je ne souhaite pas en être informé, il m'incombe de l'annoncer à la/au médecin-investigat-ric-e-ur.
- Je renonce à tout droit d'exploitation commerciale sur le matériel biologique qui m'a été prélevé et sur mes données.

**Attestation de la/du proche, de la/du représentant-e légal-e :**

Par la présente, j'atteste que l'entretien informatif a eu lieu et que l'adulte incapable de discernement a consenti à participer à cette étude et/ou qu'il n'y a aucun signe d'opposition à sa participation.

|                       |                                                                        |
|-----------------------|------------------------------------------------------------------------|
| Lieu, date et heure : | Nom et prénom en caractères d'imprimerie :                             |
|                       | Relation avec la/le participant-e : (conjoint/e/fils ou fille, etc.) : |
|                       | Signature de la/du proche, de la/du représentant-e légal-e :           |

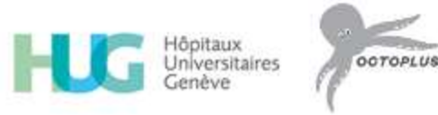

**Attestation de la personne investigatrice :** Par la présente, j'atteste avoir expliqué à la personne représentant la/le patient·e l'importance et la portée de la réutilisation des échantillons biologiques et/ou des données génétiques.

Lieu, date et heure : Nom et prénom de la personne investigatrice en caractères d'imprimerie :

Signature de la personne investigatrice :
