# Supplementary material for: LOw-dose CT Or Lung UltraSonography versus standard of care based-strategies for the diagnosis of pneumonia in the elderly: protocol for a multicentre randomised controlled trial (OCTOPLUS)
Source: HighWire-hosted journal article supplement (doi:10.1136/bmjopen-2021-055869), 2022-05-01
Supplement: bmjopen-2021-055869supp004_data_supplement.pdf [file bmjopen-2021-055869supp004_data_supplement.pdf]

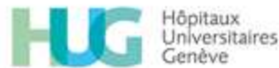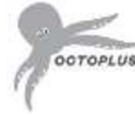

## Confirmation écrite d'un·e médecin non associé·e au projet de recherche

**Confirmation écrite pour le/la médecin non associé·e au projet de recherche, qui n'est pas impliqué·e dans le projet de recherche mentionné ci-après et qui défend les intérêts de la personne se prêtant à l'expérience (LRH art 30).**

### Données sur l'essai clinique

|                                                                                                                                                                                    |                    |
|------------------------------------------------------------------------------------------------------------------------------------------------------------------------------------|--------------------|
| Titre du projet de recherche: <b>OCTOPLUS : comparaison du scanner thoracique à la radiographie et l'échographie dans le diagnostic de la pneumonie du sujet de plus de 65 ans</b> |                    |
| Numéro du projet de recherche: <b>2019-01288</b>                                                                                                                                   |                    |
| Lieu où se déroule le projet de recherche : <b>Hôpitaux Universitaires de Genève</b>                                                                                               |                    |
| Nom et prénom de la médecin investigatrice responsable: <b>Dre Virginie Prendki</b>                                                                                                |                    |
| <b>Nom et prénom du/ de la participant·e:</b>                                                                                                                                      |                    |
| Date de naissance (facultatif):                                                                                                                                                    | sexe (facultatif): |

J'ai reçu et j'ai lu le résumé du protocole de l'essai clinique susmentionné.

J'atteste que les intérêts de la/du participant·e sont respectés et que son suivi médical est garanti.

|                     |                                                                                                                       |                                                                 |
|---------------------|-----------------------------------------------------------------------------------------------------------------------|-----------------------------------------------------------------|
| Lieu, date et heure | Nom, prénom et numéro de téléphone de la/du médecin non associé·e au projet de recherche (en caractères d'imprimerie) | Signature de la/du médecin non associé·e au projet de recherche |
|---------------------|-----------------------------------------------------------------------------------------------------------------------|-----------------------------------------------------------------|

Par la présente, j'atteste avoir expliqué à la/au médecin non associé·e au projet de recherche la nature, l'importance et la portée du projet. Si je devais prendre connaissance, à quelque moment que ce soit durant la réalisation du projet, d'éléments susceptibles d'influer sur le consentement de la/du participant·e à prendre part au projet de recherche, je m'engage à l'en informer immédiatement.

|                     |                                                                                                     |                                               |
|---------------------|-----------------------------------------------------------------------------------------------------|-----------------------------------------------|
| Lieu, date et heure | Nom, prénom et numéro de téléphone de l'investigatrice·eur responsable (en caractères d'imprimerie) | Signature de l'investigatrice·eur responsable |
|---------------------|-----------------------------------------------------------------------------------------------------|-----------------------------------------------|

GE\_ICF\_Octoplus\_medecin\_V5.1\_31mai2021\_fr
